# Supplementary material for: A Cross-Platform Comparison of Genome-Wide Expression Changes of Laser Microdissected Lung Tissue of C-Raf Transgenic Mice Using 3′IVT and Exon Array
Source: PLoS One. 2012 Jul 16;7(7):e40778. doi: 10.1371/journal.pone.0040778 (PMC3397940; doi:10.1371/journal.pone.0040778)
Supplement: File S3 — List of genes found common in 3′IVT and exon array while comparing dysplasia vs transgenic groups. 3′IVT array analyzed with ArrayTrack software with parameters as false detection rate (FDR) <0.001, fold change of ≥2, mean channel intensity (MCI) of 100, bad flag of 5. For exon array differential gene expression fold change obtained using Biotique XRAY software at full probeset level with p<0.05 using a minimum probeset per gene of 2 and a minimum of 2 probes per probeset. (XLS) [file pone.0040778.s008.xls]

## Sheet: Sheet1
Gene symbol	NCBI annotation	gene discription	GEN_ID_MFR 3'IVT	LOCUSID 3'IVT	p value 3'IVT	fold change 3'IVT array	probe id exon array	p value exon array for gene expression	fold change exon array_full probeset level
0610040J01Rik	NM_029554	RIKEN cDNA 0610040J01 gene	1424404_at	76261	0	2.8671	6931168	0.00210585	1.51
1110006O17Rik	NM_001033141	RIKEN cDNA 1110006O17 gene	1437451_at	68545	0	-2.49252	6864608	0.00710026	-1.31
1110012J17Rik	NM_172963	RIKEN cDNA 1110012J17 gene	1442363_at	68617	0	2.3028	6856710	6.41876e-05	1.41
1110018M03Rik	NM_026271	RIKEN cDNA 1110018M03 gene	1419376_at	67606	0.0007	-4.99251	6889661	0.033509	-1.61
1110032E23Rik	NM_133187	RIKEN cDNA 1110032E23 gene	1416805_at	68659	0	-3.37268	6898630	0.0474402	-1.41
1190002N15Rik	NM_001033145	RIKEN cDNA 1190002N15 gene	1433581_at	68861	0	-2.91886	6997917	0.0117937	-1.61
1200009I06Rik	NM_028807	RIKEN cDNA 1200009I06 gene	1428420_a_at	74190	0.0009	-2.22173	6798212	0.0234148	-1.31
1200015N20Rik	NM_024244	RIKEN cDNA 1200015N20 gene	1448557_at	71721	0.0001	-2.64271	6768621	0.00257101	-1.41
1300014I06Rik	NM_025831	RIKEN cDNA 1300014I06 gene	1428851_at	66895	0.0004	-3.15457	6812250	9.60111e-05	-1.21
1500012F01Rik	NM_001081005	RIKEN cDNA 1500012F01 gene	1455010_at	68949	0	3.5329	6883279	0.0143274	1.21
1700027A23Rik	NM_029604	RIKEN cDNA 1700027A23 gene	1453320_at	76420	0.0001	8.465	6907939	0.041844	1.41
1810011O10Rik	NM_026931	RIKEN cDNA 1810011O10 gene	1435595_at	69068	0	-2.92312	6981091	0.00150842	-1.71
2010001J22Rik	NM_001013022	RIKEN cDNA 2010001J22 gene	1443671_x_at	70113	0.0005	2.8412	6837815	0.0236465	1.31
2010001K21Rik	AK008011	RIKEN cDNA 2010001K21 gene	1447576_at	69829	0	2.6399	6806819	5.25631e-05	1.81
2010300C02Rik	AK039052	RIKEN cDNA 2010300C02 gene	1452861_at	72097	0	2.0588	6757979	0.00010276	1.81
2310016C08Rik	NM_023516	RIKEN cDNA 2310016C08 gene	1421031_a_at	69573	0	-4.70367	6944982	0.0289994	-1.51
2310040A07Rik	BC021944	RIKEN cDNA 2310040A07 gene	1452893_s_at	69638	0.0002	-3.72439	6921057	0.00324264	-1.41
2310045A20Rik	NM_172710	RIKEN cDNA 2310045A20 gene	1452227_at	231238	0	3.6098	6938217	0.0011016	1.61
2310047A01Rik	XM_908180	RIKEN cDNA 2310047A01 gene	1428431_at	71918	0.0014	-2.34577	6823414	0.000931022	-1.41
2310056P07Rik	NM_027342	RIKEN cDNA 2310056P07 gene	1451385_at	70186	0	2.3652	6845382	0.0154261	1.61
2310057J16Rik	BC048787	RIKEN cDNA 2310057J16 gene	1432464_a_at	69697	0	2.8556	6973688	0.000404735	1.71
2610203C20Rik	AK034202	RIKEN cDNA 2610203C20 gene	1455160_at	70455	0.0015	3.3958	6988454	0.000104231	2.11
3110049J23Rik	NM_026085	RIKEN cDNA 3110049J23 gene	1449462_at	67307	0.0004	4.2332	6768332	0.000672637	1.41
4631427C17Rik	NM_021414	RIKEN cDNA 4631427C17 gene	1452703_at	74340	0	2.2411	6945034	0.00899283	1.51
4632428N05Rik	NM_028732	RIKEN cDNA 4632428N05 gene	1416619_at	74048	0.0001	-2.28258	6768157	0.000654809	-1.41
4732435N03Rik	NM_172753	RIKEN cDNA 4732435N03 gene	1452366_at	234356	0.0001	-3.69413	6983073	0.0016713	-1.41
4922503N01Rik	NM_153392	RIKEN cDNA 4922503N01 gene	1455162_at	230603	0.0013	2.694	6916239	0.000522247	1.61
4933428G20Rik	NM_021493	RIKEN cDNA 4933428G20 gene	1419745_at	58996	0	-2.29516	6783914	0.011234	-1.21
5033414K04Rik	NM_001003948	RIKEN cDNA 5033414K04 gene	1436999_at	98496	0.0003	-3.40716	6760289	0.00913967	-1.41
5430407P10Rik	BC025867	RIKEN cDNA 5430407P10 gene	1456210_at	227545	0	3.0738	6884473	0.00139817	1.91
5430433G21Rik	AK044859	RIKEN cDNA 5430433G21 gene	1436987_at	319909	0.0003	-2.47463	6881590	0.00150924	-1.51
5730469M10Rik	NM_027464	RIKEN cDNA 5730469M10 gene	1452716_at	70564	0.0005	2.3881	6824146	2.48709e-05	1.81
5730557B15Rik	NM_027496	RIKEN cDNA 5730557B15 gene	1453287_at	67434	0.0055	-3.73972	6834728	0.000378616	-1.51
5730559C18Rik	NM_028872	RIKEN cDNA 5730559C18 gene	1436345_at	67313	0	5.0943	6762471	0.00187756	1.91
6330512M04Rik	BC049666	RIKEN cDNA 6330512M04 gene	1455239_at	320802	0	-3.25203	6972292	0.00712257	-1.81
6430548M08Rik	BC027126	RIKEN cDNA 6430548M08 gene	1435928_at	234797	0.004	-2.80348	6979527	0.0302165	-1.21
9130213B05Rik	NM_145562	RIKEN cDNA 9130213B05 gene	1428891_at	231440	0	8.053	6932409	0.00250291	2.41
9230104L09Rik	NM_029960	RIKEN cDNA 9230104L09 gene	1432531_at	77705	0	-3.4002	6891903	0.0327907	-1.71
9430020K01Rik	NM_001081963	RIKEN cDNA 9430020K01 gene	1428535_at	240185	0	-2.92826	6858534	0.00385058	-1.51
9430073N08Rik	XM_974019	RIKEN cDNA 9430073N08 gene	1453496_at	77296	0.0001	-5.16796	6773917	0.00154984	-1.31
9630050M13Rik	NM_001081161	RIKEN cDNA 9630050M13 gene	1438402_at	269233	0.0047	-3.54359	6874537	0.0111872	-1.41
A130040M12Rik	NR_002860	RIKEN cDNA A130040M12 gene	1428909_at	319269	0.0014	2.1449	6790521	0.000176781	2.51
A4galt	NM_001004150	alpha 1 4-galactosyltransferase	1455338_at	239559	0.0004	-2.16638	6837435	0.024098	1.01
AA409316	NM_134087	expressed sequence AA409316	1452273_at	105732	0.0001	2.4923	6836792	7.60785e-05	1.51
Aard	NM_175503	alanine and arginine rich domain containing protein	1434528_at	239435	0	-4.4964	6830364	0.0246368	-1.51
Abca8a	NM_153145	ATP-binding cassette sub-family A (ABC1) member 8a	1427371_at	217258	0.0003	-3.81679	6792114	0.0205617	-1.41
Abcg1	NM_009593	ATP-binding cassette sub-family G (WHITE) member 1	1455221_at	11307	0	-2.15657	6849766	0.0098905	-1.21
Abcg2	NM_011920	ATP-binding cassette sub-family G (WHITE) member 2	1422906_at	26357	0	-2.14179	6946554	0.015891	-1.31
Abhd2	NM_018811	abhydrolase domain containing 2	1418661_at	54608	0.0004	2.7387	6961913	1.4153e-05	1.91
Abi3bp	NM_178790	ABI gene family member 3 (NESH) binding protein	1427053_at	320712	0.0018	-3.77216	6841712	0.0193943	-1.71
Ablim3	NM_198649	actin binding LIM protein family member 3	1434013_at	319713	0	-3.97772	6866006	0.00857376	-1.61
Ace	NM_207624	angiotensin I converting enzyme (peptidyl-dipeptidase A) 1	1427034_at	11421	0.0001	-2.94204	6784587	0.0161902	-1.51
Ace2	NM_027286	angiotensin I converting enzyme (peptidyl-dipeptidase A) 2	1452138_a_at	70008	0.0052	3.31	7015002	0.000294663	2.41
Aco1	NM_007386	aconitase 1	1423644_at	11428	0	2.1603	6912820	1.35167e-06	1.51
Acpl2	NM_153420	acid phosphatase-like 2	1456735_x_at	235534	0.0011	2.3547	6998094	6.82138e-05	1.61
Acsl3	NM_001033606	acyl-CoA synthetase long-chain family member 3	1452771_s_at	74205	0	2.4937	6750868	0.00102192	1.61
Acsl4	NM_001033600	acyl-CoA synthetase long-chain family member 4	1451828_a_at	50790	0.0004	3.506	7019867	2.70149e-05	1.91
Acvrl1	NM_009612	activin A receptor type II-like 1	1435825_at	11482	0	-4.70588	6833305	0.0272452	-1.71
Adamts15	NM_001024139	a disintegrin-like and metallopeptidase (reprolysin type) with thrombospondin type 1 motif 15	1427056_at	235130	0	-3.02389	6994343	0.00591481	-1.51
Adamts8	NM_013906	a disintegrin-like and metallopeptidase (reprolysin type) with thrombospondin type 1 motif 8	1418270_at	30806	0.006	-3.36927	6987862	0.00312029	-1.31
Adamtsl4	NM_144899	ADAMTS-like 4	1451932_a_at	229595	0	-2.47586	6907202	0.00675403	-1.31
Adcy4	NM_080435	adenylate cyclase 4	1418098_at	104110	0	-3.13775	6824844	0.00801147	-1.61
Adcy5	NM_001012765	adenylate cyclase 5	1455296_at	224129	0	-2.73149	6840705	0.000187305	-1.31
Adcy8	NM_009623	adenylate cyclase 8	1418754_at	11514	0.0009	-6.04961	6836260	0.0132391	-1.71
Adcyap1	NM_009625	adenylate cyclase activating polypeptide 1	1423427_at	11516	0.0024	4.5908	6853121	0.0135695	1.71
Add3	NM_013758	adducin 3 (gamma)	1456162_x_at	27360	0.0069	-2.97265	6870424	0.0298537	-1.41
Adora1	NM_001039510	adenosine A1 receptor	1435495_at	11539	0	5.9797	6762353	8.26252e-07	3.11
Adrb1	NM_007419	adrenergic receptor beta 1	1423420_at	11554	0.0042	-2.19877	6870622	0.0155843	-1.21
Adssl1	NM_007421	adenylosuccinate synthetase like 1	1449383_at	11565	0	5.1357	6798271	7.3284e-06	2.41
Aff2	NM_008032	AF4/FMR2 family member 2	1443847_x_at	14266	0.0004	-2.79408	7011776	0.0018986	-1.31
Aff3	NM_010678	AF4/FMR2 family member 3	1433939_at	16764	0.0001	-4.0404	6758001	0.0212455	-1.31
Agpat4	NM_026644	1-acylglycerol-3-phosphate O-acyltransferase 4 (lysophosphatidic acid acyltransferase delta)	1436640_x_at	68262	0	-3.52485	6848688	0.00194497	-1.31
Akap12	NM_031185	A kinase (PRKA) anchor protein (gravin) 12	1419706_a_at	83397	0.0009	-4.77555	6971576	0.00233245	-2.21
Akap2	NM_001035532	A kinase (PRKA) anchor protein 2	1449168_a_at	11641	0.038	-3.73552	6913804	0.0215435	-1.71
Akr1b8	NM_008012	aldo-keto reductase family 1 member B8	1448894_at	14187	0	4.6706	6945308	6.9082e-06	2.11
Akr1c19	NM_001013785	aldo-keto reductase family 1 member C19	1455454_at	432720	0	6.1272	6804526	8.19849e-05	2.31
Akt3	NM_011785	thymoma viral proto-oncogene 3	1435879_at	23797	0.0004	-2.5208	6764435	0.0329551	-1.41
Alas2	NM_009653	aminolevulinic acid synthase 2 erythroid	1451675_a_at	11656	0.0009	-4.58716	7014503	0.000314718	-1.71
Aldh1a7	NM_011921	aldehyde dehydrogenase family 1 subfamily A7	1418601_at	26358	0	2.0708	6872029	0.00365213	2.01
Amigo2	NM_178114	adhesion molecule with Ig like domain 2	1434601_at	105827	0.0012	-2.18293	6838303	0.00191584	-1.51
Amph	NM_175007	amphiphysin	1427044_a_at	218038	0.0004	-4.46828	6805103	0.0356743	-1.31
Angpt1	NM_009640	angiopoietin 1	1439066_at	11600	0.0007	-4.13394	6835353	0.0205001	-1.51
Angpt2	NM_007426	angiopoietin 2	1448831_at	11601	0.0003	-2.23614	6980871	0.0195662	-1.41
Angptl2	NM_011923	angiopoietin-like 2	1455090_at	26360	0.0023	-2.20848	6876238	0.0373947	-1.31
Ankrd1	NM_013468	ankyrin repeat domain 1 (cardiac muscle)	1420992_at	107765	0	-4.64684	6872834	0.0141221	-1.71
Ankrd22	NM_024204	ankyrin repeat domain 22	1453239_a_at	52024	0	10.7321	6872761	0.000687513	2.61
Ankrd29	AK162301	ankyrin repeat domain 29	1438756_at	225187	0.0001	-2.58065	6863440	0.0111296	-1.41
Ankrd38	NM_172872	ankyrin repeat domain 38	1436425_at	242553	0	-4.77783	6923676	0.0443965	-1.21
Ankrd47	NM_030697	ankyrin repeat domain 47	1456629_at	80880	0	-2.86862	6849970	0.0271625	-1.31
Ankrd56	NM_175270	ankyrin repeat domain 56	1438408_at	78088	0	2.694	6940039	0.00199881	1.81
Anpep	NM_008486	alanyl (membrane) aminopeptidase	1421424_a_at	16790	0.0004	-2.09512	6968735	0.000298643	-1.61
Aox1	NM_009676	aldehyde oxidase 1	1419435_at	11761	0	2.447	6749702	3.43354e-05	1.81
Aox3	NM_023617	aldehyde oxidase 3	1418858_at	71724	0	2.5515	6749704	4.71069e-05	1.91
Ap1s2	NM_026887	adaptor-related protein complex 1 sigma 2 subunit	1447903_x_at	108012	0.0037	-2.2604	7014982	0.0284251	-1.21
Apba1	NM_177034	amyloid beta (A4) precursor protein binding family A member 1	1455369_at	319924	0.0012	-2.17061	6868728	0.00471822	-1.31
Aqp3	NM_016689	aquaporin 3	1450460_at	11828	0	5.3722	6921012	0.00237713	1.61
Ar	NM_013476	androgen receptor	1437064_at	11835	0.0015	-3.36587	7012730	0.0350022	-1.31
Areg	NM_009704	amphiregulin	1421134_at	11839	0	15.3791	6932394	5.3273e-05	5.41
Arg2	NM_009705	arginase type II	1438841_s_at	11847	0	5.1608	6796331	0.00129306	2.11
Arhgap20	NM_175535	Rho GTPase activating protein 20	1429918_at	244867	0.0035	-2.65322	6989086	0.0395995	-1.41
Arhgef10	NM_001037736	Rho guanine nucleotide exchange factor (GEF) 10	1452302_at	234094	0.0002	-2.82805	6974254	0.00664413	-1.41
Arhgef15	NM_177566	Rho guanine nucleotide exchange factor (GEF) 15	1457172_at	442801	0.0006	-4.12882	6789235	0.0241528	-1.61
Arhgef16	BC044805	Rho guanine nucleotide exchange factor (GEF) 16	1427386_at	230972	0	2.1737	6927212	0.0158064	1.31
Arrb1	NM_178220	arrestin beta 1	1460444_at	109689	0.0001	-2.03335	6962880	0.0388773	-1.21
Arvcf	NM_033474	armadillo repeat gene deleted in velo-cardio-facial syndrome	1423061_at	11877	0.0007	-2.82247	6839836	0.043359	-1.21
Asah3l	NM_139306	N-acylsphingosine amidohydrolase 3-like	1451355_at	230379	0.0005	-3.68053	6915138	1.38004e-05	-1.61
Atf5	AF375476	activating transcription factor 5	1425927_a_at	107503	0.0004	-2.20946	6966903	0.000744398	-1.21
Atp13a4	NM_172613	ATPase type 13A4	1438707_at	224079	0	7.5848	6844955	4.7386e-06	5.31
Atp1a2	NM_178405	ATPase Na+/K+ transporting alpha 2 polypeptide	1452308_a_at	98660	0	-4.69704	6764138	0.0214116	-1.41
Atp6v0a1	NM_016920	ATPase H+ transporting lysosomal V0 subunit A1	1425227_a_at	11975	0	2.751	6784236	7.8804e-05	2.01
Atp6v0a4	NM_080467	ATPase H+ transporting lysosomal V0 subunit A4	1422030_at	140494	0.0001	5.8508	6952818	0.00124004	2.81
Auts2	NM_177047	autism susceptibility candidate 2	1438680_at	319974	0.0018	3.3399	6942280	0.00182764	-1.11
Avpi1	NM_027106	arginine vasopressin-induced 1	1423122_at	69534	0	2.2821	6873171	0.00647173	1.61
AW061290	NM_201361	expressed sequence AW061290	1455063_at	381110	0.0002	2.8256	6852438	0.000313973	1.71
Azin1	NM_018745	antizyme inhibitor 1	1450714_at	54375	0	2.4551	6835104	5.98933e-07	2.21
B430119L13Rik	NM_177303	RIKEN cDNA B430119L13 gene	1435648_at	320974	0.0025	-5.47645	6891115	4.79935e-05	-1.81
B4galnt1	NM_008080	beta-1 4-N-acetyl-galactosaminyl transferase 1	1425363_at	14421	0.0006	2.9226	6771546	0.00445591	1.31
B4galt6	NM_019737	UDP-Gal:betaGlcNAc beta 1 4-galactosyltransferase polypeptide 6	1460329_at	56386	0	4.5002	6863783	0.0010655	2.21
BC018465	NM_144890	cDNA sequence BC018465	1425046_at	228802	0.0001	-2.50376	6882444	0.0163916	-1.51
BC028528	NM_153513	cDNA sequence BC028528	1445301_at	229600	0.0027	-3.80807	6907222	0.0102489	-1.71
BC038167	XM_988940	cDNA sequence BC038167	1458104_a_at	270150	0.0067	3.4776	6988617	0.0196669	2.51
BC048546	NM_001001179	cDNA sequence BC048546	1436503_at	232400	0	16.2135	6957352	0.00617548	2.11
BC054438	NM_001001183	cDNA sequence BC054438	1447915_x_at	407831	0.0046	-3.61664	6854404	0.00537039	-1.51
BC055107	NM_183187	cDNA sequence BC055107	1434202_a_at	268709	0.0123	-5.50055	6822477	0.0328071	-1.31
BC063749	NM_001001738	cDNA sequence BC063749	1433943_at	414801	0	-2.21337	6873520	0.0330765	1.81
BC065085	NM_177628	cDNA sequence BC065085	1455872_at	219148	0	5.6821	6819722	0.00110546	1.91
Bche	AK052200	butyrylcholinesterase	1436098_at	12038	0.0001	-4.9554	6906056	0.00899497	-1.21
Bcr	NM_001081412	breakpoint cluster region homolog	1452368_at	110279	0.0001	2.3693	6768848	0.00223264	1.11
Bdnf	NM_001048139	brain derived neurotrophic factor	1422169_a_at	12064	0	-3.66972	6879925	0.0487586	-1.21
Bmp1	NM_009755	bone morphogenetic protein 1	1426238_at	12153	0	2.1628	6825704	4.86442e-06	1.61
Bmp4	NM_007554	bone morphogenetic protein 4	1422912_at	12159	0	2.1866	6824266	2.24101e-05	1.71
Bmper	NM_028472	BMP-binding endothelial regulator	1429273_at	73230	0	-3.46861	6987490	0.00687703	-1.51
Bmpr2	NM_007561	bone morphogenic protein receptor type II (serine/threonine kinase)	1441652_at	12168	0.0002	-2.4079	6749785	0.0175132	-1.71
Bmx	NM_009759	BMX non-receptor tyrosine kinase	1422084_at	12169	0.0059	-2.3663	7020683	0.0220026	-1.11
Brca1	NM_009764	breast cancer 1	1424629_at	12189	0.0009	2.2423	6791504	0.00624303	1.21
Brunol4	NM_133195	bruno-like 4 RNA binding protein (Drosophila)	1426929_at	108013	0.0008	3.0486	6864062	0.0051657	1.31
Btbd11	NM_028709	BTB (POZ) domain containing 11	1459838_s_at	74007	0	3.2699	6769481	0.0168462	1.41
Btc	NM_007568	betacellulin epidermal growth factor family member	1435541_at	12223	0	3.2461	6939931	0.00309223	1.91
C030045D06Rik	NM_001033636	RIKEN cDNA C030045D06 gene	1436569_at	109294	0.0005	-4.34405	6747565	0.0475478	-1.71
C1qtnf2	NM_026979	C1q and tumor necrosis factor related protein 2	1431079_at	69183	0	-3.14564	6780373	0.000693948	-1.71
C1qtnf7	NM_175425	C1q and tumor necrosis factor related protein 7	1429030_at	109323	0.0009	-2.23065	6930346	0.0158806	-1.11
C2	NM_013484	complement component 2 (within H-2S)	1416051_at	12263	0.0001	-3.5014	6855062	0.0185566	-1.21
C430004E15Rik	NM_175286	RIKEN cDNA C430004E15 gene	1426809_at	97031	0	3.5167	6875702	0.0149345	1.51
Cacna1d	NM_028981	calcium channel voltage-dependent L type alpha 1D subunit	1427974_s_at	12289	0.0001	-6.09013	6823659	0.023599	-1.41
Calcrl	NM_018782	calcitonin receptor-like	1418489_a_at	54598	0.0002	-4.78698	6888296	0.0404571	-1.41
Capn5	NM_007602	calpain 5	1418671_at	12337	0.0001	2.0774	6969640	0.000673214	1.41
Car14	NM_011797	carbonic anhydrase 14	1450725_s_at	23831	0.0001	-4.08163	6907224	0.0191426	-1.31
Car4	NM_007607	carbonic anhydrase 4	1418094_s_at	12351	0	-2.50313	6783144	0.000449692	-1.41
Card10	NM_130859	caspase recruitment domain family member 10	1449491_at	105844	0.0028	-2.28624	6837046	0.005422	-1.31
Casp3	NM_009810	caspase 3	1449839_at	12367	0.0001	2.1497	6975913	9.26299e-05	1.81
Cav1	NM_007616	caveolin caveolae protein 1	1449145_a_at	12389	0.0004	-2.07469	6944372	0.0411942	-1.31
Cblc	NM_023224	Casitas B-lineage lymphoma c	1422666_at	80794	0	2.5075	6973168	3.63621e-05	1.71
Cbln1	NM_019626	cerebellin 1 precursor protein	1423288_s_at	12404	0	11.1263	6983999	0.00252892	2.61
Ccbe1	NM_178793	collagen and calcium binding EGF domains 1	1437385_at	320924	0.0013	-3.19795	6866238	0.00103064	-1.31
Ccbl1	NM_172404	cysteine conjugate-beta lyase 1	1452678_a_at	70266	0.0002	2.1978	6885751	3.05352e-06	1.61
Ccbp2	NM_021609	chemokine binding protein 2	1422112_at	59289	0.0024	-3.99521	6993025	0.00982575	-1.51
Ccdc28b	NM_025455	coiled coil domain containing 28B	1459840_s_at	66264	0.0044	-2.33699	6925587	0.0249229	-1.21
Ccdc85a	NM_181577	coiled-coil domain containing 85A	1427157_at	216613	0.0004	-4.20168	6786914	0.00237779	-1.31
Ccna2	NM_009828	cyclin A2	1417910_at	12428	0.0001	2.1	6904300	9.69299e-05	1.91
Ccnb1	NM_172301	cyclin B1	1448205_at	268697	0	2.5649	6815558	0.000195006	1.91
Ccnb2	NM_007630	cyclin B2	1450920_at	12442	0	2.4012	6996646	0.00824657	1.81
Ccnd1	NM_007631	cyclin D1	1448698_at	12443	0.0001	2.1855	6972491	1.74291e-05	1.71
Ccnt2	NM_028399	cyclin T2	1427088_at	72949	0.0001	2.1217	6752869	2.01154e-05	1.31
Ccrl2	NM_017466	chemokine (C-C motif) receptor-like 2	1427736_a_at	54199	0.0002	-3.11818	6998919	0.0106426	-1.41
Cd14	NM_009841	CD14 antigen	1417268_at	12475	0.0017	2.9935	6864700	0.00952307	1.21
Cd177	NM_026862	CD177 antigen	1424509_at	68891	0	6.6823	6965885	0.000149954	3.11
Cd276	NM_133983	CD276 antigen	1417599_at	102657	0.0026	2.7873	6995999	5.20073e-05	1.31
Cd93	NM_010740	CD93 antigen	1419589_at	17064	0.0002	-3.09693	6891880	0.0107754	-1.61
Cd97	NM_011925	CD97 antigen	1418394_a_at	26364	0.0002	-3.04878	6983799	0.0405922	-1.61
Cdc20	NM_023223	cell division cycle 20 homolog (S. cerevisiae)	1416664_at	107995	0	2.5913	6924892	0.00588698	1.71
Cdc2a	NM_007659	cell division cycle 2 homolog A (S. pombe)	1448314_at	12534	0.0001	2.7753	6774794	0.00590611	1.61
Cdc42ep2	NM_026772	CDC42 effector protein (Rho GTPase binding) 2	1428750_at	104252	0.0001	-2.6976	6871163	0.001855	-1.31
Cdca2	NM_175384	cell division cycle associated 2	1455983_at	108912	0.0005	2.3884	6825544	0.000641636	1.61
Cdca3	NM_013538	cell division cycle associated 3	1452040_a_at	14793	0.0002	2.4342	6949814	0.00195557	1.31
Cdca7	NM_025866	cell division cycle associated 7	1428069_at	66953	0	2.484	6878053	2.30759e-06	1.61
Cdh13	NM_019707	cadherin 13	1423551_at	12554	0.0009	-2.88184	6979483	0.0121532	-1.21
Cdh2	NM_007664	cadherin 2	1418815_at	12558	0.0003	-2.6688	6863645	0.00721521	-1.21
Cdh5	NM_009868	cadherin 5	1433956_at	12562	0	-3.56761	6978695	0.0203062	-1.81
Cdkn1a	NM_007669	cyclin-dependent kinase inhibitor 1A (P21)	1424638_at	12575	0.0019	2.4118	6849595	0.0491773	2.21
Cdo1	NM_033037	cysteine dioxygenase 1 cytosolic	1448842_at	12583	0.0002	-4.84262	6865238	0.0190937	-2.21
Cdr2	NM_007672	cerebellar degeneration-related 2	1417430_at	12585	0.0006	-4.04694	6970944	0.0104071	-1.61
Celsr1	NM_009886	cadherin EGF LAG seven-pass G-type receptor 1	1418925_at	12614	0	3.526	6837604	8.41103e-06	2.21
Centd3	NM_139206	centaurin delta 3	1451282_at	106952	0	-4.99251	6864763	0.0155783	-1.61
Cep55	NM_028760	centrosomal protein 55	1452242_at	74107	0	3.1637	6869537	0.00057215	1.61
Cetn4	NM_145825	centrin 4	1436617_at	207175	0.0007	2.5257	6904330	0.0257647	1.41
Chek2	NM_016681	CHK2 checkpoint homolog (S. pombe)	1422747_at	50883	0	2.0829	6933459	0.000964439	1.41
Chia	NM_023186	chitinase acidic	1416456_a_at	81600	0	3.2909	6900239	1.1216e-06	4.51
Chl1	NM_007697	cell adhesion molecule with homology to L1CAM	1435190_at	12661	0.0001	12.3135	6948759	0.00136434	2.11
Chrdl1	NM_031258	chordin-like 1	1434201_at	83453	0.0003	-6.28141	7019944	0.017792	-1.61
Chst11	NM_021439	carbohydrate sulfotransferase 11	1428902_at	58250	0.0012	-2.69034	6769366	0.0175411	-1.41
Chst2	NM_018763	carbohydrate sulfotransferase 2	1422758_at	54371	0.0008	-2.15936	6997990	0.0485589	-1.51
Cidec	NM_178373	cell death-inducing DFFA-like effector c	1452260_at	14311	0	-3.29056	6956558	0.00128044	-1.41
Ckmt1	NM_009897	creatine kinase mitochondrial 1 ubiquitous	1432418_a_at	12716	0.0062	5.256	6880639	3.81555e-05	3.21
Clcn5	NM_016691	chloride channel 5	1420295_x_at	12728	0.0001	2.3359	7015375	1.36518e-05	1.91
Cldn2	NM_016675	claudin 2	1417231_at	12738	0	13.317	7014115	8.63153e-05	4.51
Cldn3	NM_009902	claudin 3	1451701_x_at	12739	0.0001	2.9515	6934890	3.66234e-05	2.71
Cldn4	NM_009903	claudin 4	1418283_at	12740	0.0001	8.436	6942401	1.51296e-05	4.01
Cldn7	NM_016887	claudin 7	1448393_at	53624	0	2.7189	6782087	0.0083705	2.01
Clec1b	NM_019985	C-type lectin domain family 1 member b	1421182_at	56760	0.0001	-2.89855	6950147	0.0429029	-1.21
Clec2d	NM_053109	C-type lectin domain family 2 member d	1419477_at	93694	0.0035	-2.20556	6950125	0.000890417	-1.51
Clic6	NM_172469	chloride intracellular channel 6	1434165_at	209195	0.0004	2.4097	6843244	0.0078122	2.21
Clstn2	NM_022319	calsyntenin 2	1441165_s_at	64085	0.0001	-3.20616	7022688	0.00970238	-1.51
Clu	NM_013492	clusterin	1437689_x_at	12759	0	2.537	6819887	8.46325e-06	3.81
Cmklr1	NM_008153	chemokine-like receptor 1	1456887_at	14747	0	-3.80084	6941173	0.00209117	-1.41
Cnr2	NM_009924	cannabinoid receptor 2 (macrophage)	1450476_at	12802	0.0001	-2.23115	6917789	0.0259571	-1.31
Col12a1	NM_007730	procollagen type XII alpha 1	1434411_at	12816	0.001	-2.55232	6997197	0.00691813	-1.21
Col13a1	NM_007731	procollagen type XIII alpha 1	1422866_at	12817	0	-3.81971	6774371	0.00170451	-1.41
Col18a1	NM_009929	procollagen type XVIII alpha 1	1426955_at	12822	0.0001	2.1148	6775201	0.0260313	1.11
Col23a1	NM_153393	procollagen type XXIII alpha 1	1429209_at	237759	0.002	-2.70563	6780856	0.015168	-1.21
Colec12	NM_130449	collectin sub-family member 12	1419693_at	140792	0.0011	-2.3359	6858773	0.0474862	-1.01
Cpm	XM_984852	carboxypeptidase M	1453009_at	70574	0.0001	2.3093	6771024	9.82657e-06	1.81
Cpsf2	NM_016856	cleavage and polyadenylation specific factor 2	1431089_at	51786	0.0003	2.3505	6797474	0.00381661	1.21
Crispld2	NM_030209	cysteine-rich secretory protein LCCL domain containing 2	1460458_at	78892	0.0001	-4.0016	6979520	0.000385656	-1.61
Crlf1	NM_018827	cytokine receptor-like factor 1	1418476_at	12931	0	3.382	6977006	0.0056587	1.91
Csf1	NM_007778	colony stimulating factor 1 (macrophage)	1460220_a_at	12977	0	-3.01114	6908048	0.0352172	-1.41
Csf3r	NM_007782	colony stimulating factor 3 receptor (granulocyte)	1418806_at	12986	0.0001	-3.29056	6917120	0.00709974	-1.41
Cspg4	NM_139001	chondroitin sulfate proteoglycan 4	1423341_at	121021	0	-2.09952	6989349	0.00145249	-1.41
Ctla2a	NM_007796	cytotoxic T lymphocyte-associated protein 2 alpha	1416811_s_at	13024	0	-3.18573	6813742	0.0274771	-1.41
Ctsc	NM_009982	cathepsin C	1437939_s_at	13032	0.0006	2.9964	6962376	1.14683e-06	2.11
Ctsh	NM_007801	cathepsin H	1418365_at	13036	0.0001	2.1107	6991264	0.00023819	2.21
Ctxn1	NM_183315	cortexin 1	1435083_at	330695	0.0001	2.2857	6980122	0.000418798	1.81
Cxcl12	NM_001012477	chemokine (C-X-C motif) ligand 12	1417574_at	20315	0	-3.56633	6949335	0.00814146	-1.31
Cxcl14	NM_019568	chemokine (C-X-C motif) ligand 14	1418456_a_at	57266	0.0024	-2.26501	6813480	0.0104894	-1.41
Cyp1b1	NM_009994	cytochrome P450 family 1 subfamily b polypeptide 1	1416612_at	13078	0	6.504	6857483	0.000134935	3.01
Cyp27a1	NM_024264	cytochrome P450 family 27 subfamily a polypeptide 1	1417590_at	104086	0.0003	-2.72257	6750566	0.040722	-1.11
Cyp2b10	NM_009998	cytochrome P450 family 2 subfamily b polypeptide 10	1451787_at	13088	0.0034	-3.03767	6959250	0.000914558	-1.51
Cyp4b1	AK078882	cytochrome P450 family 4 subfamily b polypeptide 1	1416194_at	13120	0.0001	-2.7972	6924721	0.00297776	-1.61
D030011O10Rik	NM_177192	RIKEN cDNA D030011O10 gene	1455340_at	320560	0	-2.73299	6958439	0.0200375	-1.41
D10Ertd610e	NM_028027	DNA segment Chr 10 ERATO Doi 610 expressed	1419978_s_at	52666	0.0003	-2.05128	6777917	0.0167911	-1.11
D12Ertd553e	BC049664	DNA segment Chr 12 ERATO Doi 553 expressed	1454806_at	76820	0.0001	-3.24886	6793416	0.0115449	-1.51
D17H6S56E-5	NM_033075	DNA segment Chr 17 human D6S56E 5	1417822_at	110956	0	3.0431	6855068	0.000476474	3.51
D230012E17Rik	AK051866	RIKEN cDNA D230012E17 gene	1436317_at	241062	0.0001	2.8144	6758704	6.20594e-05	2.01
D2Ertd750e	NM_026412	DNA segment Chr 2 ERATO Doi 750 expressed	1420081_s_at	51944	0	2.5483	6880468	0.00155734	1.51
D330027H18Rik	XM_149840	RIKEN cDNA D330027H18 gene	1439728_at	101359	0.0002	-4.73709	6952338	0.0106924	-1.71
Dclk1	NM_019978	doublecortin-like kinase 1	1435940_at	13175	0.0024	2.5896	6897599	5.91884e-05	1.61
Dcxr	NM_026428	dicarbonyl L-xylulose reductase	1419456_at	67880	0.0001	2.6998	6792813	1.24101e-06	1.81
Ddah1	NM_026993	dimethylarginine dimethylaminohydrolase 1	1454995_at	69219	0.0001	-2.75786	6902162	0.00304448	-1.41
Ddc	NM_016672	dopa decarboxylase	1426215_at	13195	0.0004	-2.67523	6786045	0.00639191	-1.11
Ddr2	NM_022563	discoidin domain receptor family member 2	1455688_at	18214	0.0001	-2.10393	6764010	0.0260894	-1.21
Dennd2a	NM_172477	DENN/MADD domain containing 2A	1433500_at	209773	0.0001	-2.82167	6952950	0.00103439	-1.31
Dennd2d	NM_028110	DENN/MADD domain containing 2D	1451363_a_at	72121	0.0002	2.0749	6900254	5.81068e-05	1.41
Des	NM_010043	desmin	1426731_at	13346	0.0008	-2.40906	6750625	0.0130106	-1.31
Dgkg	NM_138650	diacylglycerol kinase gamma	1431167_at	110197	0	-3.59583	6844567	0.00367541	-1.31
Dlk1	NM_010052	delta-like 1 homolog (Drosophila)	1449939_s_at	13386	0.0012	4.5054	6797978	1.77275e-05	2.31
Dmd	NM_007868	dystrophin muscular dystrophy	1417307_at	13405	0.0015	-2.36351	7012305	0.00268998	-1.31
Dmkn	NM_172899	dermokine	1428781_at	73712	0	3.7152	6959617	0.00294542	2.21
Dmn	NM_207663	desmuslin	1455610_at	233335	0.0001	-2.94204	6968041	0.00224876	-1.61
Dmpk	NM_032418	dystrophia myotonica-protein kinase	1434944_at	13400	0	-2.3218	6958984	0.0044201	-1.41
Dos	NM_015761	downstream of Stk11	1438370_x_at	216164	0	3.6256	6775343	9.59024e-05	1.61
Dpep1	NM_007876	dipeptidase 1 (renal)	1435943_at	13479	0.0002	-5.00751	6979680	0.00441472	-1.51
Dpt	NM_019759	dermatopontin	1418511_at	56429	0.0001	-2.52525	6754735	0.043589	-1.41
Dpyd	NM_170778	dihydropyrimidine dehydrogenase	1427946_s_at	99586	0.0003	-3.56506	6900821	0.00105193	-1.11
Dsg2	NM_007883	desmoglein 2	1439476_at	13511	0.0001	2.7617	6859285	0.0469883	1.81
Dusp4	NM_176933	dual specificity phosphatase 4	1428834_at	319520	0.0003	2.4012	6975335	0.000137655	1.81
Dusp6	NM_026268	dual specificity phosphatase 6	1415834_at	67603	0.0001	2.0365	6770160	4.84761e-05	2.11
Dyrk3	NM_145508	dual-specificity tyrosine-(Y)-phosphorylation regulated kinase 3	1424229_at	226419	0	4.5844	6762141	0.00657525	1.41
E130112L23Rik	BC058405	RIKEN cDNA E130112L23 gene	1436768_x_at	268739	0	2.009	6819032	0.000155296	1.51
E130203B14Rik	NM_178791	RIKEN cDNA E130203B14 gene	1455050_at	320736	0	-2.62674	6818104	0.0242792	-1.21
Ect2	NM_007900	ect2 oncogene	1419513_a_at	13605	0.0042	3.02	6903753	0.000121731	1.81
Edg1	NM_007901	endothelial differentiation sphingolipid G-protein-coupled receptor 1	1423571_at	13609	0.0013	-3.02024	6908461	0.0105278	-1.61
Edg3	NM_010101	endothelial differentiation sphingolipid G-protein-coupled receptor 3	1437173_at	13610	0	-3.48675	6807007	0.0416212	-1.51
Edil3	NM_010103	EGF-like repeats and discoidin I-like domains 3	1433474_at	13612	0	-3.53982	6808773	0.0105663	-1.41
Edn1	NM_010104	endothelin 1	1451924_a_at	13614	0.0044	-3.30142	6806566	0.00148301	-1.61
Ednra	NM_010332	endothelin receptor type A	1433525_at	13617	0	-2.2604	6983531	0.0124617	-1.31
Ednrb	NM_007904	endothelin receptor type B	1437347_at	13618	0.0003	-5.49753	6827159	0.0130247	-2.11
Efemp1	NM_146015	epidermal growth factor-containing fibulin-like extracellular matrix protein 1	1427183_at	216616	0.0005	-3.28623	6779672	0.000374492	-1.61
Egfl7	NM_178444	EGF-like domain 7	1421335_a_at	353156	0	-3.82995	6875803	0.0302505	-1.41
Egfr	NM_207655	epidermal growth factor receptor	1424932_at	13649	0	-2.82167	6778972	0.00919293	-1.31
Egr1	NM_007913	early growth response 1	1417065_at	13653	0.0019	3.2918	6859972	0.00468141	2.01
Ehd1	NM_010119	EH-domain containing 1	1416012_at	13660	0	-3.1407	6867849	0.000624475	-1.61
Elf5	NM_010125	E74-like factor 5	1419556_at	13711	0.0016	2.437	6879610	0.000272846	1.81
Eln	NM_007925	elastin	1420855_at	13717	0.0001	3.8823	6942380	0.000151486	1.81
Elovl7	NM_029001	ELOVL family member 7 elongation of long chain fatty acids (yeast)	1440312_at	74559	0.0008	2.404	6810063	0.00126154	1.81
Eltd1	NM_133222	EGF latrophilin seven transmembrane domain containing 1	1418058_at	170757	0	-3.6245	6902440	0.0337801	-1.61
Emid1	NM_080595	EMI domain containing 1	1449581_at	140703	0.0026	-2.46124	6785698	0.00195901	-1.21
Emilin2	NM_145158	elastin microfibril interfacer 2	1435264_at	246707	0.0008	-2.33427	6857065	0.00626069	-1.21
Eml1	NM_001043336	echinoderm microtubule associated protein like 1	1428321_at	68519	0	-3.37724	6797898	0.00993609	-1.21
Eml2	AK200420	echinoderm microtubule associated protein like 2	1428173_at	72205	0	2.4163	6958993	1.08401e-05	1.91
Enc1	NM_007930	ectodermal-neural cortex 1	1450061_at	13803	0.0001	2.5413	6809272	0.000246522	2.21
Eng	NM_007932	endoglin	1432176_a_at	13805	0.0002	-3.85505	6876212	0.0126515	-1.81
Epb4.1l2	BC055044	erythrocyte protein band 4.1-like 2	1433490_s_at	13822	0	-2.22916	6766705	0.0471706	-1.21
Epb4.1l3	NM_013813	erythrocyte protein band 4.1-like 3	1419062_at	13823	0.0005	-3.36247	6851897	0.0434885	-1.21
Epb4.9	NM_013514	erythrocyte protein band 4.9	1460223_a_at	13829	0	-2.39981	6825713	0.00121001	-1.31
Epdr1	NM_134065	ependymin related protein 1 (zebrafish)	1450380_at	105298	0	3.3111	6811366	0.00289915	1.31
Epha2	NM_010139	Eph receptor A2	1421151_a_at	13836	0.0001	2.1518	6918158	0.000477856	1.91
Epha7	NM_010141	Eph receptor A7	1451991_at	13841	0.0001	3.3289	6912371	6.80766e-05	1.81
Ephb4	NM_010144	Eph receptor B4	1449845_a_at	13846	0.0001	-2.33918	6935064	0.0092809	-1.21
Eps8	NM_007945	epidermal growth factor receptor pathway substrate 8	1422823_at	13860	0.0003	-2.6688	6957789	0.00287723	-1.31
Erbb2	NM_001003817	v-erb-b2 erythroblastic leukemia viral oncogene homolog 2 neuro/glioblastoma derived oncogene homolog (avian)	1424919_at	13866	0.0001	2.3175	6784005	1.06048e-05	1.61
Erbb3	NM_010153	v-erb-b2 erythroblastic leukemia viral oncogene homolog 3 (avian)	1434606_at	13867	0	2.3054	6778044	2.92495e-06	2.11
Erc2	NM_177814	ELKS/RAB6-interacting/CAST family member 2	1434582_at	238988	0.0001	-3.24992	6817738	0.0348812	-1.21
Ereg	NM_007950	epiregulin	1419431_at	13874	0	12.3239	6932387	0.00419714	4.71
Etv4	NM_008815	ets variant gene 4 (E1A enhancer binding protein E1AF)	1423232_at	18612	0	35.1597	6791519	0.00502092	1.41
Evc	NM_021292	Ellis van Creveld gene homolog (human)	1448876_at	59056	0.0007	-2.21877	6937542	0.000629986	-1.31
Evc2	NM_145920	Ellis van Creveld syndrome 2 homolog (human)	1429447_at	68525	0.0023	-2.6688	6930023	0.0100971	-1.21
Eya2	NM_010165	eyes absent 2 homolog (Drosophila)	1424127_at	14049	0	2.0237	6883186	0.0494039	1.21
F13a1	NM_028784	coagulation factor XIII A1 subunit	1448929_at	74145	0.0004	-3.63769	6812386	0.0492168	-1.21
F3	NM_010171	coagulation factor III	1417408_at	14066	0	3.0565	6900970	0.00302027	1.91
F5	NM_007976	coagulation factor V	1418907_at	14067	0.0007	-4.58295	6754691	0.00693647	-1.51
F730031O20Rik	NM_001080820	RIKEN cDNA F730031O20 gene	1444426_at	320664	0.0004	-4.80538	6883604	0.0263594	-1.31
Fabp3	NM_010174	fatty acid binding protein 3 muscle and heart	1416023_at	14077	0.0004	-2.58799	6917374	0.00184783	-1.71
Faim2	NM_028224	Fas apoptotic inhibitory molecule 2	1429518_at	72393	0.0001	-4.329	6838460	0.00247169	-1.81
Faim3	NM_026976	Fas apoptotic inhibitory molecule 3	1429889_at	69169	0.0015	-2.23214	6753005	0.0193739	-1.51
Fat1	NM_001081286	FAT tumor suppressor homolog 1 (Drosophila)	1433857_at	14107	0	2.2028	6975850	4.08031e-08	1.91
Fat2	NM_001029988	FAT tumor suppressor homolog 2 (Drosophila)	1457135_at	245827	0.0004	2.338	6788407	9.9585e-07	1.71
Fat3	NM_001080814	FAT tumor suppressor homolog 3 (Drosophila)	1457589_at	270120	0.0056	-2.82406	6993501	0.000427983	-1.31
Fbln5	NM_011812	fibulin 5	1416164_at	23876	0	-2.04541	6803133	0.0499518	-1.31
Fbxo30	NM_027968	F-box protein 30	1436550_at	71865	0.0001	-2.6448	6765973	0.0317359	-1.21
Fetub	NM_021564	fetuin beta	1449555_a_at	59083	0	10.8086	6840094	4.98885e-05	4.71
Fez2	NM_199448	fasciculation and elongation protein zeta 2 (zygin II)	1434348_at	225020	0.0001	-2.30681	6857415	0.00239902	-1.31
Fgd5	NM_172731	FYVE RhoGEF and PH domain containing 5	1460578_at	232237	0.0002	-3.19591	6948034	0.000190253	-1.51
Fgf7	NM_008008	fibroblast growth factor 7	1438405_at	14178	0.0001	-3.95883	6880900	0.0197188	-1.41
Fgfr4	NM_008011	fibroblast growth factor receptor 4	1418596_at	14186	0	-7.73395	6807214	0.000602811	-1.81
Fhl1	NM_001077362	four and a half LIM domains 1	1417872_at	14199	0.0001	-2.15471	7011394	0.0209377	-1.31
Figf	NM_010216	c-fos induced growth factor	1438954_x_at	14205	0.0003	-6.42674	7015007	0.0069803	-2.01
Fmo2	NM_018881	flavin containing monooxygenase 2	1453435_a_at	55990	0.0021	-3.72024	6763626	0.0104903	-1.61
Fmo5	NM_010232	flavin containing monooxygenase 5	1450332_s_at	14263	0	-3.07977	6899835	0.0226691	-1.31
Foxf1a	NM_010426	forkhead box F1a	1434939_at	15227	0	-3.47464	6979570	0.0206793	-1.61
Foxp2	NM_053242	forkhead box P2	1458191_at	114142	0.0187	3.3924	6944262	4.57764e-07	2.11
Foxq1	NM_008239	forkhead box Q1	1422735_at	15220	0	2.8608	6805878	0.000201634	2.41
Frk	NM_010237	fyn-related kinase	1436413_at	14302	0.0002	2.6538	6767094	3.08332e-05	1.71
Fst	NM_008046	follistatin	1421365_at	14313	0.0127	4.0767	6816226	0.00622481	1.91
Fut2	NM_018876	fucosyltransferase 2	1434862_at	14344	0.0001	5.8843	6967001	0.000173816	2.81
Fxyd1	NM_194321	FXYD domain-containing ion transport regulator 1	1421374_a_at	56188	0.0001	-3.82555	6966339	0.00020968	-2.11
Fyn	NM_008054	Fyn proto-oncogene	1448765_at	14360	0.0003	-2.21582	6767258	0.0124654	-1.21
G0s2	NM_008059	G0/G1 switch gene 2	1448700_at	14373	0.0003	-5.88235	6765327	0.000420129	-1.01
Gabpb1	AK139710	GA repeat binding protein beta 1	1419761_a_at	14391	0.0001	2.4563	6890638	0.000823218	1.51
Galnt3	NM_015736	UDP-N-acetyl-alpha-D-galactosamine:polypeptide N-acetylgalactosaminyltransferase 3	1417588_at	14425	0	2.0766	6887337	0.00276081	1.81
Galntl4	NM_173739	UDP-N-acetyl-alpha-D-galactosamine:polypeptide N-acetylgalactosaminyltransferase-like 4	1454780_at	233733	0	-2.51699	6970484	0.0453116	-1.31
Gap43	NM_008083	growth associated protein 43	1423537_at	14432	0.0006	-4.82625	6845800	0.00253486	-1.71
Gata2	NM_008090	GATA binding protein 2	1428816_a_at	14461	0	-4.08831	6947763	0.000714672	-1.81
Gata3	NM_008091	GATA binding protein 3	1448886_at	14462	0.0027	-3.427	6884642	0.0424932	-1.41
Gata5	NM_008093	GATA binding protein 5	1450125_at	14464	0.0017	-2.33318	6894187	0.0317967	-1.21
Gbp2	NM_010260	guanylate nucleotide binding protein 2	1418240_at	14469	0.0008	-2.3753	6901957	0.0101643	-1.31
Gbp3	NM_018734	guanylate nucleotide binding protein 3	1418392_a_at	55932	0.0001	-2.56608	6901953	0.0163406	-1.41
Gbp6	NM_145545	guanylate binding protein 6	1434380_at	229900	0.0003	-3.10463	6901950	0.0169571	-1.31
Gch1	NM_008102	GTP cyclohydrolase 1	1429692_s_at	14528	0	2.0971	6824321	0.00533935	1.41
Gdnf	NM_010275	glial cell line derived neurotrophic factor	1419080_at	14573	0	2.4963	6828547	4.27817e-05	1.61
Ggh	NM_010281	gamma-glutamyl hydrolase	1419595_a_at	14590	0.0001	-2.07857	6912042	0.0222671	-1.21
Ggta1	NM_010283	glycoprotein galactosyltransferase alpha 1 3	1418483_a_at	14594	0	-2.59471	6886045	0.00258819	-1.31
Ghr	NM_010284	growth hormone receptor	1451501_a_at	14600	0.0005	-2.8885	6833531	0.0359155	-1.31
Gja5	NM_008121	gap junction membrane channel protein alpha 5	1429101_at	14613	0.0058	-5.33049	6899791	0.0295918	-1.51
Gja7	NM_008122	gap junction membrane channel protein alpha 7	1449094_at	14615	0	-3.60231	6791637	0.0077502	-1.51
Gjb1	NM_008124	gap junction membrane channel protein beta 1	1448767_s_at	14618	0.0267	3.4076	7012866	0.000264763	1.91
Gjb2	NM_008125	gap junction membrane channel protein beta 2	1423271_at	14619	0	3.9211	6824932	7.58883e-05	-1.01
Gjb3	NM_008126	gap junction membrane channel protein beta 3	1416715_at	14620	0	6.1729	6925430	0.000147008	1.91
Gjb4	NM_008127	gap junction membrane channel protein beta 4	1422179_at	14621	0.0001	11.139	6925434	0.00243452	2.51
Gjb6	NM_001010937	gap junction membrane channel protein beta 6	1448397_at	14623	0	3.3451	6824940	0.00235706	1.11
Gkn2	NM_025467	gastrokine 2	1453132_a_at	66284	0	31.0693	6947692	0.000764032	3.11
Glis2	NM_031184	GLIS family zinc finger 2	1416598_at	83396	0	-2.03169	6839052	0.00965465	-1.41
Glrx	NM_053108	glutaredoxin	1416592_at	93692	0.0001	2.9872	6808314	0.00284112	1.91
Gm1337	XM_980501	gene model 1337 (NCBI)	1443287_at	383787	0.0001	-6.77966	6890142	0.0264954	-1.31
Gm166	BC066021	gene model 166 (NCBI)	1434634_at	233899	0	2.0278	6971387	0.000240021	1.61
Gm1752	XM_001001634	gene model 1752 (NCBI)	1436941_at	385658	0.0001	-3.29598	6846376	0.0197436	-1.51
Gm71	NM_001033236	gene model 71 (NCBI)	1455726_at	207965	0	3.5118	6801485	0.000724314	1.81
Gm944	NM_001033445	gene model 944 (NCBI)	1436827_at	381126	0.0008	2.8862	6863799	4.85278e-07	1.51
Gm98	AK141695	gene model 98 (NCBI)	1439506_at	225908	0.0003	-4.38212	6871478	0.00734616	-1.51
Gmfg	NM_001039192	glia maturation factor gamma	1419193_a_at	63986	0	-2.15796	6959421	6.36174e-05	-1.41
Gnao1	NM_010308	guanine nucleotide binding protein alpha o	1421152_a_at	14681	0.0143	-2.36855	6978263	0.000832671	-1.71
Gng11	NM_025331	guanine nucleotide binding protein (G protein) gamma 11	1448942_at	66066	0	-2.94551	6943797	0.00101824	-1.71
Gpam	NM_008149	glycerol-3-phosphate acyltransferase mitochondrial	1419499_at	14732	0.0006	-2.49377	6873887	0.0232889	-1.31
Gpc3	NM_016697	glypican 3	1450990_at	14734	0.0004	-3.92311	7016826	0.0020381	-1.81
Gpc6	NM_011821	glypican 6	1428774_at	23888	0	9.9125	6821985	0.00330416	1.91
Gpihbp1	NM_026730	GPI-anchored HDL-binding protein 1	1453022_at	68453	0	-3.07409	6831591	0.000241235	-1.81
Gpm6a	NM_153581	glycoprotein m6a	1456741_s_at	234267	0.0001	-7.50188	6976214	0.0183852	-1.61
Gpm6b	NM_023122	glycoprotein m6b	1423091_a_at	14758	0	-3.28947	7015061	0.00357617	-1.41
Gpr120	NM_181748	G protein-coupled receptor 120	1439489_at	107221	0	2.3509	6869543	9.43779e-06	2.21
Gpr124	NM_054044	G protein-coupled receptor 124	1418379_s_at	78560	0	-2.4975	6974832	0.00460483	-1.31
Gpr56	NM_018882	G protein-coupled receptor 56	1433485_x_at	14766	0	3.2333	6978354	1.90809e-07	2.31
Gprc5c	NM_147217	G protein-coupled receptor family C group 5 member C	1424450_at	70355	0.0007	3.509	6785104	1.71762e-05	2.21
Gpsm3	NM_134116	G-protein signalling modulator 3 (AGS3-like C. elegans)	1418396_at	106512	0.0002	-2.11327	6850055	0.0376911	-1.21
Gpt2	NM_173866	glutamic pyruvate transaminase (alanine aminotransferase) 2	1455007_s_at	108682	0.0002	2.1336	6977814	0.0395628	1.41
Gpx2	NM_030677	glutathione peroxidase 2	1449279_at	14776	0	4.7363	6801914	0.0045329	2.81
Grap	NM_027817	GRB2-related adaptor protein	1429387_at	71520	0	-3.17259	6781525	0.033188	-1.31
Grb10	NM_010345	growth factor receptor bound protein 10	1425458_a_at	14783	0.0001	-2.07039	6786046	0.0158503	-1.21
Grb7	NM_010346	growth factor receptor bound protein 7	1448227_at	14786	0	2.5008	6784008	8.59434e-05	2.01
Grhl2	NM_026496	grainyhead-like 2 (Drosophila)	1427046_at	252973	0.0001	2.4236	6829871	6.49862e-05	1.71
Gria3	NM_016886	glutamate receptor ionotropic AMPA3 (alpha 3)	1434728_at	53623	0.0003	-3.86548	7010835	0.017429	-1.31
Grtp1	NM_025768	GH regulated TBC protein 1	1425891_a_at	66790	0.0001	-3.96354	6980526	0.0053852	-1.31
Gsta4	NM_010357	glutathione S-transferase alpha 4	1416368_at	14860	0	5.4946	6990685	0.000773767	3.01
Gstm1	NM_010358	glutathione S-transferase mu 1	1425627_x_at	14862	0	-2.24921	6908078	0.0165279	-1.21
Gstm2	NM_008183	glutathione S-transferase mu 2	1416411_at	14863	0	-2.98418	6908079	0.0164968	-1.31
Gucy1a3	NM_021896	guanylate cyclase 1 soluble alpha 3	1420534_at	60596	0	-2.80426	6906328	0.0282628	-1.81
Gucy1b3	NM_017469	guanylate cyclase 1 soluble beta 3	1420871_at	54195	0.0023	-3.12891	6906325	0.040573	-1.71
Gulp1	NM_027506	GULP engulfment adaptor PTB domain containing 1	1434423_at	70676	0.0002	-3.31236	6749115	0.00231777	-1.41
Gvin1	NM_029000	GTPase very large interferon inducible 1	1429184_at	74558	0.0003	-2.74273	6970164	0.0417803	-1.41
Gyg	NM_013755	glycogenin	1448429_at	27357	0.001	-2.72109	6903549	0.0364221	-1.51
Gyk	NM_008194	glycerol kinase	1422703_at	14933	0.0002	3.26	7018041	6.56216e-05	1.51
Gypc	NM_001048207	glycophorin C	1423878_at	71683	0	-2.53614	6864404	0.0299525	-1.21
Gzma	NM_010370	granzyme A	1417898_a_at	14938	0.0002	-2.80584	6816160	0.0180916	-1.31
Hba-a1	NM_008218	hemoglobin alpha adult chain 1	1417714_x_at	15122	0.0003	-3.53857	6779840	0.000380725	-1.51
Hbegf	NM_010415	heparin-binding EGF-like growth factor	1418349_at	15200	0.0005	2.2185	6864680	0.00124344	1.81
Hdc	NM_008230	histidine decarboxylase	1454713_s_at	15186	0.0001	2.199	6890636	0.000965381	1.81
Hdgfrp3	NM_013886	hepatoma-derived growth factor related protein 3	1435977_at	29877	0	-3.66972	6968871	0.021166	-1.41
Hecw1	AK086170	HECT C2 and WW domain containing E3 ubiquitin protein ligase 1	1456527_at	94253	0.0001	7.562	6811136	2.43416e-06	2.21
Hecw2	NM_001001883	HECT C2 and WW domain containing E3 ubiquitin protein ligase 2	1458464_at	329152	0.0254	-3.66166	6758694	0.00402108	-1.71
Heph	NM_010417	hephaestin	1448696_at	15203	0	-2.90107	7012696	0.0475361	-1.11
Hey1	NM_010423	hairy/enhancer-of-split related with YRPW motif 1	1415999_at	15213	0.0016	-3.35121	6903088	0.00401613	-1.41
Hgfac	NM_019447	hepatocyte growth factor activator	1418405_at	54426	0	3.6969	6929865	0.0023877	1.81
Hhex	NM_008245	hematopoietically expressed homeobox	1423319_at	15242	0.001	2.7931	6869509	0.000528149	2.01
Hip1	NM_146001	huntingtin interacting protein 1	1434557_at	215114	0	-2.3663	6942441	0.00611532	-1.41
Hivep3	NM_010657	human immunodeficiency virus type I enhancer binding protein 3	1458802_at	16656	0.0016	-2.01167	6916775	0.0063481	-1.21
Hlf	NM_172563	hepatic leukemia factor	1434736_at	217082	0.0228	-4.22476	6790699	0.00963393	-1.41
Hmcn1	BC016539	hemicentin 1	1438532_at	545370	0.0001	-3.76364	6762974	0.0454025	-1.71
Hmgb3	NM_008253	high mobility group box 3	1416155_at	15354	0	2.7735	7011852	2.29342e-05	1.41
Hmmr	AK020144	hyaluronan mediated motility receptor (RHAMM)	1425815_a_at	15366	0.0006	2.9759	6787469	0.000524672	1.31
Hn1l	NM_198937	hematological and neurological expressed 1-like	1433696_at	52009	0	2.5835	6854401	0.0061881	1.91
Hnmt	NM_080462	histamine N-methyltransferase	1417702_a_at	140483	0	2.5352	6885325	0.000738984	1.51
Hook1	NM_030014	hook homolog 1 (Drosophila)	1438018_at	77963	0	2.5367	6915567	0.0031566	1.51
Hook2	NM_133255	hook homolog 2 (Drosophila)	1419350_at	170833	0.0007	2.3348	6977779	0.00532386	1.31
Hpgd	NM_008278	hydroxyprostaglandin dehydrogenase 15 (NAD)	1419906_at	15446	0.0011	-4.3802	6976237	0.0215674	-1.31
Hpn	NM_008281	hepsin	1420712_a_at	15451	0	5.0822	6966354	0.000133638	2.11
Hs3st3b1	AF168992	heparan sulfate (glucosamine) 3-O-sulfotransferase 3B1	1433977_at	54710	0.0002	3.3664	6788991	3.14723e-05	2.01
Hsd11b1	NM_001044751	hydroxysteroid 11-beta dehydrogenase 1	1449038_at	15483	0	-2.74123	6765325	0.0104299	-1.41
Hsd17b10	NM_016763	hydroxysteroid (17-beta) dehydrogenase 10	1438391_x_at	15108	0.0003	2.2888	7014557	0.000570606	1.51
Hspa12b	NM_028306	heat shock protein 12B	1460371_at	72630	0	-4.24088	6881237	0.00651182	-1.51
Hyal1	NM_008317	hyaluronoglucosaminidase 1	1449954_at	15586	0.0092	-2.90613	6992224	0.0145922	-1.61
Hyal2	NM_010489	hyaluronoglucosaminidase 2	1448679_at	15587	0.0008	-2.57798	6992221	3.10448e-05	-1.41
Icam2	NM_010494	intercellular adhesion molecule 2	1448862_at	15896	0	-3.89105	6791918	0.0087871	-1.51
Ick	NM_019987	intestinal cell kinase	1455687_at	56542	0	2.0719	6990683	0.000577677	1.31
Ier3	NM_133662	immediate early response 3	1419647_a_at	15937	0	-2.26244	6850191	0.0325724	-1.21
Ifi27	NM_029803	interferon alpha-inducible protein 27	1426278_at	76933	0.0048	-2.47219	6803210	0.00167325	-1.41
Ifi44	NM_133871	interferon-induced protein 44	1423555_a_at	99899	0.0019	-2.22272	6910592	0.0335994	-1.21
Ifitm1	BC090972	interferon induced transmembrane protein 1	1424254_at	68713	0.0012	-2.71297	6965146	0.00395005	-1.51
Ift80	NM_026641	intraflagellar transport 80 homolog (Chlamydomonas)	1427568_a_at	68259	0.0001	2.4121	6905818	8.28584e-06	1.71
Igf1	NM_184052	insulin-like growth factor 1	1437401_at	16000	0.0004	2.3698	6769597	0.0245882	1.61
Igf2	NM_010514	insulin-like growth factor 2	1448152_at	16002	0.0001	-2.19346	6972317	0.0231482	-1.01
Igfbp2	NM_008342	insulin-like growth factor binding protein 2	1454159_a_at	16008	0.0002	-6.51466	6750440	0.0218773	-1.61
Igfbp3	NM_008343	insulin-like growth factor binding protein 3	1423062_at	16009	0.0002	-6.84932	6785865	0.000328116	-2.21
Igfbp4	NM_010517	insulin-like growth factor binding protein 4	1437406_x_at	16010	0.008	-2.16873	6784062	0.00623733	-1.41
Igfbp5	NM_010518	insulin-like growth factor binding protein 5	1452114_s_at	16011	0.0153	-2.95159	6759664	0.0127024	-1.31
Igfbp6	NM_008344	insulin-like growth factor binding protein 6	1417933_at	16012	0.0001	-3.76081	6833393	0.00039797	-1.61
Igsf3	NM_207205	immunoglobulin superfamily member 3	1455048_at	78908	0	2.5524	6900014	0.000942069	1.71
Il17rd	NM_134437	interleukin 17 receptor D	1429893_at	171463	0	-3.29056	6817694	0.0163154	-1.31
Il18rap	NM_010553	interleukin 18 receptor accessory protein	1456545_at	16174	0	2.9648	6748893	1.9142e-06	2.51
Il4i1	NM_010215	interleukin 4 induced 1	1419192_at	14204	0.0011	2.319	6960301	0.0260559	-1.21
Impdh1	NM_011829	inosine 5'-phosphate dehydrogenase 1	1423239_at	23917	0	-3.28192	6952340	0.0265724	-1.41
Inhbb	NM_008381	inhibin beta-B	1426858_at	16324	0	3.6216	6761666	0.000680365	1.51
Iqgap2	AK042038	IQ motif containing GTPase activating protein 2	1433885_at	544963	0.0002	2.1675	6815272	0.00526808	1.31
Iqgap3	NM_001033484	IQ motif containing GTPase activating protein 3	1434850_at	404710	0	2.3913	6899053	0.0078656	1.71
Itga1	NM_001033228	integrin alpha 1	1439713_at	109700	0.0495	-4.54545	6816248	0.0493735	-1.71
Itga2b	NM_010575	integrin alpha 2b	1417758_at	16399	0.0003	-2.77162	6791570	0.0464453	-1.31
Itga4	AK156517	integrin alpha 4	1436037_at	16401	0.0025	-2.18436	6841078	0.0134484	-1.41
Itga5	NM_010577	integrin alpha 5 (fibronectin receptor alpha)	1423267_s_at	16402	0.0029	-2.22767	6838809	0.0179724	-1.21
Itga8	NM_001001309	integrin alpha 8	1427489_at	241226	0	-7.77605	6884750	0.00427005	-1.91
Itga9	NM_133721	integrin alpha 9	1450029_s_at	104099	0.0002	2.4517	6992855	9.53811e-05	1.61
Itgb3	NM_016780	integrin beta 3	1455257_at	16416	0	-3.00752	6784527	0.0324089	-1.31
Itih2	NM_010582	inter-alpha trypsin inhibitor heavy chain 2	1417618_at	16425	0	17.228	6884646	0.000238777	2.91
Itih4	NM_018746	inter alpha-trypsin inhibitor heavy chain 4	1431808_a_at	16427	0.0017	-2.04415	6817955	7.82889e-05	-1.51
Itpr2	NM_019923	inositol 1 4 5-triphosphate receptor 2	1424834_s_at	16439	0.0002	-2.76472	6958269	0.0201338	-1.31
Junb	NM_008416	Jun-B oncogene	1415899_at	16477	0.0003	2.2492	6983894	6.99599e-05	2.11
Kcnc3	NM_008422	potassium voltage gated channel Shaw-related subfamily member 3	1440861_a_at	16504	0.0001	2.1047	6960291	0.00563563	1.31
Kcnh1	NM_010600	potassium voltage-gated channel subfamily H (eag-related) member 1	1435994_at	16510	0.0022	-2.57334	6756419	0.00129527	-1.21
Kcnk1	NM_008430	potassium channel subfamily K member 1	1448690_at	16525	0.0001	4.1038	6979914	0.000216308	2.11
Kcnk2	NM_010607	potassium channel subfamily K member 2	1449158_at	16526	0	4.3405	6765129	1.4251e-05	2.21
Kcnmb2	NM_028231	potassium large conductance calcium-activated channel subfamily M beta member 2	1431844_at	72413	0.0002	2.4649	6896557	0.0020317	1.61
Kcnq5	NM_023872	potassium voltage-gated channel subfamily Q member 5	1457587_at	226922	0	-3.11236	6757329	0.00824437	-1.41
Kctd1	NM_134112	potassium channel tetramerisation domain containing 1	1425104_at	106931	0	2.5022	6863582	0.0414699	1.41
Kdelr3	NM_134090	KDEL (Lys-Asp-Glu-Leu) endoplasmic reticulum protein retention receptor 3	1418538_at	105785	0.0001	2.3068	6831919	0.00131309	1.61
Kif11	NM_010615	kinesin family member 11	1435306_a_at	16551	0.0005	2.6941	6869503	0.000124102	1.81
Kif20a	NM_009004	kinesin family member 20A	1449207_a_at	19348	0.0035	3.087	6859953	0.000318087	1.61
Kif23	NM_024245	kinesin family member 23	1455990_at	71819	0	3.5976	6996186	8.07294e-05	2.01
Kif26a	XM_138275	kinesin family member 26A	1447933_at	668303	0.0001	-5.19481	6798253	0.00186063	-1.21
Kit	NM_021099	kit oncogene	1452514_a_at	16590	0.0042	-2.002	6931759	0.0261392	-1.61
Kitl	NM_013598	kit ligand	1415854_at	17311	0.0096	-3.01296	6770201	0.0280737	-1.71
Klf12	NM_010636	Kruppel-like factor 12	1455521_at	16597	0.0001	-4.34216	6826975	0.00928844	-1.31
Klf2	NM_008452	Kruppel-like factor 2 (lung)	1448890_at	16598	0.0024	-3.14564	6977151	0.0161255	-1.41
Klf4	NM_010637	Kruppel-like factor 4 (gut)	1417395_at	16600	0.0066	-3.47222	6921873	5.29763e-05	-1.51
Klf5	NM_009769	Kruppel-like factor 5	1451021_a_at	12224	0	2.5529	6821304	0.000137096	1.71
Klhdc8a	NM_144810	kelch domain containing 8A	1424885_at	213417	0	4.3496	6753108	4.28031e-05	2.01
Klhl5	NM_175174	kelch-like 5 (Drosophila)	1426530_a_at	71778	0	-2.40906	6931229	0.00330031	-1.41
Krt18	NM_010664	keratin 18	1448169_at	16668	0	4.4938	6833382	3.83427e-05	3.01
Krt19	NM_008471	keratin 19	1417156_at	16669	0	2.5898	6791406	0.00353387	1.91
Krt23	NM_033373	keratin 23	1418213_at	94179	0	3.1056	6791338	3.81155e-06	2.21
Krt8	NM_031170	keratin 8	1420647_a_at	16691	0	2.6051	6838693	5.93405e-05	2.81
Krt80	NM_028770	keratin 80	1419619_at	74127	0.0001	-2.50941	6838621	0.000140626	-1.71
Lad1	NM_133664	ladinin	1418449_at	16763	0	7.23	6753400	9.33635e-05	2.41
Lama2	NM_008481	laminin alpha 2	1426285_at	16773	0.0003	-2.07987	6772906	0.0198785	-1.21
Lama4	NM_010681	laminin alpha 4	1424807_at	16775	0.0015	-2.26244	6767231	0.0184203	-1.31
Lef1	NM_010703	lymphoid enhancer binding factor 1	1454734_at	16842	0.0001	-2.0145	6901380	0.00780573	-1.41
Lepr	NM_010704	leptin receptor	1456156_at	16847	0.0002	-2.60756	6915847	0.016117	-1.51
Lgi2	NM_144945	leucine-rich repeat LGI family member 2	1440147_at	246316	0.0044	-2.22519	6938171	0.0138771	-1.31
Lims2	NM_144862	LIM and senescent cell antigen like domains 2	1424408_at	225341	0.001	-4.86381	6859790	0.00107829	-1.51
Lipg	NM_010720	lipase endothelial	1450188_s_at	16891	0	-5.50661	6866693	0.00465552	-1.61
Liph	NM_153404	lipase member H	1456619_at	239759	0.0002	2.3851	6844544	9.04833e-06	2.01
LOC623121	XM_994228	similar to Interferon-activatable protein 203 (Ifi-203) (Interferon-inducible protein p203)	1437636_at	623121	0	-4.04858	6764233	0.0057859	-1.61
Lphn3	NM_198702	latrophilin 3	1447551_x_at	319387	0.001	-3.82555	6931961	0.0264573	-1.51
Lpp	NM_178665	LIM domain containing preferred translocation partner in lipoma	1454899_at	210126	0	2.0632	6840175	0.000186903	1.31
Lrat	NM_023624	lecithin-retinol acyltransferase (phosphatidylcholine-retinol-O-acyltransferase)	1444487_at	79235	0.0017	-6.56168	6906381	0.000252227	-1.41
Lrfn4	NM_153388	leucine rich repeat and fibronectin type III domain containing 4	1454700_at	225875	0	3.26	6871019	0.0010358	1.81
Lrp1	NM_008512	low density lipoprotein receptor-related protein 1	1448655_at	16971	0.0002	-2.21828	6777957	0.00666443	-1.41
Lrrc8c	NM_133897	leucine rich repeat containing 8 family member C	1455398_at	100604	0	2.0509	6933138	0.00028392	1.31
Ltb4dh	NM_025968	leukotriene B4 12-hydroxydehydrogenase	1417777_at	67103	0	5.7064	6922026	2.01321e-05	3.91
Ltbp1	NM_019919	latent transforming growth factor beta binding protein 1	1448870_at	268977	0	-3.40368	6852229	0.00161324	-1.41
Ltbp4	NM_175641	latent transforming growth factor beta binding protein 4	1436665_a_at	108075	0	-2.51319	6966039	0.0438755	-1.41
Lyl1	NM_008535	lymphoblastomic leukemia	1419120_at	17095	0.0001	-2.80505	6977758	0.0172748	-1.21
Lysmd2	NM_027309	LysM putative peptidoglycan-binding domain containing 2	1428626_at	70082	0.0001	-2.80584	6990564	0.0239487	-1.31
Macf1	AK143540	microtubule-actin crosslinking factor 1	1428847_a_at	11426	0	-2.53357	6925165	0.0301477	-1.61
Mal	NM_010762	myelin and lymphocyte protein T-cell differentiation protein	1432558_a_at	17153	0.0007	3.4975	6890710	8.18898e-05	2.51
Mall	NM_145532	mal T-cell differentiation protein-like	1435693_at	228576	0.0007	2.4487	6890712	9.78646e-05	1.71
Malt1	NM_172833	mucosa associated lymphoid tissue lymphoma translocation gene 1	1456429_at	240354	0.0002	3.2933	6861627	0.000248712	1.81
Mamdc2	NM_174857	MAM domain containing 2	1453152_at	71738	0.0003	-3.83289	6872204	0.0270123	-1.51
Mapk11	NM_011161	mitogen-activated protein kinase 11	1421926_at	19094	0	3.0935	6837785	0.00217274	1.71
Mapk13	NM_011950	mitogen activated protein kinase 13	1448871_at	26415	0.0001	3.3931	6849571	0.000355262	2.01
Mapt	NM_010838	microtubule-associated protein tau	1455028_at	17762	0.0001	-4.79157	6784498	0.00606701	-1.71
Marcks	NM_008538	myristoylated alanine rich protein kinase C substrate	1456700_x_at	17118	0	-2.22816	6773286	0.00293499	-1.61
Mark1	NM_145515	MAP/microtubule affinity-regulating kinase 1	1425510_at	226778	0.0003	2.2938	6764841	0.00952846	1.31
Marveld3	NM_028584	MARVEL (membrane-associating) domain containing 3	1451764_at	73608	0.0001	2.5436	6985288	0.000106609	2.11
Mat1a	NM_133653	methionine adenosyltransferase I alpha	1423147_at	11720	0.0006	2.9109	6818498	4.98064e-05	1.71
Mbl1	NM_010775	mannose binding lectin (A)	1419578_at	17194	0.0001	2.6811	6818500	0.0159062	1.41
Mboat1	NM_153546	membrane bound O-acyltransferase domain containing 1	1435323_a_at	218121	0	6.3332	6805794	0.000267781	2.61
Mcam	NM_023061	melanoma cell adhesion molecule	1416357_a_at	84004	0	-2.12585	6988609	0.0171653	-1.41
Med12l	AK129412	mediator of RNA polymerase II transcription subunit 12 homolog (yeast)-like	1452864_at	329650	0	2.7164	6897819	0.000708912	1.51
Melk	NM_010790	maternal embryonic leucine zipper kinase	1416558_at	17279	0.0035	2.5169	6913080	0.0212695	1.51
Mertk	NM_008587	c-mer proto-oncogene tyrosine kinase	1422869_at	17289	0.0004	-2.90613	6881087	0.0125299	-1.41
Metrnl	NM_144797	meteorin glial cell differentiation regulator-like	1424356_a_at	210029	0	2.2856	6785558	3.68241e-05	1.31
Mfap2	NM_008546	microfibrillar-associated protein 2	1417359_at	17150	0	-2.13493	6918131	0.000130226	-1.61
Mfap4	NM_029568	microfibrillar-associated protein 4	1424010_at	76293	0.0001	-4.09668	6781515	0.0233773	-1.81
Mfhas1	XM_988067	malignant fibrous histiocytoma amplified sequence 1	1429005_at	52065	0	-2.55754	6975392	0.0149949	-1.41
Mgll	NM_011844	monoglyceride lipase	1450391_a_at	23945	0	-3.70096	6947814	0.00808661	-1.31
Mgst2	AK133292	microsomal glutathione S-transferase 2	1452592_at	211666	0	3.3519	6897387	0.0186728	1.41
Mlph	NM_053015	melanophilin	1449896_at	171531	0	3.4223	6751520	0.000455638	2.01
Mpdz	NM_010820	multiple PDZ domain protein	1418664_at	17475	0.0001	-2.86123	6922808	0.000142459	-1.31
Mpp6	NM_019939	membrane protein palmitoylated 6 (MAGUK p55 subfamily member 6)	1449348_at	56524	0.0001	2.2324	6946138	0.0247828	1.41
Mras	NM_008624	muscle and microspikes RAS	1453419_at	17532	0.0005	-2.35018	6998214	0.0204115	-1.41
Mrc1	NM_008625	mannose receptor C type 1	1450430_at	17533	0.0005	-2.08943	6875181	0.0173118	-1.21
Mrc2	NM_008626	mannose receptor C type 2	1421045_at	17534	0	-2.32829	6784564	0.0139869	-1.21
Mrpl32	NM_029271	mitochondrial ribosomal protein L32	1424372_at	75398	0	2.6352	6811140	0.0136888	1.51
Ms4a4d	NM_025658	membrane-spanning 4-domains subfamily A member 4D	1418990_at	66607	0	-3.53357	6868110	0.000269287	-1.51
Msln	NM_018857	mesothelin	1460238_at	56047	0.0005	-4.62321	6854431	0.000917958	-1.61
Mt1	NM_013602	metallothionein 1	1422557_s_at	17748	0	3.4782	6978291	0.0174097	2.21
Mt2	NM_008630	metallothionein 2	1428942_at	17750	0	4.2889	6978290	0.00303244	1.91
Mta3	NM_054082	metastasis associated 3	1451352_s_at	116871	0.0015	2.6254	6852695	0.0191747	1.11
Mtap4	NM_008633	microtubule-associated protein 4	1416091_at	17758	0.0002	-2.07727	6992415	0.0108362	-1.21
Mtap6	NM_001048167	microtubule-associated protein 6	1422550_a_at	17760	0.0002	-2.18245	6962873	0.00601593	-1.31
Muc4	NM_080457	mucin 4	1438555_x_at	140474	0.0005	2.4348	6840589	0.0014148	1.61
Mus81	NM_027877	MUS81 endonuclease homolog (yeast)	1431885_a_at	71711	0.0004	2.1139	6871119	0.000347467	1.31
Mustn1	AJ277212	musculoskeletal embryonic nuclear protein 1	1427201_at	66175	0.0001	-2.93858	6817954	0.015375	-1.11
Mxra7	NM_026280	matrix-remodelling associated 7	1430539_at	67622	0.0003	-2.30521	6792550	0.00273606	-1.21
Mxra8	NM_024263	matrix-remodelling associated 8	1452330_a_at	74761	0	-2.50125	6919190	0.0323875	-1.41
Myc	NM_010849	myelocytomatosis oncogene	1424942_a_at	17869	0	2.6607	6830927	0.0172395	1.91
Myh10	NM_175260	myosin heavy polypeptide 10 non-muscle	1452740_at	77579	0	-3.09885	6781941	0.00483669	-1.71
Myrip	NM_144557	myosin VIIA and Rab interacting protein	1460601_at	245049	0.0002	-4.14422	6992942	0.00182592	-1.51
Nab2	NM_008668	Ngfi-A binding protein 2	1417930_at	17937	0.0003	2.9275	6777960	0.000336762	1.81
Nat6	NM_019750	N-acetyltransferase 6	1449954_at	15586	0.0092	-2.90613	6992225	0.00348424	-1.21
Ndufa4l2	XM_978975	NADH dehydrogenase (ubiquinone) 1 alpha subcomplex 4-like 2	1434905_at	407790	0	-3.11721	6771570	0.0134038	-1.21
Nek6	NM_021606	NIMA (never in mitosis gene a)-related expressed kinase 6	1423596_at	59126	0	2.6933	6876543	0.000239879	1.61
Nfatc4	NM_023699	nuclear factor of activated T-cells cytoplasmic calcineurin-dependent 4	1423380_s_at	73181	0.0002	-2.06612	6819284	0.00123285	-1.31
Nid1	NM_010917	nidogen 1	1416808_at	18073	0.0004	-2.00723	6804893	0.0047508	-1.31
Nin	NM_001081453	ninein	1428600_at	18080	0.0004	-2.10659	6801500	0.000897946	-1.31
Nnmt	NM_010924	nicotinamide N-methyltransferase	1432517_a_at	18113	0.0003	-2.04876	6995402	0.0369539	-1.11
Nola2	NM_026631	nucleolar protein family A member 2	1416606_s_at	52530	0	2.1544	6780863	0.0048363	1.71
Nostrin	NM_181547	nitric oxide synthase trafficker	1441075_at	329416	0.0001	-3.35345	6877901	0.0115162	-1.91
Notch4	NM_010929	Notch gene homolog 4 (Drosophila)	1449146_at	18132	0.0001	-3.25733	6850025	0.0051893	-1.61
Nova2	NM_001029877	neuro-oncological ventral antigen 2	1439192_at	384569	0.0017	-2.55558	6958975	0.00057801	-1.51
Noxo1	NM_027988	NADPH oxidase organizer 1	1425151_a_at	71893	0.001	2.6419	6849312	0.0124159	1.31
Npal1	NM_001081205	NIPA-like domain containing 1	1456321_at	70701	0.0007	2.9832	6928007	3.31545e-05	2.01
Npr2	NM_173788	natriuretic peptide receptor 2	1427191_at	230103	0.0001	-2.02799	6913020	0.0307247	-1.41
Npr3	NM_001039181	natriuretic peptide receptor 3	1435184_at	18162	0.0004	-4.14766	6834024	0.011172	-1.81
Nr2f1	NM_010151	nuclear receptor subfamily 2 group F member 1	1418157_at	13865	0.0011	-3.00481	6814557	0.0260738	-1.41
Nr2f2	NM_009697	nuclear receptor subfamily 2 group F member 2	1436475_at	11819	0.0036	-2.28833	6968200	0.0206516	-1.31
Nrn1	NM_153529	neuritin 1	1428393_at	68404	0	-2.21288	6812375	0.0156852	-1.21
Nrp2	NM_010939	neuropilin 2	1426528_at	18187	0.0028	-2.17439	6749911	0.0217778	-1.11
Nsg1	NM_010942	neuron specific gene family member 1	1423055_at	18196	0	-3.69276	6937585	0.000500998	-1.61
Nt5dc2	NM_027289	5'-nucleotidase domain containing 2	1424882_a_at	70021	0.0002	-3.60231	6817970	0.0114849	-1.41
Ntn1	NM_008744	netrin 1	1454974_at	18208	0	-2.85796	6789197	0.00892963	-1.31
Nuak1	NM_001004363	NUAK family SNF1-like kinase 1	1438684_at	77976	0.0008	-2.51953	6775625	0.0310395	-1.31
Nudt4	NM_027722	nudix (nucleoside diphosphate linked moiety X)-type motif 4	1449107_at	71207	0	2.3669	6776198	0.00147954	1.51
Nxn	NM_008750	nucleoredoxin	1422465_a_at	18230	0	-2.32504	6789813	0.000310786	-1.31
Ociad2	NM_026950	OCIA domain containing 2	1453187_at	433904	0	2.1611	6939130	0.00105239	1.81
Ogn	NM_008760	osteoglycin	1419662_at	18295	0.0028	-6.73401	6806960	0.0088496	-1.81
Oit1	NM_146050	oncoprotein induced transcript 1	1424502_at	18300	0.0038	7.7073	6822478	0.0366122	1.21
Olfml1	NM_172907	olfactomedin-like 1	1434632_at	244198	0	-2.68745	6963267	0.0112626	-1.61
Olfml2b	NM_177068	olfactomedin-like 2B	1423915_at	320078	0	3.6209	6755125	0.00267713	1.71
Olfml3	NM_133859	olfactomedin-like 3	1448475_at	99543	0	-2.36183	6907784	0.0141236	-1.41
Ovgp1	NM_007696	oviductal glycoprotein 1	1426526_s_at	12659	0	3.7317	6900237	0.000151005	1.41
Pafah1b3	NM_008776	platelet-activating factor acetylhydrolase isoform 1b alpha1 subunit	1416410_at	18476	0	2.6718	6965940	6.16121e-06	1.71
Palld	NM_001081390	palladin cytoskeletal associated protein	1433768_at	72333	0	-3.32336	6982828	0.000155334	-1.71
Palm	NM_023128	paralemmin	1423967_at	18483	0.0045	-2.15193	6769147	0.00724206	-1.91
Papss2	NM_011864	3'-phosphoadenosine 5'-phosphosulfate synthase 2	1434510_at	23972	0.0021	-3.36927	6869216	0.000296264	-1.81
Paqr8	NM_028829	progestin and adipoQ receptor family member VIII	1435246_at	74229	0	2.8137	6747986	0.000153264	1.71
Parvb	NM_133167	parvin beta	1438672_at	170736	0.0001	-4.1684	6832300	0.00104587	-1.61
Pcbd1	NM_025273	pterin 4 alpha carbinolamine dehydratase/dimerization cofactor of hepatocyte nuclear factor 1 alpha (TCF1) 1	1418713_at	13180	0	4.055	6768198	0.000426084	1.91
Pcbp3	NM_021568	poly(rC) binding protein 3	1437722_x_at	59093	0.0015	-2.75938	6775192	0.00276165	-1.31
Pcdh1	NM_029357	protocadherin 1	1452294_at	75599	0	-3.12793	6864776	0.0262793	-1.21
Pcsk6	XM_919486	proprotein convertase subtilisin/kexin type 6	1426981_at	18553	0	6.4154	6961192	4.16441e-05	2.41
Pde7b	NM_013875	phosphodiesterase 7B	1445539_at	29863	0.0001	2.123	6772550	9.45131e-07	1.61
Pde9a	NM_008804	phosphodiesterase 9A	1449403_at	18585	0.0002	-3.41763	6849779	0.00228602	-1.41
Pdgfra	NM_011058	platelet derived growth factor receptor alpha polypeptide	1438946_at	18595	0.0001	-4.36681	6931740	0.000275385	-1.71
Pdgfrl	NM_026840	platelet-derived growth factor receptor-like	1428896_at	68797	0.0002	2.7512	6975661	0.0150445	1.31
Pecam1	NM_001032378	platelet/endothelial cell adhesion molecule 1	1421287_a_at	18613	0.0002	-3.80952	6791960	0.00344039	-1.71
Peg3	NM_008817	paternally expressed 3	1433924_at	18616	0.0004	-2.85714	6972750	0.00581522	-1.51
Pfkfb3	NM_133232	6-phosphofructo-2-kinase/fructose-2 6-biphosphatase 3	1416432_at	170768	0.002	-2.76625	6884709	0.00455266	-1.41
Pglyrp1	NM_009402	peptidoglycan recognition protein 1	1449184_at	21946	0	4.4041	6958974	0.0428958	1.61
Pgr	NM_008829	progesterone receptor	1439527_at	18667	0	-5.19481	6986781	0.026833	-1.51
Phactr1	NM_001005740	phosphatase and actin regulator 1	1454832_at	218194	0.0001	-2.918	6806581	0.00681267	-1.71
Pik3cd	NM_001029837	phosphatidylinositol 3-kinase catalytic delta polypeptide	1453281_at	18707	0.0014	-2.06143	6926974	0.0329268	-1.11
Pip5k1b	NM_008846	phosphatidylinositol-4-phosphate 5-kinase type 1 beta	1450389_s_at	18719	0.0001	2.3233	6872262	0.000416678	1.61
Pkhd1	NM_153179	polycystic kidney and hepatic disease 1	1419820_at	241035	0.0023	23.7263	6757270	1.09819e-06	1.61
Pkia	NM_008862	protein kinase inhibitor alpha	1420859_at	18767	0.0001	-2.29991	6895532	0.00812218	-1.21
Pkib	NM_001039053	protein kinase inhibitor beta cAMP dependent testis specific	1421137_a_at	18768	0.0013	2.4268	6768071	0.00212397	1.51
Pkig	NM_001039390	protein kinase inhibitor gamma	1423945_a_at	18769	0.0002	-2.01491	6883034	0.000483478	-1.31
Pkn3	NM_153805	protein kinase N3	1434525_at	263803	0.0005	-2.17202	6876037	0.0449557	-1.21
Pknox2	NM_001029838	Pbx/knotted 1 homeobox 2	1433907_at	208076	0.0001	-3.13775	6994672	0.00213627	-1.31
Pla2g1b	NM_011107	phospholipase A2 group IB pancreas	1437015_x_at	18778	0	3.0401	6933672	0.00592174	1.71
Pla2g4b	NM_145378	phospholipase A2 group IVB (cytosolic)	1425045_at	211429	0.0005	2.6101	6880556	0.00478155	1.31
Pla2g4f	NM_001024145	phospholipase A2 group IVF	1455408_at	271844	0.0001	2.2918	6890295	3.21666e-05	1.61
Pla2g7	NM_013737	phospholipase A2 group VII (platelet-activating factor acetylhydrolase plasma)	1430700_a_at	27226	0	3.4833	6850534	0.000961852	1.91
Pla2r1	NM_008867	phospholipase A2 receptor 1	1450144_at	18779	0	-2.70636	6887082	0.0230412	-1.31
Plcb4	NM_013829	phospholipase C beta 4	1435771_at	18798	0.0004	-2.72109	6881455	0.0108474	-1.41
Plcd1	NM_019676	phospholipase C delta 1	1416675_s_at	18799	0.0004	-2.72405	6999404	0.0288363	-1.11
Plcd3	NM_152813	phospholipase C delta 3	1431892_a_at	72469	0.0001	3.0993	6791666	0.0306081	1.31
Plce1	NM_019588	phospholipase C epsilon 1	1452398_at	74055	0.0003	-2.53421	6869570	0.0109553	-1.41
Plch1	NM_183191	phospholipase C eta 1	1457157_at	269437	0.0021	3.0957	6905570	0.000755144	1.91
Plch2	NM_175556	phospholipase C eta 2	1436335_at	269615	0.0001	2.4209	6927238	0.0460303	1.01
Plcl1	BC046582	phospholipase C-like 1	1445723_at	227120	0.0006	-3.85802	6749582	0.0454448	-1.21
Pld1	NM_008875	phospholipase D1	1437112_at	18805	0	2.4929	6896406	7.59702e-06	1.71
Plekho1	NM_023320	pleckstrin homology domain containing family O member 1	1417128_at	67220	0	-2.02675	6907226	0.0238382	-1.11
Plk1	AK148076	polo-like kinase 1 (Drosophila)	1448191_at	18817	0.0001	2.3319	6964033	0.000584636	1.31
Plod2	NM_011961	procollagen lysine 2-oxoglutarate 5-dioxygenase 2	1416686_at	26432	0.0001	-4.28816	6991383	0.00754189	-1.61
Plscr2	NM_008880	phospholipid scramblase 2	1448961_at	18828	0.0002	-3.97141	6991362	0.0448894	-1.31
Pltp	NM_011125	phospholipid transfer protein	1417963_at	18830	0	-3.5461	6892964	0.0416528	-1.51
Plvap	NM_032398	plasmalemma vesicle associated protein	1418090_at	84094	0.0001	-2.78009	6983262	0.00529839	-1.51
Plxdc2	NM_026162	plexin domain containing 2	1449270_at	67448	0.0262	-3.52983	6875214	0.00942967	-1.41
Plxnb1	NM_172775	plexin B1	1435254_at	235611	0	3.0862	6992387	5.63059e-07	2.01
Pnkd	NM_001039509	paroxysmal nonkinesiogenic dyskinesia	1418746_at	56695	0	-2.59538	6750532	0.00332037	-1.21
Podxl	NM_013723	podocalyxin-like	1448688_at	27205	0	-2.9129	6952500	0.0136145	-1.41
Popdc2	NM_001081984	popeye domain containing 2	1417806_at	64082	0	-3.03398	6840841	0.0182856	-1.41
Popdc3	NM_024286	popeye domain containing 3	1423856_at	78977	0.0004	-4.2337	6767613	0.027366	-1.41
Pp11r	NM_008902	placental protein 11 related	1449937_at	19011	0.0001	-2.48016	6838331	0.000854566	-1.21
Ppa1	NM_026438	pyrophosphatase (inorganic) 1	1416939_at	67895	0	2.0181	6768232	0.0353846	1.51
Ppap2a	NM_008903	phosphatidic acid phosphatase 2a	1422619_at	19012	0.0002	-4.1425	6810299	0.0396064	-1.61
Ppap2c	NM_015817	phosphatidic acid phosphatase type 2c	1451210_at	50784	0	2.9809	6775298	3.98221e-05	2.91
Ppbp	NM_023785	pro-platelet basic protein	1418480_at	57349	0.0005	-6.05694	6932367	0.0234113	-1.61
Ppm1f	NM_176833	protein phosphatase 1F (PP2C domain containing)	1454934_at	68606	0.0009	-2.12404	6839703	0.00215007	-1.41
Ppp1r14a	NM_026731	protein phosphatase 1 regulatory (inhibitor) subunit 14A	1418086_at	68458	0	-4.51671	6959487	0.0149667	-1.31
Ppp1r16b	NM_153089	protein phosphatase 1 regulatory (inhibitor) subunit 16B	1455080_at	228852	0.0001	-2.79955	6882768	0.0158824	-1.81
Ppp1r9a	NM_181595	protein phosphatase 1 regulatory (inhibitor) subunit 9A	1432037_at	243725	0.0004	3.9575	6943862	6.83101e-05	1.51
Prc1	NM_145150	protein regulator of cytokinesis 1	1423775_s_at	233406	0	2.6518	6961987	0.00116554	1.91
Prdm6	NM_001033281	PR domain containing 6	1436962_at	225518	0	-2.62605	6860936	0.00481062	-1.61
Prelp	NM_054077	proline arginine-rich end leucine-rich repeat	1416322_at	116847	0	-2.76167	6762328	0.000161202	-1.91
Prkar1b	NM_008923	protein kinase cAMP dependent regulatory type I beta	1440132_s_at	19085	0.003	-2.26347	6942655	0.0014107	-1.31
Prkar2b	NM_011158	protein kinase cAMP dependent regulatory type II beta	1430640_a_at	19088	0.011	-2.18436	6799879	0.0406988	-1.21
Prkce	NM_011104	protein kinase C epsilon	1452878_at	18754	0	-2.71961	6852820	0.00728249	-1.41
Prkcm	NM_008858	protein kinase C mu	1447623_s_at	18760	0.0002	-2.63992	6800675	0.0108932	-1.21
Prkcq	NM_008859	protein kinase C theta	1426044_a_at	18761	0.0007	-3.63769	6874979	0.04598	-1.31
Prkd2	NM_178900	protein kinase D2	1434333_a_at	101540	0.0001	-2.20507	6958914	0.00948671	-1.21
Prkg1	AK052877	protein kinase cGMP-dependent type I	1444232_at	19091	0	-2.86205	6872617	0.0355667	-1.31
Prkg2	NM_008926	protein kinase cGMP-dependent type II	1435162_at	19092	0	-6.50618	6940300	0.0118256	-1.71
Prss8	NM_133351	protease serine 8 (prostasin)	1418320_at	76560	0	2.0451	6971412	4.16914e-05	2.21
Prx	NM_019412	periaxin	1423292_a_at	19153	0.0003	-3.29489	6959306	0.0170374	-1.81
Psat1	NM_177420	phosphoserine aminotransferase 1	1454607_s_at	107272	0.0006	3.8479	6874304	0.000154899	2.41
Pscd3	NM_011182	pleckstrin homology Sec7 and coiled-coil domains 3	1418758_a_at	19159	0	-2.8177	6935408	0.00375534	-1.51
Psrc1	NM_019976	proline/serine-rich coiled-coil 1	1425416_s_at	56742	0.0001	5.4044	6900388	2.39103e-05	2.71
Ptgis	NM_008968	prostaglandin I2 (prostacyclin) synthase	1448816_at	19223	0.0001	-3.15856	6893139	0.000336932	-1.41
Pthlh	NM_008970	parathyroid hormone-like peptide	1422324_a_at	19227	0	12.4842	6958326	0.0266351	1.71
Ptprb	NM_029928	protein tyrosine phosphatase receptor type B	1427486_at	19263	0.0074	-3.57782	6770908	0.0339388	-1.91
Ptprd	NM_011211	protein tyrosine phosphatase receptor type D	1424886_at	19266	0.0013	-3.35008	6930077	0.0449236	-1.51
Ptpre	NM_011212	protein tyrosine phosphatase receptor type E	1418540_a_at	19267	0	-2.14087	6964798	0.0464096	-1.31
Ptprg	NM_008981	protein tyrosine phosphatase receptor type G	1429691_at	19270	0.0037	-2.04332	6816951	0.0389947	-1.21
Ptprn	NM_008985	protein tyrosine phosphatase receptor type N	1416588_at	19275	0	7.4384	6759789	0.000162765	4.11
Pvrl2	NM_008990	poliovirus receptor-related 2	1424456_at	19294	0.0001	2.0693	6973161	5.04971e-06	1.91
Pygm	NM_011224	muscle glycogen phosphorylase	1448602_at	19309	0.0024	-2.87522	6867859	0.0150901	-1.51
Rab15	NM_134050	RAB15 member RAS oncogene family	1417829_a_at	104886	0	3.4774	6801917	5.69653e-05	2.71
Rab25	NM_016899	RAB25 member RAS oncogene family	1417738_at	53868	0	3.5212	6906762	3.31181e-05	2.31
Rab38	NM_028238	Rab38 member of RAS oncogene family	1439628_x_at	72433	0	2.664	6962379	0.000820797	1.71
Rab3c	NM_023852	RAB3C member RAS oncogene family	1449494_at	67295	0	4.1287	6816018	0.00571784	1.71
Rai14	NM_030690	retinoic acid induced 14	1417401_at	75646	0.0041	2.6419	6833980	3.31112e-07	1.81
Ramp2	NM_019444	receptor (calcitonin) activity modifying protein 2	1418187_at	54409	0.0001	-2.88934	6784251	2.84151e-05	-2.21
Rap1gap	NM_001081155	Rap1 GTPase-activating protein	1428443_a_at	110351	0.0002	3.9335	6917963	0.000511987	1.91
Rapgef3	NM_144850	Rap guanine nucleotide exchange factor (GEF) 3	1424470_a_at	223864	0.0001	-2.68962	6838332	0.0168836	-1.31
Rapgef4	NM_019688	Rap guanine nucleotide exchange factor (GEF) 4	1425518_at	56508	0.0009	-2.58933	6878038	0.0207536	-1.41
Rarres2	NM_027852	retinoic acid receptor responder (tazarotene induced) 2	1437902_s_at	71660	0	-2.79174	6953395	0.0102425	-1.81
Rasal2	NM_177644	RAS protein activator like 2	1436910_at	226525	0.002	-3.71471	6763316	0.033143	-1.31
Rasgef1b	NM_181318	RasGEF domain family member 1B	1454742_at	320292	0	2.3442	6940303	5.5826e-05	1.81
Rasgrf1	NM_011245	RAS protein-specific guanine nucleotide-releasing factor 1	1422600_at	19417	0.0001	7.1227	6991261	0.000249102	2.21
Rasgrp2	NM_011242	RAS guanyl releasing protein 2	1417804_at	19395	0	-4.36872	6867860	0.00340356	-1.41
Rasip1	NM_028544	Ras interacting protein 1	1428016_a_at	69903	0.0031	-2.82167	6960388	0.00768765	-1.61
Rassf6	NM_028478	Ras association (RalGDS/AF-6) domain family 6	1429262_at	73246	0	2.1767	6939888	0.0111073	1.31
Rbm35a	NM_194055	RNA binding motif protein 35A	1454681_at	207920	0	2.9717	6919693	9.68882e-06	2.11
Rbm35b	NM_176838	RNA binding motif protein 35b	1433683_at	77411	0	2.6448	6985021	2.56124e-05	1.91
Rbp4	NM_011255	retinol binding protein 4 plasma	1426225_at	19662	0	3.7029	6872980	0.00281389	1.91
Rcn1	NM_009037	reticulocalbin 1	1417090_at	19672	0	-2.28206	6889413	0.0229788	-1.31
Reck	NM_016678	reversion-inducing-cysteine-rich protein with kazal motifs	1450784_at	53614	0.0001	-3.21854	6913039	0.00708819	-1.51
Reep6	NM_139292	receptor accessory protein 6	1430128_a_at	70335	0	3.1119	6769212	0.0132479	2.01
Rfk	NM_019437	riboflavin kinase	1416230_at	54391	0.0012	2.5838	6868404	0.00941881	1.61
Rftn2	NM_028713	raftlin family member 2	1428895_at	74013	0.001	-2.56279	6758754	0.0230511	-1.21
Rgl1	NM_016846	ral guanine nucleotide dissociation stimulator -like 1	1418535_at	19731	0.0003	-2.64201	6763090	0.0291601	-1.21
Rgs12	AK053804	regulator of G-protein signaling 12	1453129_a_at	71729	0	-3.5014	6929861	0.0346637	-1.31
Rgs16	NM_011267	regulator of G-protein signaling 16	1455265_a_at	19734	0.0005	10.4917	6754138	0.000108061	2.61
Rgs9	NM_011268	regulator of G-protein signaling 9	1418691_at	19739	0.0001	-2.49813	6792079	0.00304528	-1.51
Rhbdl2	AK162292	rhomboid veinlet-like 2 (Drosophila)	1445233_at	230726	0.0002	5.8829	6916991	8.49487e-05	2.51
Rhod	NM_007485	ras homolog gene family member D	1419061_at	11854	0.0016	2.5045	6871002	0.00855038	1.41
Rhoj	NM_023275	ras homolog gene family member J	1418892_at	80837	0.0008	-2.90698	6796121	0.00131462	-1.31
Rian	AB063319	RNA imprinted and accumulated in nucleus	1427580_a_at	75745	0.0006	7.8421	6797993	0.000285655	5.01
Rin1	NM_145495	Ras and Rab interactor 1	1424507_at	225870	0.0001	2.7633	6867715	1.92955e-05	1.61
Ripk4	NM_023663	receptor-interacting serine-threonine kinase 4	1418487_at	72388	0.0004	2.6488	6848209	2.17382e-06	1.81
Rnd1	NM_172612	Rho family GTPase 1	1455197_at	223881	0.0005	-3.27654	6838392	0.0356851	-1.01
Rnf128	NM_023270	ring finger protein 128	1418318_at	66889	0.0004	5.0676	7014110	0.000114018	2.21
Robo1	NM_019413	roundabout homolog 1 (Drosophila)	1427231_at	19876	0	-3.3456	6842326	0.00466781	-1.31
Robo4	NM_028783	roundabout homolog 4 (Drosophila)	1426206_at	74144	0.0001	-2.2805	6988213	0.000198861	-1.61
Ros1	NM_011282	Ros1 proto-oncogene	1425970_a_at	19886	0.0002	5.8554	6773933	1.45635e-06	3.31
Rtkn	NM_133641	rhotekin	1425601_a_at	20166	0.0001	2.7765	6947396	0.00010841	1.31
Rtn2	NM_013648	reticulon 2 (Z-band associated protein)	1419056_at	20167	0.0002	-2.83768	6959000	0.00358017	-1.21
Rusc2	NM_199057	RUN and SH3 domain containing 2	1426791_at	100213	0.0016	-2.81294	6913002	0.015837	-1.31
S100a14	NM_025393	S100 calcium binding protein A14	1449166_at	66166	0	7.6727	6899360	0.000317756	2.61
S100a8	NM_013650	S100 calcium binding protein A8 (calgranulin A)	1419394_s_at	20201	0.0001	-3.97298	6899378	0.0351488	-1.61
S100a9	NM_009114	S100 calcium binding protein A9 (calgranulin B)	1448756_at	20202	0.0002	-4.28816	6906912	0.018654	-2.11
Samd10	NM_172676	sterile alpha motif domain containing 10	1435756_at	229011	0.0009	2.2621	6894304	0.000196615	1.51
Samd4	NM_001037221	sterile alpha motif domain containing 4	1436356_at	74480	0.0066	-2.13904	6818667	0.0327181	-1.31
Sbf2	AK173257	SET binding factor 2	1443762_s_at	319934	0.0001	-2.27169	6887954	0.0179158	-1.21
Scarf1	NM_001004157	scavenger receptor class F member 1	1434490_at	380713	0	-2.18531	6782449	0.0378816	-1.21
Scn1b	NM_011322	sodium channel voltage-gated type I beta	1418738_at	20266	0	3.1796	6966356	0.000134254	2.51
Scnn1g	NM_011326	sodium channel nonvoltage-gated 1 gamma	1419079_at	20278	0.0001	-2.56476	6964011	0.00853867	-1.31
Scrn1	NM_027268	secernin 1	1439500_at	69938	0	-3.44353	6953762	0.0039385	-1.81
Scrn2	NM_146027	secernin 2	1451822_a_at	217140	0.0117	3.5013	6783883	0.0277159	1.31
Scube2	NM_020052	signal peptide CUB domain EGF-like 2	1453486_a_at	56788	0.0003	-7.85546	6970392	0.00297155	-2.01
Sdc1	NM_011519	syndecan 1	1415943_at	20969	0	2.3078	6793226	8.17242e-07	1.71
Sdc3	NM_011520	syndecan 3	1450027_at	20970	0	-2.21976	6917389	0.0238075	-1.31
Sema3e	NM_011348	sema domain immunoglobulin domain (Ig) short basic domain secreted (semaphorin) 3E	1419717_at	20349	0.0001	-3.58551	6928880	0.0320269	-1.51
Sema3f	NM_011349	sema domain immunoglobulin domain (Ig) short basic domain secreted (semaphorin) 3 F	1420508_at	20350	0.0003	-2.93341	6998646	0.00845951	-1.51
Sema3g	NM_001025379	sema domain immunoglobulin domain (Ig) short basic domain secreted (semaphorin) 3G	1435361_at	218877	0.0003	-4.98753	6817980	0.00607596	-1.91
Sema4g	NM_011976	sema domain immunoglobulin domain (Ig) transmembrane domain (TM) and short cytoplasmic domain (semaphorin) 4G	1449202_at	26456	0.0001	3.0071	6869974	0.00160452	1.41
Serinc2	NM_172702	serine incorporator 2	1434382_at	230779	0	3.2402	6925654	2.43478e-05	2.31
Serpina3c	NM_008458	serine (or cysteine) peptidase inhibitor clade A member 3C	1421564_at	16625	0	-11.3379	6803284	0.00956426	-1.61
Serpina3n	NM_009252	serine (or cysteine) peptidase inhibitor clade A member 3N	1419100_at	20716	0.0001	-2.15657	6797579	0.00157496	-1.11
Serping1	NM_009776	serine (or cysteine) peptidase inhibitor clade G member 1	1416625_at	12258	0	-2.07684	6888324	0.00293131	-1.51
Sertad4	NM_198247	SERTA domain containing 4	1454877_at	214791	0	5.4364	6765307	0.0221045	1.61
Sesn3	NM_030261	sestrin 3	1449303_at	75747	0.0001	2.2477	6987065	8.7228e-05	1.81
Sfrp2	NM_009144	secreted frizzled-related protein 2	1448201_at	20319	0.0172	-5.23013	6898806	0.00656896	-1.71
Sfxn1	NM_027324	sideroflexin 1	1417560_at	14057	0	2.8393	6807154	0.00122228	2.01
Sgip1	NM_144906	SH3-domain GRB2-like (endophilin) interacting protein 1	1425181_at	73094	0.0005	-4.04858	6915871	0.0450251	-1.41
Sgtb	NM_144838	small glutamine-rich tetratricopeptide repeat (TPR)-containing beta	1437977_at	218544	0.0003	-2.19635	6809806	0.01758	-1.41
Sh2d3c	NM_013781	SH2 domain containing 3C	1415886_at	27387	0.0021	-2.32829	6876217	0.00769961	-1.31
Sh3bp5	NM_011894	SH3-domain binding protein 5 (BTK-associated)	1421922_at	24056	0.0032	-3.21027	6823721	0.000631953	-1.51
Sh3d19	D89677	SH3 domain protein D19	1418461_at	27059	0	2.2297	6898940	2.7248e-05	1.41
Sh3kbp1	NM_021389	SH3-domain kinase binding protein 1	1460337_at	58194	0.0001	-2.13174	7014836	0.00183936	-1.31
Sh3tc2	NM_172628	SH3 domain and tetratricopeptide repeats 2	1456020_at	225608	0.003	-4.18936	6861408	0.0393602	-1.31
Shank3	NM_021423	SH3/ankyrin domain gene 3	1419137_at	58234	0.0001	-2.83447	6832587	2.84467e-05	-1.61
She	NM_172530	src homology 2 domain-containing transforming protein E	1438227_at	214547	0	-3.6049	6899277	0.0101942	-1.51
Shmt1	NM_009171	serine hydroxymethyltransferase 1 (soluble)	1425178_s_at	20425	0.0001	3.4865	6788791	0.00032736	1.91
Sipa1	NM_011379	signal-induced proliferation associated gene 1	1416206_at	20469	0	-2.87604	6871134	0.0153206	-1.41
Siva1	NM_013929	SIVA1 apoptosis-inducing factor	1426323_x_at	30954	0	2.0604	6798272	0.00264409	1.41
Slc10a6	NM_029415	solute carrier family 10 (sodium/bile acid cotransporter family) member 6	1428776_at	75750	0.0037	-2.1395	6940565	0.0113854	-1.21
Slc12a2	NM_009194	solute carrier family 12 member 2	1417622_at	20496	0	2.6466	6861200	1.54122e-07	2.91
Slc12a5	NM_020333	solute carrier family 12 member 5	1451674_at	57138	0.0001	-2.68817	6883127	0.0170341	-1.11
Slc15a1	NM_053079	solute carrier family 15 (oligopeptide transporter) member 1	1419343_at	56643	0.0002	2.8582	6827924	0.000843684	1.81
Slc15a2	NM_021301	solute carrier family 15 (H+/peptide transporter) member 2	1417600_at	57738	0.0003	2.7891	6845444	0.000163294	2.01
Slc22a3	NM_011395	solute carrier family 22 (organic cation transporter) member 3	1420444_at	20519	0.0011	-3.62845	6853766	0.0463637	-1.51
Slc23a3	NM_194333	solute carrier family 23 (nucleobase transporters) member 3	1460042_at	22626	0	6.5142	6759773	0.000294292	2.11
Slc24a3	NM_053195	solute carrier family 24 (sodium/potassium/calcium exchanger) member 3	1424308_at	94249	0	-3.46021	6881870	0.0345434	-1.31
Slc25a10	NM_013770	solute carrier family 25 (mitochondrial carrier dicarboxylate transporter) member 10	1416954_at	27376	0	2.2634	6785446	7.60805e-06	2.01
Slc25a37	NM_026331	solute carrier family 25 member 37	1417750_a_at	67712	0	2.4131	6825638	0.00265775	1.41
Slc26a4	NM_011867	solute carrier family 26 member 4	1419725_at	23985	0.0003	3.7363	6799842	1.40199e-05	2.71
Slc29a1	NM_022880	solute carrier family 29 (nucleoside transporters) member 1	1451782_a_at	63959	0.0098	-2.43132	6855615	0.000291121	-1.41
Slc36a2	NM_153170	solute carrier family 36 (proton/amino acid symporter) member 2	1436521_at	246049	0.0003	-3.75375	6788401	0.028375	-1.41
Slc40a1	NM_016917	solute carrier family 40 (iron-regulated transporter) member 1	1417061_at	53945	0.0015	2.5706	6758435	0.00158304	1.61
Slc43a3	NM_021398	solute carrier family 43 member 3	1422788_at	58207	0.0002	-3.96197	6878713	0.00389642	-1.41
Slc44a3	NM_145394	solute carrier family 44 member 3	1425109_at	213603	0	2.1757	6908775	1.35768e-06	1.71
Slc4a4	NM_018760	solute carrier family 4 (anion exchanger) member 4	1434096_at	54403	0	2.3773	6932240	7.09937e-06	1.51
Slfn5	NM_183201	schlafen 5	1456288_at	327978	0.0189	-2.82965	6782979	0.00327204	-1.51
Slit3	NM_011412	slit homolog 3 (Drosophila)	1452296_at	20564	0.0017	-4.71476	6779995	0.00201623	-1.41
Smad6	NM_008542	MAD homolog 6 (Drosophila)	1422771_at	17130	0.0003	-3.85951	6996263	0.0445745	-1.31
Smad7	NM_001042660	MAD homolog 7 (Drosophila)	1443771_x_at	17131	0.0158	-3.88048	6862133	0.0176885	-1.11
Smtn	NM_013870	smoothelin	1452469_a_at	29856	0.0083	-2.21533	6785609	0.00788851	-1.21
Smurf1	NM_029438	SMAD specific E3 ubiquitin protein ligase 1	1428396_at	75788	0.002	7.6781	6942977	6.88051e-05	1.71
Snai2	NM_011415	snail homolog 2 (Drosophila)	1447643_x_at	20583	0	-2.79642	6839624	0.00333215	-1.31
Snx7	NM_029655	sorting nexin 7	1428527_at	76561	0.0011	2.4572	6908569	0.00783032	1.61
Sod3	NM_011435	superoxide dismutase 3 extracellular	1417633_at	20657	0	-3.13087	6930799	0.0187682	-1.91
Sorbs1	NM_178362	sorbin and SH3 domain containing 1	1436737_a_at	20411	0.0001	-3.57654	6873068	0.00526719	-1.51
Sorbs2	NM_172752	sorbin and SH3 domain containing 2	1437197_at	234214	0.0024	2.7191	6975861	0.000151823	1.61
Sorcs2	NM_030889	sortilin-related VPS10 domain containing receptor 2	1419358_at	81840	0.0004	2.2432	6937466	9.51543e-05	1.51
Sox11	NM_009234	SRY-box containing gene 11	1436790_a_at	20666	0.0014	-6.31712	6799578	0.0132878	-1.41
Sox13	NM_011439	SRY-box containing gene 13	1450191_a_at	20668	0.0001	-3.10752	6762304	0.000133875	-1.41
Sox18	NM_009236	SRY-box containing gene 18	1449135_at	20672	0	-3.1407	6894310	0.00940628	-1.11
Sox7	NM_011446	SRY-box containing gene 7	1416564_at	20680	0	-3.48311	6819744	0.00281241	-1.61
Spc24	BC086683	SPC24 NDC80 kinetochore complex component homolog (S. cerevisiae)	1431087_at	67629	0.0023	3.5315	6993833	0.0174552	1.31
Spc25	AK011893	SPC25 NDC80 kinetochore complex component homolog (S. cerevisiae)	1424118_a_at	66442	0.0001	2.2634	6887520	0.00230924	1.71
Spint1	AF099018	serine protease inhibitor Kunitz type 1	1416627_at	20732	0	3.1119	6880508	3.62594e-08	2.11
Spock2	NM_052994	sparc/osteonectin cwcv and kazal-like domains proteoglycan 2	1435026_at	94214	0	-4.28449	6768151	0.00853923	-1.61
Spon1	NM_145584	spondin 1 (f-spondin) extracellular matrix protein	1424415_s_at	233744	0.0003	-4.24268	6963590	0.0127877	-1.51
Spred1	NM_033524	sprouty protein with EVH-1 domain 1 related sequence	1423161_s_at	114715	0.0003	2.2622	6880322	1.22705e-06	1.71
Sspn	NM_010656	sarcospan	1417644_at	16651	0.003	-2.33973	6951054	0.0371225	-1.11
Sstr4	NM_009219	somatostatin receptor 4	1457440_at	20608	0.0001	-2.94291	6882030	0.0301642	-1.01
St14	NM_011176	suppression of tumorigenicity 14 (colon carcinoma)	1418076_at	19143	0	3.1089	6994353	0.00332527	1.61
St3gal2	NM_178048	ST3 beta-galactoside alpha-2 3-sialyltransferase 2	1421892_at	20444	0.0041	-2.46427	6979111	0.00782109	-1.31
St8sia6	NM_145838	ST8 alpha-N-acetyl-neuraminide alpha-2 8-sialyltransferase 6	1456147_at	241230	0	7.8103	6884820	0.00012659	6.31
Stab1	NM_138672	stabilin 1	1450199_a_at	192187	0	-2.80191	6823709	0.0480049	-1.31
Stard10	NM_019990	START domain containing 10	1448956_at	56018	0.0001	2.4676	6963003	0.000598695	1.91
Stard9	XM_001004201	START domain containing 9	1436324_at	668880	0.0001	-4.53104	6880603	0.0336877	-1.41
Stk10	NM_009288	serine/threonine kinase 10	1417751_at	20868	0.0015	-2.1575	6779855	0.0448416	-1.21
Stk39	NM_016866	serine/threonine kinase 39 STE20/SPS1 homolog (yeast)	1419551_s_at	53416	0	7.8881	6887450	0.000109664	2.01
Stmn2	NM_025285	stathmin-like 2	1423281_at	20257	0.0001	-4.55996	6895589	0.000775726	-1.91
Strbp	NM_009261	spermatid perinuclear RNA binding protein	1452061_s_at	20744	0.0002	2.8409	6886117	0.00274108	1.41
Stx19	NM_026588	syntaxin 19	1425290_at	68159	0.0008	2.7823	6842008	0.00150083	1.71
Stxbp1	NM_009295	syntaxin binding protein 1	1420505_a_at	20910	0.0005	-2.40732	6885912	0.0238985	-1.41
Sult2b1	NM_017465	sulfotransferase family cytosolic 2B member 1	1417335_at	54200	0.0002	6.3029	6967006	0.000180581	1.81
Sult5a1	NM_020564	sulfotransferase family 5A member 1	1449816_at	57429	0.0001	-2.26552	6985975	0.00642768	-1.21
Svep1	NM_022814	sushi von Willebrand factor type A EGF and pentraxin domain containing 1	1419182_at	64817	0	-3.23102	6921994	0.00771271	-1.41
Syn2	NM_013681	synapsin II	1428460_at	20965	0.0004	-2.02593	6949191	0.0330099	-1.21
Syne1	NM_001079686	synaptic nuclear envelope 1	1455493_at	64009	0	-3.18167	6765551	0.0288461	-1.51
Synpo2	AK035258	synaptopodin 2	1452879_at	118449	0.0006	-2.68889	6908927	0.047964	-1.31
Syt12	NM_134164	synaptotagmin XII	1422878_at	171180	0.0001	6.3561	6871004	0.00320496	1.61
Tacstd1	NM_008532	tumor-associated calcium signal transducer 1	1416579_a_at	17075	0	3.0481	6852882	0.00105381	2.51
Tacstd2	NM_020047	tumor-associated calcium signal transducer 2	1423323_at	56753	0.0001	2.328	6954425	1.8602e-06	2.01
Tal1	NM_011527	T-cell acute lymphocytic leukemia 1	1449389_at	21349	0	-2.73149	6916487	0.00969726	-1.11
Tanc2	NM_181071	tetratricopeptide repeat ankyrin repeat and coiled-coil containing 2	1436513_at	77097	0.0023	2.6187	6784578	1.02671e-05	1.61
Tbkbp1	NM_198100	TBK1 binding protein 1	1435183_at	73174	0.0002	-2.07297	6791174	0.0144125	-1.31
Tbx3	NM_011535	T-box 3	1448029_at	21386	0.0005	-3.93701	6933913	0.0111405	-1.41
Tbx4	NM_011536	T-box 4	1456033_at	21387	0	-2.29832	6783225	0.000654356	-1.61
Tcf21	NM_011545	transcription factor 21	1417447_at	21412	0.0004	-6.36537	6772723	0.00133213	-2.21
Tcfcp2l1	AK143960	transcription factor CP2-like 1	1418091_at	81879	0.001	2.3001	6752425	2.26047e-05	1.91
Tgfa	NM_031199	transforming growth factor alpha	1421943_at	21802	0	2.0644	6947596	0.00924757	1.31
Tgfb1i1	NM_009365	transforming growth factor beta 1 induced transcript 1	1418136_at	21804	0.0004	-2.07211	6964394	0.00377708	-1.21
Tgif1	NM_009372	TG interacting factor 1	1422286_a_at	21815	0.0003	2.9187	6857022	0.00361778	1.31
Tgoln1	NM_009443	trans-golgi network protein	1418520_at	22134	0.0001	2.0846	6954638	6.69295e-05	1.61
Thbd	NM_009378	thrombomodulin	1448529_at	21824	0.0002	-3.19183	6891879	0.00989271	-1.61
Thsd4	NM_001040426	thrombospondin type I domain containing 4	1455262_at	207596	0	2.4582	6996124	5.87966e-07	1.51
Tk1	NM_009387	thymidine kinase 1	1416258_at	21877	0.0006	2.5928	6792601	0.00382015	1.51
Tm7sf4	NM_029422	transmembrane 7 superfamily member 4	1431970_at	75766	0	2.1333	6829971	0.0280025	1.41
Tmc4	NM_181820	transmembrane channel-like gene family 4	1427178_at	353499	0	3.1722	6973479	1.33849e-05	2.21
Tmc7	NM_172476	transmembrane channel-like gene family 7	1456981_at	209760	0.0027	2.2354	6970840	0.000378116	1.21
Tmcc2	NM_178874	transmembrane and coiled-coil domains 2	1452666_a_at	68875	0.0001	-4.73261	6762217	0.0156335	-1.31
Tmcc3	NM_172051	transmembrane and coiled coil domains 3	1434252_at	319880	0.0023	-3.33556	6769928	0.0268561	-1.41
Tmeff1	NM_021436	transmembrane protein with EGF-like and two follistatin-like domains 1	1426649_at	230157	0.0001	-3.2457	6913348	0.0138679	-1.51
Tmeff2	NM_019790	transmembrane protein with EGF-like and two follistatin-like domains 2	1419073_at	56363	0.0001	-4.01929	6749346	0.00225392	-1.81
Tmem100	NM_026433	transmembrane protein 100	1449533_at	67888	0.0002	-4.93827	6783484	0.00601469	-1.91
Tmem139	BC096053	transmembrane protein 139	1436556_at	109218	0	2.7421	6945776	0.000215527	1.91
Tmem140	BC020080	transmembrane protein 140	1424354_at	68487	0	-2.51067	6945339	0.00925675	-1.21
Tmem163	NM_028135	transmembrane protein 163	1428077_at	72160	0.0002	2.156	6761964	4.28424e-05	1.51
Tmem16a	NM_178642	transmembrane protein 16A	1459713_s_at	101772	0	2.5202	6972473	9.4244e-08	2.01
Tmem2	NM_031997	transmembrane protein 2	1424711_at	83921	0	-2.28938	6868650	0.0314506	-1.41
Tmem42	NM_025339	transmembrane protein 42	1421127_at	66079	0.0004	2.1619	6993099	0.0025925	1.61
Tmem44	NM_172614	transmembrane protein 44	1455044_at	224090	0	-3.58295	6845042	0.024333	-1.31
Tmem54	NM_025452	transmembrane protein 54	1417895_a_at	66260	0	7.2063	6917273	0.00114028	2.51
Tmem62	NM_175285	transmembrane protein 62	1455350_at	96957	0	2.1702	6880623	0.000999952	1.81
Tmem79	BC003309	transmembrane protein 79	1430483_a_at	71913	0	2.882	6906738	0.000148176	1.91
Tmod2	NM_001038710	tropomodulin 2	1435060_at	50876	0.0001	-4.13736	6996952	0.0109535	-1.61
Tmtc1	NM_198967	transmembrane and tetratricopeptide repeat containing 1	1439855_at	387314	0.0008	-2.25683	6958407	0.0178587	-1.41
Tnfrsf12a	NM_013749	tumor necrosis factor receptor superfamily member 12a	1418572_x_at	27279	0	3.3783	6854260	0.00236997	2.01
Tnfrsf21	NM_178589	tumor necrosis factor receptor superfamily member 21	1422740_at	94185	0.0014	3.1904	6850502	7.85122e-05	2.31
Tnfsf10	NM_009425	tumor necrosis factor (ligand) superfamily member 10	1459913_at	22035	0.0001	-3.31565	6896354	6.85222e-05	-1.61
Tnfsf13b	NM_033622	tumor necrosis factor (ligand) superfamily member 13b	1460255_at	24099	0	-2.06526	6973937	0.0200034	1.21
Tnfsf9	NM_009404	tumor necrosis factor (ligand) superfamily member 9	1422924_at	21950	0	6.1458	6851309	0.016477	2.21
Tnik	AK122306	TRAF2 and NCK interacting kinase	1455256_at	665113	0	-3.15259	6896424	0.0285086	-1.41
Tnxb	NM_031176	tenascin XB	1450798_at	81877	0.0011	-2.43665	6850066	0.020586	-1.31
Tom1l1	NM_028011	target of myb1-like 1 (chicken)	1451117_a_at	71943	0	3.6572	6790774	0.000225244	1.81
Tox	NM_145711	thymocyte selection-associated HMG box gene	1442039_at	252838	0	3.1624	6919417	0.00173768	1.51
Tpcn1	NM_145853	two pore channel 1	1434930_at	252972	0	-2.05339	6941637	0.00808042	-1.41
Tpst1	NM_013837	protein-tyrosine sulfotransferase 1	1421733_a_at	22021	0	-2.9656	6934652	0.030305	-1.21
Traf4	NM_009423	Tnf receptor associated factor 4	1460642_at	22032	0.0006	2.4774	6789939	1.08216e-05	2.01
Treml4	NM_001033922	triggering receptor expressed on myeloid cells-like 4	1460014_at	224840	0.0006	-5.06586	6850821	0.0406802	-1.11
Trib2	NM_144551	tribbles homolog 2 (Drosophila)	1426640_s_at	217410	0	-2.54907	6799173	0.000209159	-1.31
Trim37	NM_197987	tripartite motif protein 37	1436394_at	68729	0.0001	-2.12044	6783297	0.0365064	1.21
Tspan1	NM_133681	tetraspanin 1	1417958_at	66805	0	3.3824	6924770	0.000949423	2.41
Tspan11	NM_026743	tetraspanin 11	1436626_at	68498	0.0006	2.4995	6950030	0.0027702	2.11
Tspan12	NM_173007	tetraspanin 12	1454604_s_at	269831	0.0062	-2.44978	6952070	0.0441683	-1.11
Tspan18	NM_183180	tetraspanin 18	1442174_at	241556	0.0001	-3.66569	6888891	0.0337707	-1.31
Tspan7	NM_019634	tetraspanin 7	1417502_at	21912	0.0001	-3.99042	7009941	0.0250615	-1.71
Tspan8	NM_146010	tetraspanin 8	1420017_at	216350	0	2.4574	6770901	7.23798e-06	1.91
Tst	NM_009437	thiosulfate sulfurtransferase mitochondrial	1448609_at	22117	0.0001	2.5849	6837013	0.0209548	1.51
Ttc28	AK132014	tetratricopeptide repeat domain 28	1449520_at	209683	0.0002	-2.51636	6933476	0.0190013	-1.51
Ttc7	NM_028639	tetratricopeptide repeat domain 7	1435334_at	225049	0	2.124	6852874	4.47135e-05	1.41
Ttc7b	XM_975837	tetratricopeptide repeat domain 7B	1433460_at	104718	0	-2.98507	6803098	0.00270208	-1.31
Ttc9	NM_001033149	tetratricopeptide repeat domain 9	1455649_at	69480	0	3.0786	6796466	0.000992364	2.11
Ttyh3	NM_175274	tweety homolog 3 (Drosophila)	1454978_at	78339	0.003	-2.33918	6942737	0.0183828	-1.31
Tubb4	NM_009451	tubulin beta 4	1423221_at	22153	0.0001	-4.59348	6856279	0.0142473	-1.61
Tusc5	NM_177709	tumor suppressor candidate 5	1441096_at	237858	0.0034	-3.36134	6782533	0.00237437	-1.41
Tyms	BC020139	thymidylate synthase	1424991_s_at	22171	0	2.0042	6936981	0.000434321	1.41
Ube2c	NM_026785	ubiquitin-conjugating enzyme E2C	1452954_at	68612	0.0001	2.9435	6883114	0.041003	2.01
Ubxd3	NM_178671	UBX domain containing 3	1426007_a_at	212190	0.001	3.2065	6926301	0.0107722	1.41
Unc45b	NM_178680	unc-45 homolog B (C. elegans)	1436939_at	217012	0	-3.3761	6782977	0.00225648	-1.51
Unc5c	NM_009472	unc-5 homolog C (C. elegans)	1449522_at	22253	0.0011	-3.14961	6901898	0.00330556	-1.31
Upk1b	NM_178924	uroplakin 1B	1435831_at	22268	0.0002	-5.75705	6845587	0.0165218	-1.51
Upk3b	NM_175309	uroplakin 3B	1454881_s_at	100647	0.0005	-7.61035	6934969	0.00254787	-1.71
Vav3	NM_146139	vav 3 oncogene	1417122_at	57257	0.0008	-2.80426	6900456	0.0238506	-1.31
Vegfc	NM_009506	vascular endothelial growth factor C	1419417_at	22341	0	-3.11818	6976200	0.00981978	-1.31
Vgll3	AK007165	vestigial like 3 (Drosophila)	1430596_s_at	73569	0.001	-5.04796	6842129	0.00125227	-1.71
Vill	NM_011700	villin-like	1426022_a_at	22351	0.0002	3.6661	6992866	1.4228e-05	2.21
Vsnl1	NM_012038	visinin-like 1	1420955_at	26950	0.0001	-5.15464	6798951	0.00377508	-1.41
Vtn	NM_011707	vitronectin	1455098_a_at	22370	0	-6.13497	6782702	0.0244021	-1.41
Vwf	NM_011708	Von Willebrand factor homolog	1435386_at	22371	0.0001	-3.05904	6949884	0.0325383	-1.31
Wasf3	NM_145155	WAS protein family member 3	1455722_at	245880	0	-3.34896	6935534	0.000110579	-1.61
Wdr16	NM_027963	WD repeat domain 16	1429552_at	71860	0	9.2246	6789167	0.00326983	1.81
Wdr6	NM_031392	WD repeat domain 6	1415770_at	83669	0	2.1825	6998706	0.00114419	1.61
Wdr77	NM_027432	WD repeat domain 77	1422844_a_at	70465	0	2.0833	6900236	1.02378e-05	1.51
Wnk4	NM_175638	WNK lysine deficient protein kinase 4	1427196_at	69847	0	3.9982	6784254	4.34114e-06	1.61
Wnt2	NM_023653	wingless-related MMTV integration site 2	1449425_at	22413	0	-6.47249	6951974	0.0439605	-1.41
Wscd1	NM_177618	WSC domain containing 1	1455845_at	216881	0	-4.51264	6782201	0.00398277	-1.31
Zdhhc14	NM_146073	zinc finger DHHC domain containing 14	1438975_x_at	224454	0.0006	-3.27439	6848479	0.0280814	-1.31
Zdhhc3	NM_026917	zinc finger DHHC domain containing 3	1423646_at	69035	0	2.1847	6999642	1.56616e-05	1.91
Zfp365	NM_178679	zinc finger protein 365	1433583_at	216049	0.0001	-2.96121	6774704	0.00810135	-1.61
Zfp7	NM_145916	zinc finger protein 7	1451323_at	223669	0	2.1248	7016538	0.000356144	1.31
Zmat3	NM_009517	zinc finger matrin type 3	1449353_at	22401	0	2.6164	6904047	0.000361832	1.41
Zyx	NM_011777	zyxin	1417240_at	22793	0	-2.11104	6945786	0.00497163	-1.31
