# Supplementary material for: A Cross-Platform Comparison of Genome-Wide Expression Changes of Laser Microdissected Lung Tissue of C-Raf Transgenic Mice Using 3′IVT and Exon Array
Source: PLoS One. 2012 Jul 16;7(7):e40778. doi: 10.1371/journal.pone.0040778 (PMC3397940; doi:10.1371/journal.pone.0040778)
Supplement: File S6 — List of genes found common in 3′IVT and exon array while comparing dysplasia vs non-transgenic groups. 3′IVT array analyzed with ArrayTrack software with parameters as false detection rate (FDR) <0.001, fold change of ≥2, mean channel intensity (MCI) of 100, bad flag of 5. For exon array differential gene expression fold change obtained using Biotique XRAY software at full probeset level with p<0.05 using a minimum probeset per gene of 2 and a minimum of 2 probes per probeset. (XLS) [file pone.0040778.s011.xls]

## Sheet: Sheet1
Gene symbol	NCBI annotation	gene discription	GEN_ID_MFR 3'IVT	LOCUSID 3'IVT	p value 3'IVT	fold change 3'IVT array	probe id exon array	p value exon array for gene expression	fold change exon array_full probeset level
0610040J01Rik	NM_029554	RIKEN cDNA 0610040J01 gene	1424404_at	76261	0	3.634	6931168	0.00216053	2.11
1110006O17Rik	NM_001033141	RIKEN cDNA 1110006O17 gene	1437451_at	68545	0	-2.87191	6864608	0.00172603	-1.61
1110012J17Rik	NM_172963	RIKEN cDNA 1110012J17 gene	1442363_at	68617	0	2.5893	6856710	0.0016436	1.61
1110018M03Rik	NM_026271	RIKEN cDNA 1110018M03 gene	1419376_at	67606	0.0004	-5.77367	6889661	0.000244258	-2.31
1110032E23Rik	NM_133187	RIKEN cDNA 1110032E23 gene	1416805_at	68659	0	-3.63901	6898630	0.00123472	-2.21
1190002N15Rik	NM_001033145	RIKEN cDNA 1190002N15 gene	1433581_at	68861	0	-3.87597	6997917	0.00346318	-1.91
1200009I06Rik	NM_028807	RIKEN cDNA 1200009I06 gene	1428420_a_at	74190	0.0003	-2.22074	6798212	0.00802709	-1.51
1200009O22Rik	NM_025817	RIKEN cDNA 1200009O22 gene	1452961_at	66873	0.0001	-3.95101	6953721	0.000885983	-1.91
1200015N20Rik	NM_024244	RIKEN cDNA 1200015N20 gene	1436761_s_at	71721	0.0002	-3.63504	6768621	3.42246e-05	-1.81
1300014I06Rik	NM_025831	RIKEN cDNA 1300014I06 gene	1428851_at	66895	0	-3.62319	6812250	0.0189742	-1.41
1810011O10Rik	NM_026931	RIKEN cDNA 1810011O10 gene	1435595_at	69068	0	-3.28623	6981091	0.00293261	-2.41
1810019J16Rik	NM_133707	RIKEN cDNA 1810019J16 gene	1417798_at	69073	0.0006	2.4718	6917591	0.00107288	1.51
2010001K21Rik	AK008011	RIKEN cDNA 2010001K21 gene	1447576_at	69829	0.0043	2.5768	6806819	0.0226886	1.61
2010004A03Rik	NM_029646	RIKEN cDNA 2010004A03 gene	1431920_a_at	76527	0	2.2407	6985328	0.00174014	1.51
2010300C02Rik	AK039052	RIKEN cDNA 2010300C02 gene	1452861_at	72097	0	2.6644	6757979	2.24275e-05	2.21
2200002D01Rik	AK008617	RIKEN cDNA 2200002D01 gene	1428671_at	72275	0	4.1766	6966197	0.00079779	2.11
2210023G05Rik	NM_197999	RIKEN cDNA 2210023G05 gene	1424968_at	72361	0	-6.07903	6978794	0.00744177	-2.31
2310009E04Rik	NM_029347	RIKEN cDNA 2310009E04 gene	1452799_at	75578	0.0002	-2.41196	6915559	0.0002154	-1.31
2310010M24Rik	NM_027990	RIKEN cDNA 2310010M24 gene	1429274_at	71897	0	3.4613	6876944	0.00147634	1.71
2310016C08Rik	NM_023516	RIKEN cDNA 2310016C08 gene	1421031_a_at	69573	0	-6.43915	6944982	0.000426066	-3.21
2310040A07Rik	BC021944	RIKEN cDNA 2310040A07 gene	1452893_s_at	69638	0.0001	-3.93082	6921057	0.00130077	-1.61
2310045A20Rik	NM_172710	RIKEN cDNA 2310045A20 gene	1452227_at	231238	0	4.3686	6938217	2.09715e-05	2.01
2310047A01Rik	XM_908180	RIKEN cDNA 2310047A01 gene	1428431_at	71918	0.0014	-2.3663	6823414	8.21582e-05	-1.31
2310056P07Rik	NM_027342	RIKEN cDNA 2310056P07 gene	1451385_at	70186	0	2.7284	6845382	0.00429021	1.61
2310057J16Rik	BC048787	RIKEN cDNA 2310057J16 gene	1432464_a_at	69697	0	5.1093	6973688	1.25686e-06	2.21
2310066E14Rik	NM_001081241	RIKEN cDNA 2310066E14 gene	1424239_at	75687	0	-2.07125	6978843	2.30165e-05	-1.61
2610028H24Rik	NM_029816	RIKEN cDNA 2610028H24 gene	1453919_at	76964	0.0003	2.4859	6768925	3.52296e-05	1.91
2610203C20Rik	AK034202	RIKEN cDNA 2610203C20 gene	1455160_at	70455	0.0002	3.6195	6988454	6.55566e-05	2.61
2610204M08Rik	NM_198411	RIKEN cDNA 2610204M08 gene	1436216_s_at	70435	0.0002	2.3749	6798269	0.0126857	1.31
2810022L02Rik	BC014764	RIKEN cDNA 2810022L02 gene	1436091_at	67198	0	-3.24886	6749691	0.00205005	-1.31
2810048G17Rik	NM_133746	RIKEN cDNA 2810048G17 gene	1417218_at	72691	0	-3.21854	6873476	0.00130685	-1.51
2810055F11Rik	NM_026038	RIKEN cDNA 2810055F11 gene	1424692_at	67217	0	-2.27687	6801632	0.000264146	-1.51
2810417H13Rik	NM_026515	RIKEN cDNA 2810417H13 gene	1419152_at	68026	0.0003	2.2958	6989974	6.85678e-05	1.41
2810453I06Rik	BC012231	RIKEN cDNA 2810453I06 gene	1418389_at	67238	0.0001	-2.1004	6935406	2.4443e-06	-1.31
3110049J23Rik	NM_026085	RIKEN cDNA 3110049J23 gene	1449462_at	67307	0	10.3338	6768332	1.29849e-07	2.31
4631416L12Rik	XM_989876	RIKEN cDNA 4631416L12 gene	1429185_at	622434	0.0007	-2.11238	6897969	0.0292752	-1.41
4631427C17Rik	NM_021414	RIKEN cDNA 4631427C17 gene	1452703_at	74340	0	2.5279	6945034	9.44799e-05	2.11
4632428N05Rik	NM_028732	RIKEN cDNA 4632428N05 gene	1416619_at	74048	0.0002	-2.51319	6768157	0.00244136	-1.31
4732429D16Rik	NM_145437	RIKEN cDNA 4732429D16 gene	1424832_at	217305	0.0001	-2.05973	6792371	0.0199275	-1.11
4732435N03Rik	NM_172753	RIKEN cDNA 4732435N03 gene	1452365_at	234356	0.0064	-5.17598	6983073	0.000146911	-2.11
4922503N01Rik	NM_153392	RIKEN cDNA 4922503N01 gene	1455162_at	230603	0	3.9671	6916239	0.013357	1.91
4930486L24Rik	NM_178098	RIKEN cDNA 4930486L24 gene	1430051_at	214639	0.0001	-3.30907	6813740	0.000138583	-1.61
4930503L19Rik	NM_172967	RIKEN cDNA 4930503L19 gene	1454701_at	269033	0.0026	-3.20821	6866504	0.0434524	-1.51
4933406E20Rik	NM_028944	RIKEN cDNA 4933406E20 gene	1428211_at	74443	0.0008	-2.17723	6998707	0.00241267	-1.31
4933412E12Rik	AK084517	RIKEN cDNA 4933412E12 gene	1447711_x_at	71086	0.0001	-2.31321	6770947	0.000964422	-1.41
4933428G20Rik	NM_021493	RIKEN cDNA 4933428G20 gene	1419745_at	58996	0	-2.43191	6783914	0.000982218	-1.61
5033414K04Rik	NM_001003948	RIKEN cDNA 5033414K04 gene	1436999_at	98496	0.0002	-3.76223	6760289	0.0381933	-1.11
5430407P10Rik	BC025867	RIKEN cDNA 5430407P10 gene	1456210_at	227545	0	4.6267	6884473	0.000371474	1.81
5430433G21Rik	AK044859	RIKEN cDNA 5430433G21 gene	1436987_at	319909	0.0003	-2.74198	6881590	0.00723175	-1.41
5730469M10Rik	NM_027464	RIKEN cDNA 5730469M10 gene	1447774_x_at	70564	0.0009	2.643	6824146	0.00389075	1.81
5730494M16Rik	NM_001004361	RIKEN cDNA 5730494M16 gene	1459875_x_at	66648	0.0001	-2.88351	6864037	0.000343455	-1.41
5730557B15Rik	NM_027496	RIKEN cDNA 5730557B15 gene	1453287_at	67434	0.0025	-4.60405	6834728	0.000626002	-1.81
5730559C18Rik	NM_028872	RIKEN cDNA 5730559C18 gene	1436345_at	67313	0.0001	8.9633	6762471	0.000129397	2.11
6330416G13Rik	BC023748	RIKEN cDNA 6330416G13 gene	1426315_a_at	230279	0.0006	2.6572	6914029	1.52398e-06	1.81
6330500D04Rik	NM_178658	RIKEN cDNA 6330500D04 gene	1460555_at	193385	0.0001	-3.2175	6805443	0.0349151	-1.31
6330512M04Rik	BC049666	RIKEN cDNA 6330512M04 gene	1455239_at	320802	0	-3.04785	6972292	0.0419314	-1.21
6430548M08Rik	BC027126	RIKEN cDNA 6430548M08 gene	1435928_at	234797	0.0034	-3.40716	6979527	0.00845327	-1.71
9030409G11Rik	NM_144531	RIKEN cDNA 9030409G11 gene	1435624_at	71529	0.0005	-2.1901	6926505	0.0151421	-1.11
9130213B05Rik	NM_145562	RIKEN cDNA 9130213B05 gene	1428891_at	231440	0	7.9191	6932409	0.000227014	3.01
9230104L09Rik	NM_029960	RIKEN cDNA 9230104L09 gene	1432531_at	77705	0	-4.58926	6891903	0.00183483	-2.61
9430020K01Rik	NM_001081963	RIKEN cDNA 9430020K01 gene	1428535_at	240185	0.0002	-3.6245	6858534	8.95686e-05	-1.91
9430073N08Rik	XM_974019	RIKEN cDNA 9430073N08 gene	1453496_at	77296	0.0001	-6.39795	6773917	0.000653312	-1.91
9530077C05Rik	NM_026739	RIKEN cDNA 9530077C05 gene	1452963_at	68283	0.0077	4.7708	6987460	0.000165886	2.01
9630050M13Rik	NM_001081161	RIKEN cDNA 9630050M13 gene	1438402_at	269233	0.0021	-4.05022	6874537	0.00279239	-1.91
9830001H06Rik	XM_283804	RIKEN cDNA 9830001H06 gene	1436132_at	320706	0.0003	-2.25887	6892497	0.014941	-1.21
A4galt	NM_001004150	alpha 1 4-galactosyltransferase	1455338_at	239559	0.0003	-2.1575	6837435	0.000276774	-1.61
A930037G23Rik	NM_178787	RIKEN cDNA A930037G23 gene	1454628_at	320678	0.003	-2.23464	6949850	0.046134	-1.41
AA409316	NM_134087	expressed sequence AA409316	1452273_at	105732	0.0001	2.7604	6836792	0.00055179	1.31
Aass	NM_013930	aminoadipate-semialdehyde synthase	1423523_at	30956	0.0013	-2.39234	6952121	6.84504e-08	-1.91
Aatk	NM_007377	apoptosis-associated tyrosine kinase	1416936_at	11302	0	-2.2477	6792733	8.40527e-06	-1.51
Abca5	NM_147219	ATP-binding cassette sub-family A (ABC1) member 5	1434474_at	217265	0.0006	-2.2805	6792129	0.00213152	-1.81
Abca8a	NM_153145	ATP-binding cassette sub-family A (ABC1) member 8a	1427371_at	217258	0.0003	-4.16667	6792114	0.00105195	-2.01
Abcb1a	NM_011076	ATP-binding cassette sub-family B (MDR/TAP) member 1A	1419758_at	18671	0.0003	-4.48229	6928740	0.000496926	-2.21
Abcb8	NM_029020	ATP-binding cassette sub-family B (MDR/TAP) member 8	1423713_at	74610	0.0005	2.5082	6929298	0.049441	1.21
Abcg2	NM_011920	ATP-binding cassette sub-family G (WHITE) member 2	1422906_at	26357	0	-2.5025	6946554	0.000693028	-1.81
Abcg3	NM_030239	ATP-binding cassette sub-family G (WHITE) member 3	1421168_at	27405	0	-5.69476	6940658	0.0150508	-1.41
Abhd11	NM_145215	abhydrolase domain containing 11	1428428_at	68758	0	2.1495	6934891	0.016815	1.21
Abhd2	NM_018811	abhydrolase domain containing 2	1440447_at	54608	0	3.006	6961913	0.000190438	1.51
Abi3	NM_025659	ABI gene family member 3	1452928_at	66610	0	-4.58295	6791063	0.00646422	-1.91
Abi3bp	NM_178790	ABI gene family member 3 (NESH) binding protein	1427053_at	320712	0.0012	-6.41437	6841712	0.00975178	-2.11
Ablim1	NM_178688	actin-binding LIM protein 1	1454708_at	226251	0	-2.58264	6874001	0.0381633	-1.31
Ablim3	NM_198649	actin binding LIM protein family member 3	1434013_at	319713	0	-4.64684	6866006	0.00172734	-1.71
Ace	NM_207624	angiotensin I converting enzyme (peptidyl-dipeptidase A) 1	1427034_at	11421	0.0002	-3.23729	6784587	9.82941e-05	-1.91
Ace2	NM_027286	angiotensin I converting enzyme (peptidyl-dipeptidase A) 2	1452138_a_at	70008	0.0018	3.8555	7015002	0.0151254	2.51
Aco1	NM_007386	aconitase 1	1423644_at	11428	0	2.6381	6912820	0.000796783	1.71
Acpl2	NM_153420	acid phosphatase-like 2	1429390_at	235534	0	2.7911	6998094	0.00461011	1.61
Acsl3	NM_001033606	acyl-CoA synthetase long-chain family member 3	1452771_s_at	74205	0	2.3776	6750868	0.00181638	1.41
Acsl4	NM_001033600	acyl-CoA synthetase long-chain family member 4	1418911_s_at	50790	0.002	4.1584	7019867	1.12305e-05	2.51
Acvrl1	NM_009612	activin A receptor type II-like 1	1435825_at	11482	0	-5.58971	6833305	0.00166789	-2.01
Adamts15	NM_001024139	a disintegrin-like and metallopeptidase (reprolysin type) with thrombospondin type 1 motif 15	1427056_at	235130	0	-3.27011	6994343	0.00135727	-1.51
Adamts8	NM_013906	a disintegrin-like and metallopeptidase (reprolysin type) with thrombospondin type 1 motif 8	1418270_at	30806	0.0022	-4.66636	6987862	0.00018122	-1.91
Adamtsl1	AK020115	ADAMTS-like 1	1442063_at	77739	0.0008	-2.66454	6915096	0.00126542	-1.41
Adamtsl4	NM_144899	ADAMTS-like 4	1451932_a_at	229595	0	-3.20718	6907202	0.00102667	-1.21
Adarb1	NM_001024838	adenosine deaminase RNA-specific B1	1434932_at	110532	0.0114	-3.05998	6775206	0.0012407	-1.61
Adck4	NM_133770	aarF domain containing kinase 4	1448490_at	76889	0.0001	3.0275	6959291	0.0101529	1.81
Adcy4	NM_080435	adenylate cyclase 4	1418098_at	104110	0	-3.34113	6824844	0.000910322	-1.91
Adcy5	NM_001012765	adenylate cyclase 5	1455296_at	224129	0	-3.52485	6840705	0.00137675	-1.51
Adcy8	NM_009623	adenylate cyclase 8	1418754_at	11514	0.0002	-7.62777	6836260	0.00104018	-2.21
Adcy9	NM_009624	adenylate cyclase 9	1418586_at	11515	0.0027	-2.13812	6843634	0.000588434	-1.31
Adcyap1	NM_009625	adenylate cyclase activating polypeptide 1	1423427_at	11516	0.0016	8.6078	6853121	3.63253e-05	2.81
Add3	NM_013758	adducin 3 (gamma)	1456162_x_at	27360	0.0053	-3.4662	6870424	0.00618009	-1.71
Adh1	NM_007409	alcohol dehydrogenase 1 (class I)	1416225_at	11522	0.0016	-2.23614	6901737	0.00375667	-1.61
Adhfe1	NM_175236	alcohol dehydrogenase iron containing 1	1424393_s_at	76187	0.0007	-3.71609	6747472	0.0262136	-1.41
Adora1	NM_001039510	adenosine A1 receptor	1435495_at	11539	0	7.3875	6762353	1.26487e-05	1.71
Adrb1	NM_007419	adrenergic receptor beta 1	1423420_at	11554	0.0012	-2.78784	6870622	0.00930122	-1.91
Adrb2	NM_007420	adrenergic receptor beta 2	1437302_at	11555	0.0003	-2.39292	6866021	0.00015626	-1.71
Adssl1	NM_007421	adenylosuccinate synthetase like 1	1449383_at	11565	0	6.8574	6798271	3.32148e-07	2.41
Aff2	NM_008032	AF4/FMR2 family member 2	1443847_x_at	14266	0.0001	-3.77644	7011776	6.33958e-05	-1.71
Aff3	NM_010678	AF4/FMR2 family member 3	1433939_at	16764	0.0001	-4.47427	6758001	0.00296713	-1.41
Agpat4	NM_026644	1-acylglycerol-3-phosphate O-acyltransferase 4 (lysophosphatidic acid acyltransferase delta)	1436640_x_at	68262	0	-4.25894	6848688	3.92559e-05	-1.71
Agtr1a	NM_177322	angiotensin II receptor type 1a	1436739_at	11607	0.0001	-4.44642	6805797	0.01484	-1.61
AI451557	NM_001033207	expressed sequence AI451557	1437176_at	102084	0.0003	-2.3663	6978318	0.00145314	-1.41
AK129302	NM_001003916	cDNA sequence AK129302	1434729_at	245522	0.0001	-2.12585	7018297	0.00311545	-1.21
Akap12	NM_031185	A kinase (PRKA) anchor protein (gravin) 12	1419706_a_at	83397	0.0014	-5.0813	6771912	0.010711	-1.51
Akap2	NM_001035532	A kinase (PRKA) anchor protein 2	1449168_a_at	11641	0.0531	-4.07332	6913777	0.00924423	-1.61
Akr1b8	NM_008012	aldo-keto reductase family 1 member B8	1448894_at	14187	0	6.756	6945308	5.96297e-09	2.11
Akr1c19	NM_001013785	aldo-keto reductase family 1 member C19	1455454_at	432720	0.0002	5.9452	6804526	4.10793e-05	1.81
Akt3	NM_011785	thymoma viral proto-oncogene 3	1435879_at	23797	0.0003	-2.82805	6764435	0.0139026	-1.71
Alas2	NM_009653	aminolevulinic acid synthase 2 erythroid	1451675_a_at	11656	0.0001	-5.28262	7014503	1.39116e-05	-2.41
Aldh1a1	NM_013467	aldehyde dehydrogenase family 1 subfamily A1	1416468_at	11668	0.0089	-2.16685	6868582	0.0310723	-1.11
Aldh2	NM_009656	aldehyde dehydrogenase 2 mitochondrial	1457155_at	11669	0.0004	-2.6441	6941685	0.000208888	-1.51
Alox12	NM_007440	arachidonate 12-lipoxygenase	1422699_at	11684	0.0001	-3.15756	6789407	0.0197397	-1.51
Als2cr4	NM_001033449	amyotrophic lateral sclerosis 2 (juvenile) chromosome region candidate 4	1435661_at	381259	0.0001	-2.31857	6758992	5.94901e-05	-1.31
Amdhd2	NM_172935	amidohydrolase domain containing 2	1434855_at	245847	0.0001	2.5627	6854335	0.0276425	1.51
Amot	NM_153319	angiomotin	1454890_at	27494	0.0001	-2.1631	7020027	0.0266419	-1.41
Amph	NM_175007	amphiphysin	1427044_a_at	218038	0.0005	-5.30504	6805103	0.0048245	-1.71
Angpt1	NM_009640	angiopoietin 1	1439066_at	11600	0.0004	-4.97265	6835353	0.00637345	-2.01
Angpt2	NM_007426	angiopoietin 2	1448831_at	11601	0	-3.96983	6980871	0.000902014	-2.11
Angptl2	NM_011923	angiopoietin-like 2	1455090_at	26360	0.0006	-2.76549	6876238	0.000358618	-1.91
Ankrd1	NM_013468	ankyrin repeat domain 1 (cardiac muscle)	1420992_at	107765	0	-5.34759	6872834	0.0134657	-1.61
Ankrd22	NM_024204	ankyrin repeat domain 22	1453239_a_at	52024	0	47.3754	6872761	2.33397e-05	4.21
Ankrd29	AK162301	ankyrin repeat domain 29	1438756_at	225187	0.0001	-3.12891	6863440	0.000176734	-1.61
Ankrd38	NM_172872	ankyrin repeat domain 38	1436425_at	242553	0.0002	-5.66893	6923676	0.000881949	-1.81
Ankrd47	NM_030697	ankyrin repeat domain 47	1456629_at	80880	0	-3.51494	6849970	0.00696383	-1.81
Ankrd50	NM_001033198	ankrin repeat domain 50	1435880_at	99696	0	-2.43487	6904405	0.0086878	-1.61
Ankrd56	NM_175270	ankyrin repeat domain 56	1438408_at	78088	0	3.671	6940039	0.000110525	2.01
Anln	NM_028390	anillin actin binding protein (scraps homolog Drosophila)	1433543_at	68743	0	3.3593	6993890	7.56666e-06	1.91
Anpep	NM_008486	alanyl (membrane) aminopeptidase	1421424_a_at	16790	0.0006	-2.20459	6968735	0.00988704	-1.41
Anxa4	NM_013471	annexin A4	1424176_a_at	11746	0.0002	2.5994	6955228	1.03439e-05	1.91
Aox1	NM_009676	aldehyde oxidase 1	1419435_at	11761	0	2.2565	6749702	0.000656602	1.61
Ap1m2	NM_009678	adaptor protein complex AP-1 mu 2 subunit	1460190_at	11768	0	2.5158	6993762	1.78113e-05	1.71
Ap1s2	NM_026887	adaptor-related protein complex 1 sigma 2 subunit	1447903_x_at	108012	0.0022	-2.38436	7014982	0.0106861	-1.31
Ap2a2	NM_007459	adaptor protein complex AP-2 alpha 2 subunit	1432007_s_at	11772	0.0006	-2.1097	6965211	0.0424346	-1.21
Apba1	NM_177034	amyloid beta (A4) precursor protein binding family A member 1	1455369_at	319924	0	-2.23015	6868728	0.000510419	-1.41
Aqp1	NM_007472	aquaporin 1	1416203_at	11826	0	-3.07882	6946406	0.000453846	-2.01
Ar	NM_013476	androgen receptor	1437064_at	11835	0.0003	-4.30293	7012730	0.00382556	-1.31
Areg	NM_009704	amphiregulin	1421134_at	11839	0	35.6302	6932394	1.17718e-06	4.91
Arg2	NM_009705	arginase type II	1438841_s_at	11847	0	8.2264	6796331	0.000375016	2.31
Arhgap11a	NM_181416	Rho GTPase activating protein 11A	1438434_at	228482	0.0005	3.089	6889894	0.00213053	1.41
Arhgap20	NM_175535	Rho GTPase activating protein 20	1429918_at	244867	0.002	-3.75657	6989086	0.00305303	-1.71
Arhgef10	NM_001037736	Rho guanine nucleotide exchange factor (GEF) 10	1452302_at	234094	0.0001	-3.49406	6974254	0.000172358	-2.01
Arhgef15	NM_177566	Rho guanine nucleotide exchange factor (GEF) 15	1457172_at	442801	0.0002	-5.39084	6789235	0.00955403	-1.81
Arhgef16	BC044805	Rho guanine nucleotide exchange factor (GEF) 16	1427386_at	230972	0	3.0455	6927212	0.00102752	1.61
Arhgef3	NM_027871	Rho guanine nucleotide exchange factor (GEF) 3	1424250_a_at	71704	0.0004	-3.14169	6817700	0.011474	-1.41
Armcx1	AK147002	armadillo repeat containing X-linked 1	1425914_a_at	78248	0	-3.31895	7013900	0.00137307	-1.71
Armcx2	NM_026139	armadillo repeat containing X-linked 2	1456739_x_at	67416	0	-2.98418	7019538	0.00403322	-1.41
Arpc1b	NM_023142	actin related protein 2/3 complex subunit 1B	1416227_at	11867	0.0001	2.2472	6935490	0.0183864	1.21
Arrb1	NM_178220	arrestin beta 1	1460444_at	109689	0.0001	-2.18627	6962880	0.00306577	-1.41
Arrdc1	NM_178408	arrestin domain containing 1	1444508_s_at	215705	0	2.2639	6885351	2.91978e-05	1.61
Arsa	NM_009713	arylsulfatase A	1460346_at	11883	0	-2.33263	6837827	6.29323e-05	-1.81
Arvcf	NM_033474	armadillo repeat gene deleted in velo-cardio-facial syndrome	1423061_at	11877	0.0002	-3.44709	6839836	0.00113915	-1.51
Asah3l	NM_139306	N-acylsphingosine amidohydrolase 3-like	1451355_at	230379	0.0007	-4.80077	6915138	3.12519e-06	-2.41
Aspa	NM_023113	aspartoacylase (aminoacylase) 2	1418472_at	11484	0	-2.48509	6789597	0.00589396	-1.51
Atad4	NM_146026	ATPase family AAA domain containing 4	1433870_at	217138	0	2.7082	6783879	0.0417962	1.51
Atf5	AF375476	activating transcription factor 5	1425927_a_at	107503	0.0001	-2.72851	6966903	0.00163503	-1.81
Atp11a	NM_015804	ATPase class VI type 11A	1421167_at	50770	0.0003	2.6811	6974113	6.20755e-06	2.21
Atp13a4	NM_172613	ATPase type 13A4	1438707_at	224079	0	25.3452	6844955	4.63264e-08	7.01
Atp1a2	NM_178405	ATPase Na+/K+ transporting alpha 2 polypeptide	1452308_a_at	98660	0	-5.50661	6764138	0.000424283	-2.31
Atp1b1	NM_009721	ATPase Na+/K+ transporting beta 1 polypeptide	1423890_x_at	11931	0.0001	2.5492	6763706	3.13793e-06	1.71
Atp6v0a1	NM_016920	ATPase H+ transporting lysosomal V0 subunit A1	1417632_at	11975	0	2.4514	6784236	2.36912e-05	1.91
Atp6v0a4	NM_080467	ATPase H+ transporting lysosomal V0 subunit A4	1422030_at	140494	0.0011	16.9188	6952818	3.42553e-05	3.91
Atp6v0e2	NM_133764	ATPase H+ transporting lysosomal V0 subunit E2	1448211_at	76252	0	-2.28938	6946004	0.0117809	-1.41
Aurka	NM_011497	aurora kinase A	1424511_at	20878	0	2.7916	6893486	5.94732e-05	1.81
Auts2	NM_177047	autism susceptibility candidate 2	1438680_at	319974	0.0023	3.1202	6942280	0.0464011	-1.11
Avpi1	NM_027106	arginine vasopressin-induced 1	1423122_at	69534	0	3.2231	6873171	0.00335292	1.71
AW061290	NM_201361	expressed sequence AW061290	1455063_at	381110	0	3.4307	6852438	0.000228452	1.21
Azin1	NM_018745	antizyme inhibitor 1	1450714_at	54375	0	3.9199	6835104	3.89147e-09	2.41
B430119L13Rik	NM_177303	RIKEN cDNA B430119L13 gene	1435648_at	320974	0.0035	-5.13084	6891115	0.000698715	-1.71
B4galnt1	NM_008080	beta-1 4-N-acetyl-galactosaminyl transferase 1	1425363_at	14421	0.0008	2.9267	6771546	0.000368103	2.11
B4galt6	NM_019737	UDP-Gal:betaGlcNAc beta 1 4-galactosyltransferase polypeptide 6	1460329_at	56386	0	6.2701	6863783	3.52204e-05	3.01
BC013672	NM_001081215	cDNA sequence BC013672	1451777_at	234311	0.0113	-3.1027	6976609	0.0381617	-1.31
BC015286	NM_198171	cDNA sequence BC015286	1457619_at	234669	0	-4.82859	6978780	0.00832871	-1.41
BC018465	NM_144890	cDNA sequence BC018465	1425046_at	228802	0.0003	-2.66809	6882444	0.00509157	-1.41
BC020535	NM_145536	cDNA sequence BC020535	1435600_s_at	228788	0.0001	-4.76644	6882350	0.00143498	-2.21
BC022623	NM_177632	cDNA sequence BC022623	1426734_at	224093	0.0001	-2.52972	6840432	0.0087622	-1.21
BC028528	NM_153513	cDNA sequence BC028528	1445301_at	229600	0.0025	-4.33463	6907222	0.00221919	-2.11
BC038479	NM_153803	cDNA sequence BC038479	1433727_at	244757	0.0002	-3.30469	6994133	0.00913189	-1.71
BC054438	NM_001001183	cDNA sequence BC054438	1447915_x_at	407831	0.0003	-5.29942	6854404	0.0008248	-1.61
BC055107	NM_183187	cDNA sequence BC055107	1434202_a_at	268709	0.0122	-5.01002	6822477	0.00532587	-2.01
BC059842	AK129152	cDNA sequence BC059842	1435279_at	230676	0	2.5199	6924887	0.00284439	1.51
BC063749	NM_001001738	cDNA sequence BC063749	1433943_at	414801	0	-2.3084	6873520	0.0443638	1.71
BC065085	NM_177628	cDNA sequence BC065085	1455872_at	219148	0	6.0379	6819722	0.00141718	2.11
Bcl2	NM_009741	B-cell leukemia/lymphoma 2	1443837_x_at	12043	0.0018	-2.13995	6761256	0.00015703	-1.31
Bcl2a1d	NM_007536	B-cell leukemia/lymphoma 2 related protein A1d	1419004_s_at	12044	0	2.7655	7002980	4.74485e-05	1.51
Bcl6b	NM_007528	B-cell CLL/lymphoma 6 member B	1418421_at	12029	0.0006	-2.68745	6789397	0.0255677	-2.11
Bcr	NM_001081412	breakpoint cluster region homolog	1452368_at	110279	0.0001	2.2511	6768848	0.00987648	1.41
Bdnf	NM_001048139	brain derived neurotrophic factor	1422169_a_at	12064	0	-3.98089	6879925	0.0238213	-1.41
Bin1	NM_009668	bridging integrator 1	1425532_a_at	30948	0.0007	-2.22222	6859814	0.0115078	-1.21
Bmp1	NM_009755	bone morphogenetic protein 1	1426238_at	12153	0	2.1844	6825704	0.00103683	1.71
Bmp4	NM_007554	bone morphogenetic protein 4	1422912_at	12159	0	2.5039	6824266	1.38335e-06	1.51
Bmper	NM_028472	BMP-binding endothelial regulator	1429273_at	73230	0	-4.28082	6987490	0.000772626	-2.21
Bmpr2	NM_007561	bone morphogenic protein receptor type II (serine/threonine kinase)	1441652_at	12168	0	-3.32226	6749785	0.00657324	-1.81
Bnc2	NM_172870	basonuclin 2	1438861_at	242509	0.0132	-2.9967	6922966	0.000184406	-1.11
Boc	NM_172506	biregional cell adhesion molecule-related/down-regulated by oncogenes (Cdon) binding protein	1426869_at	117606	0.001	-2.42483	6845943	0.00504253	-1.41
Brd7	NM_012047	bromodomain containing 7	1448521_at	26992	0	2.1802	6984061	0.00571339	1.41
Brunol4	NM_133195	bruno-like 4 RNA binding protein (Drosophila)	1426929_at	108013	0.0001	4.2862	6864062	6.0716e-05	1.41
Bst2	NM_198095	bone marrow stromal cell antigen 2	1424921_at	57261	0	-2.5	6983265	7.17564e-05	-1.81
Btbd11	NM_028709	BTB (POZ) domain containing 11	1428377_at	74007	0.0001	2.9568	6769481	0.0068922	1.61
Btc	NM_007568	betacellulin epidermal growth factor family member	1435541_at	12223	0	3.6754	6939931	0.0131676	1.91
Bub1b	NM_009773	budding uninhibited by benzimidazoles 1 homolog beta (S. cerevisiae)	1447363_s_at	12236	0.0039	2.3888	6880451	8.87654e-05	1.61
C030045D06Rik	NM_001033636	RIKEN cDNA C030045D06 gene	1436569_at	109294	0.0003	-6.20732	6747565	0.00997978	-2.11
C1qb	NM_009777	complement component 1 q subcomponent beta polypeptide	1417063_at	12260	0	3.072	6926165	0.0352929	1.31
C1qtnf2	NM_026979	C1q and tumor necrosis factor related protein 2	1431079_at	69183	0	-4.37063	6780373	0.00482603	-1.31
C1qtnf7	NM_175425	C1q and tumor necrosis factor related protein 7	1460163_at	109323	0.0001	-2.7972	6930346	0.000816108	-1.31
C1s	NM_144938	complement component 1 s subcomponent	1424041_s_at	50908	0.0001	-2.30415	6957111	0.00296872	-1.71
C2	NM_013484	complement component 2 (within H-2S)	1416051_at	12263	0.0001	-3.79651	6855062	0.00584891	-1.61
C230021P08Rik	NM_001001884	Riken cDNA C230021P08 gene	1427015_at	380969	0.0008	-2.90444	6838455	0.00119529	-1.31
Cacna1d	NM_028981	calcium channel voltage-dependent L type alpha 1D subunit	1427974_s_at	12289	0	-7.26216	6823659	0.0138617	-1.81
Calcrl	NM_018782	calcitonin receptor-like	1418489_a_at	54598	0	-5.47645	6888296	0.00421486	-1.91
Camk2d	NM_001025439	calcium/calmodulin-dependent protein kinase II delta	1427763_a_at	108058	0.0013	3.201	6901138	0.00174714	1.41
Camkk2	NM_145358	calcium/calmodulin-dependent protein kinase kinase 2 beta	1424475_at	207565	0	-2.44738	6941761	0.00791176	-1.31
Car14	NM_011797	carbonic anhydrase 14	1450725_s_at	23831	0.0002	-4.55373	6907224	0.0012386	-2.61
Car4	NM_007607	carbonic anhydrase 4	1418094_s_at	12351	0	-2.1925	6783144	0.00443897	-1.51
Card10	NM_130859	caspase recruitment domain family member 10	1449491_at	105844	0	-2.3084	6837046	0.000944785	-1.41
Casc4	NM_177054	cancer susceptibility candidate 4	1433779_at	319996	0.0004	-3.52858	6880658	0.00970292	-1.81
Casp12	NM_009808	caspase 12	1449297_at	12364	0.0008	-2.41663	6986651	0.000416344	-1.31
Casp3	NM_009810	caspase 3	1449839_at	12367	0	2.2737	6975913	1.30932e-05	1.61
Cav1	NM_007616	caveolin caveolae protein 1	1449145_a_at	12389	0.0001	-2.18675	6944372	0.00759364	-1.71
Cav2	NM_016900	caveolin 2	1425955_at	12390	0.0001	-3.44353	6944371	0.000509724	-1.91
Cblc	NM_023224	Casitas B-lineage lymphoma c	1422666_at	80794	0	4.2113	6973168	2.51811e-05	2.11
Cbln1	NM_019626	cerebellin 1 precursor protein	1423288_s_at	12404	0	12.3341	6983999	0.000139706	4.31
Ccbe1	NM_178793	collagen and calcium binding EGF domains 1	1437385_at	320924	0.001	-3.93082	6866238	0.00176482	-2.01
Ccbl1	NM_172404	cysteine conjugate-beta lyase 1	1452678_a_at	70266	0.0001	2.2809	6885751	0.00132976	1.31
Ccbp2	NM_021609	chemokine binding protein 2	1422112_at	59289	0.0008	-5.00501	6993025	4.64847e-05	-2.31
Ccdc120	NM_207202	coiled-coil domain containing 120	1428066_at	54648	0.0008	2.6469	7015411	1.93879e-05	1.51
Ccdc28b	NM_025455	coiled coil domain containing 28B	1459840_s_at	66264	0.0018	-2.84495	6925587	0.0245106	-1.51
Ccdc80	NM_026439	coiled-coil domain containing 80	1424186_at	67896	0.0007	-2.1363	6841160	0.00124697	-1.41
Ccdc85a	NM_181577	coiled-coil domain containing 85A	1427157_at	216613	0.0001	-6.20732	6786914	0.000518077	-1.81
Ccdc85b	NM_198616	coiled-coil domain containing 85B	1435589_at	240514	0	-2.75558	6871114	0.00387756	-1.71
Ccl17	NM_011332	chemokine (C-C motif) ligand 17	1419413_at	20295	0.0007	4.2479	6978336	0.00383619	1.41
Ccl19	NM_011888	chemokine (C-C motif) ligand 19	1449277_at	24047	0.0019	-2.52016	6921092	4.14629e-06	-1.81
Ccl5	NM_013653	chemokine (C-C motif) ligand 5	1418126_at	20304	0.0006	-3.28839	6790288	0.000995121	-2.31
Ccna2	NM_009828	cyclin A2	1417910_at	12428	0	2.8758	6904300	3.71103e-05	2.01
Ccnb1	NM_172301	cyclin B1	1448205_at	268697	0	3.8243	6815558	0.00029936	2.11
Ccnb2	NM_007630	cyclin B2	1450920_at	12442	0	2.8448	6996646	0.000249472	1.71
Ccnd1	NM_007631	cyclin D1	1448698_at	12443	0	2.7025	6972491	0.000107821	1.61
Ccnt2	NM_028399	cyclin T2	1427088_at	72949	0	2.2589	6752869	0.000299676	1.31
Ccrl2	NM_017466	chemokine (C-C motif) receptor-like 2	1427736_a_at	54199	0.0001	-3.88954	6998919	1.72242e-05	-2.01
Ccrn4l	NM_009834	CCR4 carbon catabolite repression 4-like (S. cerevisiae)	1425837_a_at	12457	0	2.4624	6897337	0.00090922	1.41
Cd14	NM_009841	CD14 antigen	1417268_at	12475	0	6.3356	6864700	0.00171983	2.21
Cd177	NM_026862	CD177 antigen	1424509_at	68891	0	37.2123	6965885	7.77449e-06	4.21
Cd19	NM_009844	CD19 antigen	1450570_a_at	12478	0.0006	-3.11526	6971264	0.0308972	-1.61
Cd1d1	NM_007639	CD1d1 antigen	1449130_at	12479	0.0022	-3.64431	6906635	0.0279676	-1.21
Cd274	NM_021893	CD274 antigen	1419714_at	60533	0.0002	-2.14915	6869032	0.0472678	-1.31
Cd276	NM_133983	CD276 antigen	1417599_at	102657	0.0004	3.1762	6995999	0.000342666	1.71
Cd300lg	NM_027987	CD300 antigen like family member G	1453131_at	52685	0.0001	-6.80272	6784305	0.000574186	-1.91
Cd37	NM_007645	CD37 antigen	1419206_at	12493	0.0002	-2.08812	6966960	0.00819027	-1.41
Cd40	NM_170701	CD40 antigen	1460415_a_at	21939	0	-2.99491	6883132	0.00760891	-1.71
Cd69	NM_001033122	CD69 antigen	1428735_at	12515	0.0004	-2.48385	6957384	0.0144428	-1.51
Cd79a	NM_007655	CD79A antigen (immunoglobulin-associated alpha)	1418830_at	12518	0.0007	-2.36967	6959165	0.00788353	-2.11
Cd93	NM_010740	CD93 antigen	1456046_at	17064	0.0006	-3.50877	6891880	0.000681127	-2.41
Cd97	NM_011925	CD97 antigen	1418394_a_at	26364	0.0003	-3.39213	6983799	0.00933254	-2.11
Cdc20	NM_023223	cell division cycle 20 homolog (S. cerevisiae)	1416664_at	107995	0	2.9598	6924892	0.00252724	1.91
Cdc42ep1	NM_027219	CDC42 effector protein (Rho GTPase binding) 1	1424376_at	104445	0	-2.09161	6831845	0.00182881	-1.71
Cdc42ep2	NM_026772	CDC42 effector protein (Rho GTPase binding) 2	1428750_at	104252	0.0001	-2.9753	6871163	0.000134005	-1.61
Cdca2	NM_175384	cell division cycle associated 2	1455983_at	108912	0.0001	3.527	6825544	4.12648e-05	1.61
Cdca3	NM_013538	cell division cycle associated 3	1452040_a_at	14793	0.0001	3.0159	6949814	1.35379e-06	1.71
Cdca7	NM_025866	cell division cycle associated 7	1428069_at	66953	0	2.501	6878053	0.000366445	1.51
Cdh11	NM_009866	cadherin 11	1450757_at	12552	0	-2.37473	6984824	0.0368813	-1.51
Cdh13	NM_019707	cadherin 13	1423551_at	12554	0.0013	-3.46861	6979483	0.0107496	-1.41
Cdh16	NM_007663	cadherin 16	1448906_at	12556	0	2.237	6984926	3.21504e-05	1.81
Cdh2	NM_007664	cadherin 2	1418815_at	12558	0.0005	-3.4002	6863645	0.0104545	-1.31
Cdh4	NM_009867	cadherin 4	1449422_at	12561	0.0013	-2.23214	6884101	0.00855928	-1.11
Cdh5	NM_009868	cadherin 5	1422047_at	12562	0.0024	-4.52899	6978695	0.00250887	-2.21
Cdk6	NM_009873	cyclin-dependent kinase 6	1455287_at	12571	0.0038	-2.10084	6928457	0.00865487	-1.51
Cdkn1a	NM_007669	cyclin-dependent kinase inhibitor 1A (P21)	1424638_at	12575	0.0006	3.2613	6849595	0.00365097	2.51
Cdkn3	XM_986742	cyclin-dependent kinase inhibitor 3	1430574_at	72391	0	4.3411	6818647	0.000357055	1.31
Cdo1	NM_033037	cysteine dioxygenase 1 cytosolic	1448842_at	12583	0.0002	-5.1573	6865238	0.00100882	-3.21
Cdr2	NM_007672	cerebellar degeneration-related 2	1417430_at	12585	0.0002	-5.02008	6970944	0.00160168	-1.71
Cdr2l	NM_001080929	cerebellar degeneration-related protein 2-like	1459911_at	237988	0.0093	-2.04415	6785129	0.000164642	-2.01
Cds1	NM_173370	CDP-diacylglycerol synthase 1	1428680_at	74596	0	2.5991	6932930	1.02697e-05	1.91
Celsr1	NM_009886	cadherin EGF LAG seven-pass G-type receptor 1	1418925_at	12614	0	5.526	6837604	4.99388e-06	2.81
Celsr2	NM_001004177	cadherin EGF LAG seven-pass G-type receptor 2	1435336_at	53883	0.0001	-2.39406	6908119	0.00253376	-1.21
Cenpf	NM_001081363	centromere protein F	1427161_at	108000	0.0001	4.332	6765133	0.000318622	1.31
Centd1	AK041540	centaurin delta 1	1452291_at	212285	0	-2.78319	6938568	0.025002	-1.91
Centd3	NM_139206	centaurin delta 3	1451282_at	106952	0	-6.03865	6864763	0.0015416	-2.01
Cep170	BC085106	centrosomal protein 170	1437154_at	545389	0.003	-2.34577	6764401	0.0319123	-1.21
Cep55	NM_028760	centrosomal protein 55	1452242_at	74107	0	4.8404	6869537	0.000106101	1.71
Cftr	NM_021050	cystic fibrosis transmembrane conductance regulator homolog	1420579_s_at	12638	0	-6.19579	6944397	0.000186698	-1.71
Chchd7	NM_181391	coiled-coil-helix-coiled-coil-helix domain containing 7	1444318_at	66433	0.0024	-2.14546	6911354	0.00105583	-1.31
Chia	NM_023186	chitinase acidic	1416456_a_at	81600	0	6.3827	6900239	3.17044e-05	7.61
Chka	NM_013490	choline kinase alpha	1450264_a_at	12660	0	2.3784	6867609	0.000725565	1.51
Chl1	NM_007697	cell adhesion molecule with homology to L1CAM	1435190_at	12661	0.0013	30.539	6948759	5.98121e-05	2.71
Chn1	NM_175752	chimerin (chimaerin) 1	1420545_a_at	108699	0.007	-2.06101	6887854	0.00488365	-1.41
Chrdl1	NM_031258	chordin-like 1	1434201_at	83453	0.0002	-10.4603	7019944	0.00293876	-2.51
Chrnb1	NM_009601	cholinergic receptor nicotinic beta polypeptide 1 (muscle)	1420682_at	11443	0	2.3797	6789343	6.72513e-07	1.81
Chst11	NM_021439	carbohydrate sulfotransferase 11	1428902_at	58250	0	-3.30142	6769366	0.000947664	-1.41
Chst2	NM_018763	carbohydrate sulfotransferase 2	1422758_at	54371	0.0008	-2.38493	6997990	0.00681646	-1.71
Ckmt1	NM_009897	creatine kinase mitochondrial 1 ubiquitous	1432418_a_at	12716	0.0013	9.1037	6880639	0.000168145	4.51
Clcn5	NM_016691	chloride channel 5	1420295_x_at	12728	0.0001	3.0455	7015375	4.83927e-06	1.91
Cldn1	NM_016674	claudin 1	1437932_a_at	12737	0.0002	2.4081	6844819	0.00868349	1.81
Cldn2	NM_016675	claudin 2	1417231_at	12738	0.0001	122.382	7014115	2.56591e-06	5.91
Cldn3	NM_009902	claudin 3	1434651_a_at	12739	0	4.8458	6934890	0.00230764	3.01
Cldn7	NM_016887	claudin 7	1448393_at	53624	0	3.9434	6782087	0.00493733	2.11
Clec14a	NM_025809	C-type lectin domain family 14 member a	1419468_at	66864	0.0008	-7.80031	6801076	0.00669803	-2.61
Clec1a	NM_175526	C-type lectin domain family 1 member a	1460039_at	243653	0.0001	-5.74383	6957405	0.00437388	-2.61
Clec2d	NM_053109	C-type lectin domain family 2 member d	1419477_at	93694	0.0013	-2.51509	6950125	0.00128413	-1.61
Clic4	NM_013885	chloride intracellular channel 4 (mitochondrial)	1423392_at	29876	0.0021	-2.08943	6926072	0.00112103	-1.11
Clip4	NM_030179	CAP-GLY domain containing linker protein family member 4	1435504_at	78785	0.0002	3.2135	6852068	2.31424e-06	3.21
Clmn	NM_053155	calmin	1425321_a_at	94040	0.0006	2.7198	6803319	0.000397546	1.81
Clstn2	NM_022319	calsyntenin 2	1441165_s_at	64085	0	-4.20698	7022688	0.00105592	-1.81
Clu	NM_013492	clusterin	1437689_x_at	12759	0	3.4492	6819887	3.02625e-06	3.31
Cmklr1	NM_008153	chemokine-like receptor 1	1456887_at	14747	0	-4.2337	6941173	0.00271847	-1.41
Cnn3	NM_028044	calponin 3 acidic	1456380_x_at	71994	0.0007	-4.19815	6900938	0.00758231	-1.61
Cnr2	NM_009924	cannabinoid receptor 2 (macrophage)	1450476_at	12802	0.0003	-2.19346	6917789	0.0128286	-1.11
Col12a1	NM_007730	procollagen type XII alpha 1	1434411_at	12816	0.0001	-3.61533	6997197	5.59746e-05	-1.41
Col13a1	NM_007731	procollagen type XIII alpha 1	1422866_at	12817	0	-4.37828	6774371	0.0161129	-1.41
Col15a1	NM_009928	procollagen type XV	1448755_at	12819	0.0001	2.9583	6913269	0.00976039	1.51
Col23a1	NM_153393	procollagen type XXIII alpha 1	1429209_at	237759	0.0023	-3.10849	6780856	0.00128261	-1.21
Col6a2	NM_146007	procollagen type VI alpha 2	1426947_x_at	12834	0.0011	-2.03915	6775182	0.00103449	-1.31
Colec12	NM_130449	collectin sub-family member 12	1419693_at	140792	0.0002	-2.80978	6858773	0.000822744	-1.21
Coq7	BC038681	demethyl-Q 7	1416665_at	12850	0	2.2436	6970839	0.000393985	1.61
Cox4i2	NM_053091	cytochrome c oxidase subunit IV isoform 2	1421373_at	84682	0	-6.46412	6882318	0.000163068	-2.01
Cp	AK014835	ceruloplasmin	1448735_at	12870	0.0001	-3.57654	6896032	0.00188149	-1.31
Cpe	NM_013494	carboxypeptidase E	1415949_at	12876	0.0007	-3.89408	6982918	0.00124955	-1.21
Cpm	XM_984852	carboxypeptidase M	1429413_at	70574	0.0008	2.5694	6771024	2.70501e-05	1.51
Cr2	NM_007758	complement receptor 2	1425289_a_at	12902	0.0109	-2.13447	6765460	0.0049963	-1.41
Crb3	NM_177638	crumbs homolog 3 (Drosophila)	1424809_at	224912	0.0001	2.3062	6851303	0.00168479	1.71
Creb3l1	NM_011957	cAMP responsive element binding protein 3-like 1	1419295_at	26427	0.0001	3.5518	6888797	0.00127738	2.01
Crim1	NM_015800	cysteine rich transmembrane BMP regulator 1 (chordin like)	1452253_at	50766	0.0001	-5.08647	6852351	0.00662809	-1.51
Crispld2	NM_030209	cysteine-rich secretory protein LCCL domain containing 2	1460458_at	78892	0	-5.05817	6979520	1.90187e-06	-2.11
Csf1	NM_007778	colony stimulating factor 1 (macrophage)	1460220_a_at	12977	0	-3.56252	6908048	0.00265285	-1.61
Csf2	NM_009969	colony stimulating factor 2 (granulocyte-macrophage)	1427429_at	12981	0	2.2962	6788329	0.000326904	1.61
Csf3r	NM_007782	colony stimulating factor 3 receptor (granulocyte)	1418806_at	12986	0	-3.54108	6917120	0.0365654	-1.41
Cspg4	NM_139001	chondroitin sulfate proteoglycan 4	1423341_at	121021	0	-2.28415	6989349	0.00025173	-1.51
Cstb	NM_007793	cystatin B	1422507_at	13014	0	2.931	6769080	0.000381475	1.41
Cthrc1	NM_026778	collagen triple helix repeat containing 1	1452968_at	68588	0.0001	-2.43013	6829958	0.00361591	-1.51
Ctla2a	NM_007796	cytotoxic T lymphocyte-associated protein 2 alpha	1416811_s_at	13024	0	-4.15973	6813742	9.0937e-05	-2.71
Ctps	NM_016748	cytidine 5'-triphosphate synthase	1416563_at	51797	0	2.4243	6925054	0.00103593	1.61
Ctsc	NM_009982	cathepsin C	1437939_s_at	13032	0.0002	3.17	6962376	3.44783e-06	1.81
Ctsh	NM_007801	cathepsin H	1443814_x_at	13036	0.0006	2.6639	6991264	2.59927e-05	2.81
Cxcl12	NM_001012477	chemokine (C-X-C motif) ligand 12	1417574_at	20315	0	-3.74532	6949335	0.00182465	-1.61
Cxcr4	NM_009911	chemokine (C-X-C motif) receptor 4	1448710_at	12767	0.0009	-2.05297	6762024	0.0100609	-1.01
Cxx1b	NM_001018063	CAAX box 1 homolog B (human)	1423816_at	66158	0.0002	-2.04708	7016900	0.0062957	-1.61
Cyp1a1	NM_009992	cytochrome P450 family 1 subfamily a polypeptide 1	1422217_a_at	13076	0.0179	-18.8679	6989422	0.0356318	-7.41
Cyp1b1	NM_009994	cytochrome P450 family 1 subfamily b polypeptide 1	1416612_at	13078	0	9.7138	6857483	0.000299712	3.11
Cyp27a1	NM_024264	cytochrome P450 family 27 subfamily a polypeptide 1	1417590_at	104086	0.0002	-3.30251	6750566	0.000813655	-1.91
Cyp2b10	NM_009998	cytochrome P450 family 2 subfamily b polypeptide 10	1451787_at	13088	0.0077	-2.83046	6959250	0.00914664	-1.81
Cyp2d22	NM_019823	cytochrome P450 family 2 subfamily d polypeptide 22	1419040_at	56448	0.0001	-4.40335	6837375	0.000199517	-3.01
Cyp2j9	NM_028979	cytochrome P450 family 2 subfamily j polypeptide 9	1424677_at	74519	0.0019	-3.74953	6923525	0.00039741	-1.81
Cyp4b1	AK078882	cytochrome P450 family 4 subfamily b polypeptide 1	1416194_at	13120	0.0001	-3.125	6924721	7.21235e-05	-2.11
D030011O10Rik	NM_177192	RIKEN cDNA D030011O10 gene	1455340_at	320560	0	-3.3036	6958439	0.00413444	-1.81
D10Bwg1379e	NM_001033258	DNA segment Chr 10 Brigham & Women's Genetics 1379 expressed	1435050_at	215821	0	2.2783	6772409	3.1272e-06	2.11
D10Ertd610e	NM_028027	DNA segment Chr 10 ERATO Doi 610 expressed	1419978_s_at	52666	0	-2.2805	6777917	0.0275726	-1.21
D12Ertd553e	BC049664	DNA segment Chr 12 ERATO Doi 553 expressed	1454806_at	76820	0	-4.00802	6793416	0.00323741	-1.91
D14Ertd449e	BC031854	DNA segment Chr 14 ERATO Doi 449 expressed	1428738_a_at	66039	0.0001	2.9955	6823429	0.0439372	1.41
D17H6S56E-5	NM_033075	DNA segment Chr 17 human D6S56E 5	1417822_at	110956	0	6.2365	6855068	0.000545505	3.21
D230012E17Rik	AK051866	RIKEN cDNA D230012E17 gene	1436317_at	241062	0.0002	3.4059	6758704	9.77461e-06	1.71
D2Ertd750e	NM_026412	DNA segment Chr 2 ERATO Doi 750 expressed	1420081_s_at	51944	0.0002	3.3397	6880468	1.67187e-05	1.71
D330027H18Rik	XM_149840	RIKEN cDNA D330027H18 gene	1439728_at	101359	0.0003	-4.83559	6952338	0.00209873	-1.51
D930028F11Rik	BC085195	RIKEN cDNA D930028F11 gene	1456111_at	244853	0	-3.25309	6988898	0.00114577	-2.01
Dach1	NM_001038610	dachshund 1 (Drosophila)	1433743_at	13134	0.0001	-5.22739	6826883	0.0284405	-1.11
Dap	NM_146057	death-associated protein	1423790_at	223453	0	2.5782	6829504	0.00996702	1.51
Dchs1	BC058536	dachsous 1 (Drosophila)	1429163_at	233651	0.0013	-2.30574	6970150	0.00264888	-1.61
Dclk1	NM_019978	doublecortin-like kinase 1	1435940_at	13175	0.0006	3.5048	6897599	2.79628e-05	1.51
Dcxr	NM_026428	dicarbonyl L-xylulose reductase	1419456_at	67880	0	3.4059	6792813	0.0430517	1.71
Ddah1	NM_026993	dimethylarginine dimethylaminohydrolase 1	1429298_at	69219	0	-3.39443	6902162	6.00167e-05	-2.31
Ddc	NM_016672	dopa decarboxylase	1426215_at	13195	0	-4.47828	6786045	0.00099332	-1.41
Ddr2	NM_022563	discoidin domain receptor family member 2	1455688_at	18214	0	-2.25378	6764010	0.000267491	-1.51
Dennd2a	NM_172477	DENN/MADD domain containing 2A	1433500_at	209773	0.0001	-3.0722	6952950	0.000299005	-1.41
Dennd2d	NM_028110	DENN/MADD domain containing 2D	1438712_at	72121	0.0001	2.2368	6900254	7.11316e-09	1.51
Des	NM_010043	desmin	1426731_at	13346	0.0011	-2.69324	6750625	0.000779199	-1.61
Dgkh	NM_001081336	diacylglycerol kinase eta	1457213_a_at	380921	0.0018	-2.48385	6826235	0.00169456	-2.01
Disp2	NM_170593	dispatched homolog 2 (Drosophila)	1435404_at	214240	0.0003	-2.24366	6880467	0.00305289	-1.61
Dkk3	NM_015814	dickkopf homolog 3 (Xenopus laevis)	1448669_at	50781	0	-2.32019	6970496	0.0148744	-1.41
Dlc1	NM_015802	deleted in liver cancer 1	1450206_at	50768	0.0272	-3.6049	6981757	0.0251706	-1.51
Dlk1	NM_010052	delta-like 1 homolog (Drosophila)	1449939_s_at	13386	0	83.8672	6797978	2.92079e-05	3.41
Dll1	NM_007865	delta-like 1 (Drosophila)	1419204_at	13388	0	-2.56739	6853934	0.000341876	-1.71
Dll4	NM_019454	delta-like 4 (Drosophila)	1421827_at	54485	0.0002	-2.61849	6880513	0.00803623	-1.91
Dmkn	NM_172899	dermokine	1428781_at	73712	0	28.1326	6959617	0.00702612	2.81
Dmn	NM_207663	desmuslin	1455610_at	233335	0	-3.46141	6968041	0.000609156	-1.71
Dmpk	NM_032418	dystrophia myotonica-protein kinase	1434944_at	13400	0	-2.67881	6958984	0.00213592	-1.51
Dock6	NM_177030	dedicator of cytokinesis 6	1427240_at	319899	0.0007	-2.18198	6993835	0.00585838	-1.81
Dos	NM_015761	downstream of Stk11	1438370_x_at	216164	0	4.9887	6775343	2.16218e-06	1.91
Dpep1	NM_007876	dipeptidase 1 (renal)	1419674_a_at	13479	0.0003	-5.05817	6979680	0.000839262	-1.91
Dpp9	NM_172624	dipeptidylpeptidase 9	1455884_at	224897	0	2.2743	6856210	0.000714397	2.01
Dpt	NM_019759	dermatopontin	1418511_at	56429	0	-2.69324	6754735	0.000601733	-2.01
Dpyd	NM_170778	dihydropyrimidine dehydrogenase	1427946_s_at	99586	0.0003	-3.83877	6900821	0.000762516	-1.31
Dtnb	NM_007886	dystrobrevin beta	1437651_a_at	13528	0.0012	2.6801	6792942	8.70436e-05	1.71
Dtx1	NM_008052	deltex 1 homolog (Drosophila)	1425822_a_at	14357	0.0022	-2.43191	6941645	0.0011315	-1.21
Dusp3	NM_028207	dual specificity phosphatase 3 (vaccinia virus phosphatase VH1-related)	1434472_at	72349	0.0006	-2.01005	6791528	0.0103371	-1.71
Dusp4	NM_176933	dual specificity phosphatase 4	1428834_at	319520	0.0001	2.7772	6975335	3.55235e-05	1.51
Dusp6	NM_026268	dual specificity phosphatase 6	1415834_at	67603	0.0001	2.2792	6770160	0.000385923	1.71
Dusp8	NM_008748	dual specificity phosphatase 8	1418714_at	18218	0.0095	-3.76648	6972260	0.00300928	-1.91
E030010A14Rik	NM_183160	RIKEN cDNA E030010A14 gene	1437595_at	226040	0.0001	7.9526	6868809	0.0354951	1.71
E130112L23Rik	BC058405	RIKEN cDNA E130112L23 gene	1455810_a_at	268739	0.0001	2.4532	6819032	0.0033027	1.31
E130203B14Rik	NM_178791	RIKEN cDNA E130203B14 gene	1455050_at	320736	0	-2.93772	6818104	0.000293014	-1.91
Ebf1	NM_007897	early B-cell factor 1	1416301_a_at	13591	0.0009	-3.79363	6780443	0.0176051	-1.51
Ecm2	NM_001012324	extracellular matrix protein 2 female organ and adipocyte specific	1440096_at	407800	0.0006	-5.96303	6806956	0.00253523	-1.81
Ect2	NM_007900	ect2 oncogene	1419513_a_at	13605	0.0009	3.6342	6903753	7.4476e-06	2.21
Edg1	NM_007901	endothelial differentiation sphingolipid G-protein-coupled receptor 1	1423571_at	13609	0.0015	-3.78358	6908461	0.0019965	-1.01
Edg2	NM_010336	endothelial differentiation lysophosphatidic acid G-protein-coupled receptor 2	1417143_at	14745	0.0076	-2.46305	6922004	0.0118979	-1.41
Edg3	NM_010101	endothelial differentiation sphingolipid G-protein-coupled receptor 3	1437173_at	13610	0	-3.80952	6807007	0.00113127	-2.51
Edil3	NM_010103	EGF-like repeats and discoidin I-like domains 3	1433474_at	13612	0	-5.35045	6808773	0.00013568	-1.71
Edn1	NM_010104	endothelin 1	1451924_a_at	13614	0.0114	-4.19287	6806566	0.000700683	-2.11
Ednra	NM_010332	endothelin receptor type A	1451691_at	13617	0.0123	-2.97708	6983531	0.00277611	-1.41
Ednrb	NM_007904	endothelin receptor type B	1437347_at	13618	0.0008	-5.82751	6827159	0.00216769	-2.41
Efemp1	NM_146015	epidermal growth factor-containing fibulin-like extracellular matrix protein 1	1427183_at	216616	0.0008	-3.68732	6779672	1.75101e-05	-1.71
Efnb2	NM_010111	ephrin B2	1419638_at	13642	0.0016	-3.20307	6980270	0.0165844	-1.51
EG382639	BC023876	predicted gene EG382639	1456846_at	382639	0	2.2585	6798278	0.00412185	1.51
Egfl7	NM_178444	EGF-like domain 7	1421335_a_at	353156	0	-4.79386	6875803	0.00318195	-1.71
Egflam	NM_178748	EGF-like fibronectin type III and laminin G domains	1434647_at	268780	0	-2.70563	6833788	0.00977056	-1.71
Egfr	NM_207655	epidermal growth factor receptor	1424932_at	13649	0	-3.45066	6778972	0.000114442	-1.41
Egr1	NM_007913	early growth response 1	1417065_at	13653	0.0001	5.4329	6859972	0.000125709	2.91
Ehd1	NM_010119	EH-domain containing 1	1416012_at	13660	0	-3.18167	6867849	0.000428782	-1.51
Ehd3	NM_020578	EH-domain containing 3	1417235_at	57440	0.0001	-2.10793	6852181	0.00106446	-1.41
Ehd4	NM_133838	EH-domain containing 4	1449852_a_at	98878	0	-2.16497	6890288	0.0112331	-1.71
Ehf	NM_007914	ets homologous factor	1451375_at	13661	0.0002	3.5821	6889273	2.34813e-05	2.11
Eif1ay	NM_025437	eukaryotic translation initiation factor 1A Y-linked	1437071_at	66235	0.0002	-2.29568	7021573	0.00957584	-1.21
Eif4e3	NM_025829	eukaryotic translation initiation factor 4E member 3	1417977_at	66892	0.0003	-2.10305	6955935	0.00397356	-1.31
Elf3	NM_007921	E74-like factor 3	1416916_at	13710	0	2.3581	6762411	0.00325799	2.01
Elf5	NM_010125	E74-like factor 5	1419555_at	13711	0	6.017	6879610	0.00060476	2.01
Eln	NM_007925	elastin	1420855_at	13717	0	4.9744	6942380	0.000276465	2.21
Elovl7	NM_029001	ELOVL family member 7 elongation of long chain fatty acids (yeast)	1440312_at	74559	0.0001	2.6656	6810063	0.00134472	2.21
Eltd1	NM_133222	EGF latrophilin seven transmembrane domain containing 1	1418059_at	170757	0	-4.54545	6902440	0.00215221	-3.01
Emcn	NM_016885	endomucin	1425582_a_at	59308	0.0046	-2.5113	6901671	0.00253787	-2.11
Emid1	NM_080595	EMI domain containing 1	1449581_at	140703	0.0032	-2.65604	6785698	0.0262197	-1.21
Eml1	NM_001043336	echinoderm microtubule associated protein like 1	1428321_at	68519	0	-3.9093	6797898	0.0029077	-1.41
Eml2	AK200420	echinoderm microtubule associated protein like 2	1428173_at	72205	0	2.8147	6958993	0.000791311	1.81
Emr4	NM_139138	EGF-like module containing mucin-like hormone receptor-like sequence 4	1451563_at	52614	0	-7.29395	6851186	0.00138159	-2.11
Enc1	NM_007930	ectodermal-neural cortex 1	1450061_at	13803	0	2.9146	6809272	0.00484647	2.21
Eng	NM_007932	endoglin	1432176_a_at	13805	0.0005	-4.4964	6876212	0.000697076	-2.41
Epb4.1l2	BC055044	erythrocyte protein band 4.1-like 2	1433490_s_at	13822	0	-2.44021	6766705	0.0203272	-1.31
Epb4.1l3	NM_013813	erythrocyte protein band 4.1-like 3	1419062_at	13823	0.0006	-4.38596	6851897	0.00119394	-1.61
Epb4.9	NM_013514	erythrocyte protein band 4.9	1460223_a_at	13829	0	-2.65322	6825713	0.00526025	-1.31
Epha2	NM_010139	Eph receptor A2	1421151_a_at	13836	0.0001	2.2686	6918158	0.000333279	1.71
Epha7	NM_010141	Eph receptor A7	1451991_at	13841	0.0002	2.7427	6912371	2.30883e-06	2.01
Ephb4	NM_010144	Eph receptor B4	1449845_a_at	13846	0	-2.43724	6935064	0.00104332	-1.51
Epn2	NM_010148	epsin 2	1447599_x_at	13855	0.0001	-2.67666	6788851	0.0440159	-1.21
Eps8	NM_007945	epidermal growth factor receptor pathway substrate 8	1422823_at	13860	0.0003	-2.55297	6957789	0.000620862	-1.11
Erbb2	NM_001003817	v-erb-b2 erythroblastic leukemia viral oncogene homolog 2 neuro/glioblastoma derived oncogene homolog (avian)	1424919_at	13866	0	2.8606	6784005	0.000356282	1.51
Erbb3	NM_010153	v-erb-b2 erythroblastic leukemia viral oncogene homolog 3 (avian)	1434606_at	13867	0	2.8884	6778044	0.000107046	2.31
Ereg	NM_007950	epiregulin	1419431_at	13874	0.0002	482.203	6932387	5.50274e-05	9.31
Erg	NM_133659	avian erythroblastosis virus E-26 (v-ets) oncogene related	1440244_at	13876	0	-3.85802	6848127	0.00778141	-1.71
Ets1	X55787	E26 avian leukemia oncogene 1 5' domain	1452163_at	23871	0	-2.80426	6987954	0.0197127	-1.71
Ets2	NM_011809	E26 avian leukemia oncogene 2 3' domain	1447685_x_at	23872	0.0009	-2.19443	6843433	0.000739069	-1.81
Evc	NM_021292	Ellis van Creveld gene homolog (human)	1448876_at	59056	0.0005	-2.45158	6937542	0.00208412	-1.51
Evc2	NM_145920	Ellis van Creveld syndrome 2 homolog (human)	1429447_at	68525	0.0012	-2.99133	6930023	0.000967945	-1.41
Exoc3l	NM_177788	exocyst complex component 3-like	1436536_at	277978	0	-2.73598	6984958	0.0185896	-1.61
Eya1	NM_010164	eyes absent 1 homolog (Drosophila)	1457424_at	14048	0.0142	-2.15146	6757035	0.0280011	1.11
Eya2	NM_010165	eyes absent 2 homolog (Drosophila)	1424127_at	14049	0	2.4752	6883186	0.000185151	1.61
F13a1	NM_028784	coagulation factor XIII A1 subunit	1448929_at	74145	0.0005	-3.51	6812386	0.0158821	-1.51
F5	NM_007976	coagulation factor V	1418907_at	14067	0.0004	-4.37063	6754691	0.00387193	-1.31
F730031O20Rik	NM_001080820	RIKEN cDNA F730031O20 gene	1444426_at	320664	0.0002	-4.84262	6883604	0.00683971	-1.51
Fabp3	NM_010174	fatty acid binding protein 3 muscle and heart	1416023_at	14077	0.0001	-3.28084	6917374	0.000540154	-1.61
Faim2	NM_028224	Fas apoptotic inhibitory molecule 2	1429518_at	72393	0.0001	-4.81928	6838460	0.000101696	-2.21
Fat1	NM_001081286	FAT tumor suppressor homolog 1 (Drosophila)	1433857_at	14107	0	2.59	6975850	7.89554e-07	1.91
Fat3	NM_001080814	FAT tumor suppressor homolog 3 (Drosophila)	1457589_at	270120	0.0033	-3.36361	6993501	0.000549576	-1.41
Fat4	NM_183221	FAT tumor suppressor homolog 4 (Drosophila)	1459749_s_at	329628	0.0009	-4.34028	6896914	0.0153308	-1.41
Fbln5	NM_011812	fibulin 5	1416164_at	23876	0	-2.35849	6803133	0.00141912	-1.61
Fbxo30	NM_027968	F-box protein 30	1453136_at	71865	0.0004	-3.52734	6765973	0.000153439	-1.81
Fbxo39	NM_001037713	F-box protein 39	1443698_at	327959	0	-2.04834	6782235	5.76814e-05	-1.81
Fetub	NM_021564	fetuin beta	1449555_a_at	59083	0	56.1463	6840094	2.22855e-05	8.91
Fez2	NM_199448	fasciculation and elongation protein zeta 2 (zygin II)	1434348_at	225020	0.0001	-2.51889	6857415	5.55411e-05	-1.71
Fgd5	NM_172731	FYVE RhoGEF and PH domain containing 5	1460578_at	232237	0.0004	-3.65898	6948034	0.0131393	-1.51
Fgf7	NM_008008	fibroblast growth factor 7	1438405_at	14178	0.0002	-4.68165	6880900	0.000675753	-1.91
Fgfr2	NM_010207	fibroblast growth factor receptor 2	1420847_a_at	14183	0.0014	2.5715	6971490	0.000376479	1.51
Fgfr4	NM_008011	fibroblast growth factor receptor 4	1418596_at	14186	0	-9.46074	6807214	0.000163231	-2.41
Fgg	NM_133862	fibrinogen gamma polypeptide	1416025_at	99571	0.0014	5.9679	6898771	3.90428e-05	4.41
Fhl1	NM_001077362	four and a half LIM domains 1	1417872_at	14199	0	-2.46914	7011394	0.00467288	-1.71
Figf	NM_010216	c-fos induced growth factor	1438954_x_at	14205	0.0001	-7.12251	7015007	0.00152123	-2.51
Fkbp4	NM_010219	FK506 binding protein 4	1416362_a_at	14228	0.0002	2.8985	6957346	0.00837021	1.71
Fkbp7	NM_010222	FK506 binding protein 7	1416803_at	14231	0	-2.28519	6888003	1.89227e-05	-1.71
Fli1	NM_008026	Friend leukemia integration 1	1433512_at	14247	0	-2.77239	6994431	0.0223698	-1.31
Flrt3	NM_178382	fibronectin leucine rich transmembrane protein 3	1429310_at	71436	0.0001	-2.61643	6891493	0.0186122	-1.51
Flt4	NM_008029	FMS-like tyrosine kinase 4	1421442_at	14257	0	-2.88767	6780746	0.00335636	-1.61
Fmo1	NM_010231	flavin containing monooxygenase 1	1417429_at	14261	0.0008	-4.9975	6763623	0.0099483	-2.71
Fmo2	NM_018881	flavin containing monooxygenase 2	1453435_a_at	55990	0.003	-4.00962	6763626	0.00032564	-2.01
Fmo5	NM_010232	flavin containing monooxygenase 5	1450332_s_at	14263	0	-3.82995	6899835	0.00164302	-1.81
Fos	NM_010234	FBJ osteosarcoma oncogene	1423100_at	14281	0.0006	2.9164	6796691	0.000125615	1.81
Foxf1a	NM_010426	forkhead box F1a	1434939_at	15227	0	-3.97456	6979570	0.000151112	-3.01
Foxf2	NM_010225	forkhead box F2	1418220_at	14238	0.0001	-2.8547	6805887	0.00581133	-1.81
Foxp2	NM_053242	forkhead box P2	1458191_at	114142	0.0047	3.1279	6944262	1.29773e-09	2.11
Foxq1	NM_008239	forkhead box Q1	1422735_at	15220	0	3.7384	6805878	0.00266556	2.71
Frem1	NM_177863	Fras1 related extracellular matrix protein 1	1455280_at	329872	0.0002	-2.76472	6922890	0.0386513	-1.31
Frk	NM_010237	fyn-related kinase	1436413_at	14302	0	3.3886	6767094	5.20014e-06	1.81
Fst	NM_008046	follistatin	1434458_at	14313	0	4.5824	6816226	0.00839086	1.61
Fxyd1	NM_194321	FXYD domain-containing ion transport regulator 1	1421374_a_at	56188	0.0001	-4.13565	6966339	0.00455215	-1.41
Fyn	NM_008054	Fyn proto-oncogene	1448765_at	14360	0.0005	-2.7894	6767258	0.00614484	-1.41
Fzd4	NM_008055	frizzled homolog 4 (Drosophila)	1419301_at	14366	0.0014	-2.31481	6962444	0.000259127	-2.01
Gab3	NM_181584	growth factor receptor bound protein 2-associated protein 3	1426589_at	210710	0.0007	-2.60417	7017663	0.00379459	-1.41
Gabpb1	AK139710	GA repeat binding protein beta 1	1419761_a_at	14391	0.0001	2.5212	6890638	0.0142124	1.21
Gadd45b	NM_008655	growth arrest and DNA-damage-inducible 45 beta	1450971_at	17873	0.0021	-2.03252	6769255	0.0055844	-1.21
Galc	NM_008079	galactosylceramidase	1452907_at	14420	0	2.445	6802989	0.000338986	1.61
Galnt3	NM_015736	UDP-N-acetyl-alpha-D-galactosamine:polypeptide N-acetylgalactosaminyltransferase 3	1417588_at	14425	0	2.8862	6887337	0.000298318	2.11
Galntl2	NM_030166	UDP-N-acetyl-alpha-D-galactosamine:polypeptide N-acetylgalactosaminyltransferase-like 2	1429236_at	78754	0.0006	-2.37304	6818051	0.000904767	-1.51
Galntl4	NM_173739	UDP-N-acetyl-alpha-D-galactosamine:polypeptide N-acetylgalactosaminyltransferase-like 4	1454780_at	233733	0	-2.77469	6970484	0.00893084	-1.41
Gap43	NM_008083	growth associated protein 43	1423537_at	14432	0.0014	-5.73394	6845800	0.000986398	-2.01
Gas2l3	NM_001033331	growth arrest-specific 2 like 3	1453416_at	237436	0.0005	2.4183	6775885	0.000393235	1.41
Gata2	NM_008090	GATA binding protein 2	1428816_a_at	14461	0	-4.91642	6947763	0.000396311	-2.31
Gata3	NM_008091	GATA binding protein 3	1448886_at	14462	0.0026	-4.50248	6884642	0.00682369	-1.51
Gata5	NM_008093	GATA binding protein 5	1450125_at	14464	0.0002	-3.38409	6894187	0.00679334	-1.31
Gbp2	NM_010260	guanylate nucleotide binding protein 2	1418240_at	14469	0.0001	-3.39098	6901957	0.000302911	-1.91
Gbp3	NM_018734	guanylate nucleotide binding protein 3	1418392_a_at	55932	0	-3.76932	6901953	0.000159413	-2.11
Gbp6	NM_145545	guanylate binding protein 6	1434380_at	229900	0.0001	-4.20521	6901950	0.00047923	-2.01
Gch1	NM_008102	GTP cyclohydrolase 1	1429692_s_at	14528	0	2.6887	6824321	0.00209823	1.51
Gclc	NM_010295	glutamate-cysteine ligase catalytic subunit	1424296_at	14629	0.0171	3.2021	6990664	1.23367e-05	2.61
Gcnt1	NM_173442	glucosaminyl (N-acetyl) transferase 1 core 2	1460431_at	14537	0	5.5185	6871874	0.0165725	1.81
Gdnf	NM_010275	glial cell line derived neurotrophic factor	1419080_at	14573	0.0001	2.8678	6828547	0.0019704	1.61
Gfod1	NM_001033399	glucose-fructose oxidoreductase domain containing 1	1455599_at	328232	0	-3.04507	6812773	0.00259308	-1.21
Gfpt1	NM_013528	glutamine fructose-6-phosphate transaminase 1	1449268_at	14583	0	2.2047	6947679	1.39246e-05	1.61
Gfra2	NM_008115	glial cell line derived neurotrophic factor family receptor alpha 2	1459847_x_at	14586	0.0001	-4.45831	6820113	0.00325005	-1.61
Ggh	NM_010281	gamma-glutamyl hydrolase	1419595_a_at	14590	0	-2.34742	6912042	2.79243e-06	-2.01
Ggta1	NM_010283	glycoprotein galactosyltransferase alpha 1 3	1418483_a_at	14594	0.0001	-2.91545	6886045	0.0102867	-1.61
Ghr	NM_010284	growth hormone receptor	1451501_a_at	14600	0.0002	-3.26477	6833531	0.0100342	-1.81
Gimap1	NM_008376	GTPase IMAP family member 1	1449988_at	16205	0.0001	-3.61272	6946033	0.00596272	-1.61
Gimap4	NM_174990	GTPase IMAP family member 4	1424374_at	107526	0.0001	-3.19489	6946028	0.00629985	-1.91
Gimap5	NM_175035	GTPase IMAP family member 5	1444181_at	317757	0.0166	-3.4118	6946034	0.0173526	-1.71
Gimap6	NM_153175	GTPase IMAP family member 6	1427891_at	231931	0.0003	-3.52734	6953415	0.0325227	-2.71
Gimap8	NM_212486	GTPase IMAP family member 8	1456061_at	243374	0.0001	-3.13972	6946021	0.0177752	-2.01
Gimap9	NM_174960	GTPase IMAP family member 9	1437756_at	317758	0.003	-2.25023	6946026	0.000856254	-1.71
Git2	NM_001077360	G protein-coupled receptor kinase-interactor 2	1435925_at	26431	0	-2.05804	6941217	0.0249132	-1.51
Gja1	NM_010288	gap junction membrane channel protein alpha 1	1415800_at	14609	0	2.3697	6768014	5.18052e-06	1.31
Gja5	NM_008121	gap junction membrane channel protein alpha 5	1429101_at	14613	0.0029	-6.34921	6899791	0.000801774	-1.91
Gja7	NM_008122	gap junction membrane channel protein alpha 7	1447787_x_at	14615	0.0768	-4.43262	6791637	9.05504e-05	-1.71
Gjb2	NM_008125	gap junction membrane channel protein beta 2	1423271_at	14619	0	5.6526	6824932	3.44102e-05	1.81
Gjb4	NM_008127	gap junction membrane channel protein beta 4	1422179_at	14621	0	35.3689	6925434	0.000257038	2.61
Gjb6	NM_001010937	gap junction membrane channel protein beta 6	1448397_at	14623	0	4.6952	6824940	2.47905e-05	1.41
Glb1l3	XM_981033	galactosidase beta 1 like 3	1453143_at	70893	0.0039	-6.23441	6994135	0.000128017	-2.01
Glis2	NM_031184	GLIS family zinc finger 2	1416598_at	83396	0	-2.1631	6839052	0.0021439	-1.51
Glrx	NM_053108	glutaredoxin	1416592_at	93692	0	4.9436	6808314	0.000202126	2.21
Glt8d2	AK086276	glycosyltransferase 8 domain containing 2	1429402_at	74782	0.0018	-2.45821	6775518	0.0190235	-1.51
Gm166	BC066021	gene model 166 (NCBI)	1434634_at	233899	0.0001	2.4787	6971387	0.0124885	1.41
Gm1752	XM_001001634	gene model 1752 (NCBI)	1436941_at	385658	0.0001	-4.46429	6846376	5.36019e-05	-2.41
Gm71	NM_001033236	gene model 71 (NCBI)	1455726_at	207965	0	6.548	6801485	3.38756e-05	2.11
Gm944	NM_001033445	gene model 944 (NCBI)	1436827_at	381126	0.0007	3.0293	6863799	5.65204e-07	1.71
Gm98	AK141695	gene model 98 (NCBI)	1439506_at	225908	0.0004	-4.91159	6871478	0.000839789	-1.71
Gmfg	NM_001039192	glia maturation factor gamma	1419193_a_at	63986	0	-2.33809	6959421	1.80334e-06	-1.71
Gna14	NM_008137	guanine nucleotide binding protein alpha 14	1420385_at	14675	0	-3.11818	6868371	0.00221025	-1.71
Gnao1	NM_010308	guanine nucleotide binding protein alpha o	1421152_a_at	14681	0.0082	-2.63505	6978263	0.00237983	-1.61
Gng2	NM_010315	guanine nucleotide binding protein (G protein) gamma 2 subunit	1428156_at	14702	0	-3.71609	6823007	0.010004	-1.11
Gnpat	NM_010322	glyceronephosphate O-acyltransferase	1417456_at	14712	0.0003	2.2542	6979836	2.67191e-05	1.51
Gnptab	NM_001004164	N-acetylglucosamine-1-phosphate transferase alpha and beta subunits	1435335_a_at	432486	0.0001	2.7216	6769634	4.22456e-07	1.81
Gpc3	NM_016697	glypican 3	1450990_at	14734	0.0001	-4.42282	7016826	0.000426453	-2.11
Gpc6	NM_011821	glypican 6	1437417_s_at	23888	0.004	10.569	6821985	0.00404102	1.81
Gpd1	NM_010271	glycerol-3-phosphate dehydrogenase 1 (soluble)	1416204_at	14555	0.0015	2.9789	6833185	0.000190594	2.21
Gpihbp1	NM_026730	GPI-anchored HDL-binding protein 1	1453022_at	68453	0.0001	-3.61925	6831591	4.5074e-05	-1.81
Gpm6a	NM_153581	glycoprotein m6a	1456741_s_at	234267	0.0001	-8.38926	6976214	0.00170754	-2.11
Gpm6b	NM_023122	glycoprotein m6b	1423091_a_at	14758	0	-4.1806	7015061	0.00107462	-1.91
Gpr116	XM_923529	G protein-coupled receptor 116	1440225_at	224792	0	-3.93546	6850508	0.00729954	-1.71
Gpr120	NM_181748	G protein-coupled receptor 120	1439489_at	107221	0	3.7045	6869543	0.00925041	2.81
Gpr124	NM_054044	G protein-coupled receptor 124	1418379_s_at	78560	0	-3.03859	6974832	2.74018e-05	-1.81
Gpr125	XM_991709	G protein-coupled receptor 125	1426782_at	70693	0.0002	-2.28885	6938007	0.00016736	-1.71
Gpr126	NM_001002268	G protein-coupled receptor 126	1437408_at	215798	0	-4.32526	6772255	0.0112436	-1.71
Gpr160	AK158013	G protein-coupled receptor 160	1453072_at	71862	0.0004	2.2371	6896514	0.0159143	1.41
Gpr56	NM_018882	G protein-coupled receptor 56	1433485_x_at	14766	0	3.3507	6978354	4.25971e-06	2.41
Gpt2	NM_173866	glutamic pyruvate transaminase (alanine aminotransferase) 2	1455007_s_at	108682	0	2.3736	6977814	0.011233	1.41
Grap	NM_027817	GRB2-related adaptor protein	1429387_at	71520	0	-3.46021	6781525	0.00012293	-2.21
Grb10	NM_010345	growth factor receptor bound protein 10	1425458_a_at	14783	0	-2.02634	6786046	0.00639684	-1.41
Grb7	NM_010346	growth factor receptor bound protein 7	1448227_at	14786	0.0001	3.9324	6784008	1.26558e-05	2.11
Grhl2	NM_026496	grainyhead-like 2 (Drosophila)	1427046_at	252973	0.0001	3.0699	6829871	2.70536e-05	1.91
Gria1	NM_008165	glutamate receptor ionotropic AMPA1 (alpha 1)	1435239_at	14799	0.0112	-6.84463	6781201	0.00357831	-1.61
Gria3	NM_016886	glutamate receptor ionotropic AMPA3 (alpha 3)	1434728_at	53623	0.0005	-3.8506	7010835	0.00182703	-1.51
Grtp1	NM_025768	GH regulated TBC protein 1	1439150_x_at	66790	0.0013	-5.86166	6980526	0.00121077	-2.11
Gsta4	NM_010357	glutathione S-transferase alpha 4	1416368_at	14860	0	7.1987	6990685	0.0116623	2.51
Gstm1	NM_010358	glutathione S-transferase mu 1	1425627_x_at	14862	0	-3.13381	6908078	0.000501893	-1.81
Gstm2	NM_008183	glutathione S-transferase mu 2	1416411_at	14863	0	-4.12201	6908079	0.00122378	-1.61
Gstm5	NM_010360	glutathione S-transferase mu 5	1416842_at	14866	0.0001	-2.1978	6900348	0.000742859	-1.51
Gstm7	NM_026672	glutathione S-transferase mu 7	1419072_at	68312	0	-3.54736	6908073	0.022643	-1.21
Gucy1a3	NM_021896	guanylate cyclase 1 soluble alpha 3	1420534_at	60596	0	-3.40368	6906328	0.00364226	-1.71
Gucy1b3	NM_017469	guanylate cyclase 1 soluble beta 3	1420871_at	54195	0.0013	-4.00802	6906325	0.0014329	-2.11
Gulp1	NM_027506	GULP engulfment adaptor PTB domain containing 1	1434423_at	70676	0.0003	-4.914	6749115	0.000208971	-2.01
Gvin1	NM_029000	GTPase very large interferon inducible 1	1429184_at	74558	0	-4.56621	6970164	0.00216335	-1.81
Gyg	NM_013755	glycogenin	1448429_at	27357	0	-3.27547	6903549	0.0416049	-1.31
Gyk	NM_008194	glycerol kinase	1422703_at	14933	0.0004	3.7959	7018041	1.45351e-05	1.51
Gyltl1b	NM_172670	glycosyltransferase-like 1B	1434007_at	228366	0.0001	2.8299	6888830	1.82473e-05	1.51
Gypc	NM_001048207	glycophorin C	1423878_at	71683	0	-3.07503	6864404	0.000147276	-1.81
Gzma	NM_010370	granzyme A	1417898_a_at	14938	0	-3.79363	6816160	0.00261014	-2.21
H13	NM_010376	histocompatibility 13	1417287_at	14950	0.0001	2.2153	6882305	0.0036161	1.11
H2afy2	NM_207000	H2A histone family member Y2	1426363_x_at	404634	0.0001	-2.45218	6774368	0.00488178	-1.51
H2-Q10	NM_010391	histocompatibility 2 Q region locus 10	1425137_a_at	15007	0.0001	-3.8373	6850149	0.0188434	-1.21
Hba-a1	NM_008218	hemoglobin alpha adult chain 1	1417714_x_at	15122	0.0001	-4.47227	6779840	6.83359e-06	-1.71
Hbegf	NM_010415	heparin-binding EGF-like growth factor	1418349_at	15200	0.0001	2.4016	6864680	0.000393373	2.11
Hdac6	NM_010413	histone deacetylase 6	1448928_at	15185	0	2.2529	7015425	7.02224e-05	1.21
Hdc	NM_008230	histidine decarboxylase	1454713_s_at	15186	0	5.0709	6890636	2.84453e-07	4.01
Hdgfrp3	NM_013886	hepatoma-derived growth factor related protein 3	1435977_at	29877	0	-4.42478	6968871	0.00611142	-1.51
Hecw1	AK086170	HECT C2 and WW domain containing E3 ubiquitin protein ligase 1	1456527_at	94253	0.0001	9.6776	6811136	2.97005e-06	2.61
Hecw2	NM_001001883	HECT C2 and WW domain containing E3 ubiquitin protein ligase 2	1458464_at	329152	0.0313	-3.86399	6758694	0.000319759	-2.21
Heg1	NM_175256	HEG homolog 1 (zebrafish)	1439926_at	77446	0.0283	-4.43656	6840631	0.00507472	-1.71
Heph	NM_010417	hephaestin	1448696_at	15203	0	-3.83877	7012696	0.00126354	-1.41
Hey1	NM_010423	hairy/enhancer-of-split related with YRPW motif 1	1415999_at	15213	0.0009	-4.06835	6903088	0.0120296	-1.81
Hgfac	NM_019447	hepatocyte growth factor activator	1418405_at	54426	0	7.653	6929865	6.03494e-05	2.31
Hhex	NM_008245	hematopoietically expressed homeobox	1423319_at	15242	0	3.0144	6869509	0.00187902	1.91
Hhip	NM_020259	Hedgehog-interacting protein	1455277_at	15245	0.0008	-2.78009	6983639	0.031263	-1.31
Higd1b	NM_080846	HIG1 domain family member 1B	1449860_at	75689	0	-3.42466	6784368	0.00760553	-1.91
Hip1	NM_146001	huntingtin interacting protein 1	1434557_at	215114	0	-2.35018	6942441	0.00744211	-1.51
Hivep3	NM_010657	human immunodeficiency virus type I enhancer binding protein 3	1458802_at	16656	0.0005	-2.34962	6916775	0.0170814	-1.11
Hk2	NM_013820	hexokinase 2	1422612_at	15277	0.0003	2.6746	6954982	0.00996603	1.71
Hkdc1	NM_145419	hexokinase domain containing 1	1425900_at	216019	0.0014	2.4341	6774392	0.000114687	1.61
Hlf	NM_172563	hepatic leukemia factor	1434736_at	217082	0.0143	-4.73485	6790699	0.00201379	-2.61
Hmbox1	NM_177338	homeobox containing 1	1436341_at	219150	0.0001	-2.20702	6825390	0.0219671	-1.61
Hmbs	NM_013551	hydroxymethylbilane synthase	1426475_at	15288	0	2.211	6995074	0.000358215	1.51
Hmcn1	BC016539	hemicentin 1	1438532_at	545370	0.0003	-4.78927	6762974	0.0165401	-1.91
Hmgb3	NM_008253	high mobility group box 3	1416155_at	15354	0	3.1787	7011852	3.59617e-06	1.71
Hmox1	NM_010442	heme oxygenase (decycling) 1	1448239_at	15368	0	3.2732	6977260	0.000151038	2.01
Hn1l	NM_198937	hematological and neurological expressed 1-like	1433696_at	52009	0	3.4878	6854401	2.92513e-05	2.11
Hnmt	NM_080462	histamine N-methyltransferase	1417702_a_at	140483	0	2.8966	6885325	0.0101675	1.51
Hook1	NM_030014	hook homolog 1 (Drosophila)	1438018_at	77963	0	3.1654	6915567	8.65578e-06	1.81
Hook2	NM_133255	hook homolog 2 (Drosophila)	1419350_at	170833	0	3.8158	6977779	1.77075e-05	1.31
Hpgd	NM_008278	hydroxyprostaglandin dehydrogenase 15 (NAD)	1419906_at	15446	0.0005	-5.3135	6976237	0.00429968	-2.11
Hpn	NM_008281	hepsin	1420712_a_at	15451	0	8.6959	6966354	1.56728e-05	2.21
Hsd11b1	NM_001044751	hydroxysteroid 11-beta dehydrogenase 1	1449038_at	15483	0	-2.87026	6765325	0.0024319	-1.91
Hsd17b10	NM_016763	hydroxysteroid (17-beta) dehydrogenase 10	1438391_x_at	15108	0.0001	2.6881	7014557	0.00741577	1.41
Hspa12b	NM_028306	heat shock protein 12B	1460371_at	72630	0	-3.92465	6881237	0.000361237	-1.71
Hyal1	NM_008317	hyaluronoglucosaminidase 1	1449954_at	15586	0.0077	-3.43643	6992224	0.000179095	-2.51
Hyal2	NM_010489	hyaluronoglucosaminidase 2	1448679_at	15587	0	-2.61233	6992221	1.37556e-05	-1.71
Icam2	NM_010494	intercellular adhesion molecule 2	1448862_at	15896	0.0003	-4.31779	6791918	0.00478753	-1.71
Ick	NM_019987	intestinal cell kinase	1455687_at	56542	0.0002	2.2802	6990683	0.00170215	1.21
Id2	NM_010496	inhibitor of DNA binding 2	1422537_a_at	15902	0.0001	3.1584	6799462	0.0231067	1.41
Id3	NM_008321	inhibitor of DNA binding 3	1416630_at	15903	0.0002	-2.14087	6917809	1.14842e-05	-2.21
Ifi203	NM_008328	interferon activated gene 203	1426906_at	15950	0.0004	-3.82263	6764274	0.0285588	-1.71
Ifi204	NM_008329	interferon activated gene 204	1452348_s_at	381308	0.0031	-2.72851	6764246	0.0198217	-1.41
Ifi205	NM_172648	interferon activated gene 205	1452348_s_at	381308	0.0031	-2.72851	6764243	0.0383753	1.31
Ifi44	NM_133871	interferon-induced protein 44	1423555_a_at	99899	0.0002	-3.85208	6910592	0.00441907	-1.61
Ifit2	NM_008332	interferon-induced protein with tetratricopeptide repeats 2	1418293_at	15958	0	-2.40096	6869324	0.000683135	-1.81
Ifnar2	NM_010509	interferon (alpha and beta) receptor 2	1440169_x_at	15976	0.0017	-2.25023	6843177	0.013492	-1.41
Ift80	NM_026641	intraflagellar transport 80 homolog (Chlamydomonas)	1427568_a_at	68259	0	2.7234	6905818	7.05924e-08	1.81
Igf2	NM_010514	insulin-like growth factor 2	1448152_at	16002	0	-2.91036	6972317	1.82806e-05	-1.51
Igfbp2	NM_008342	insulin-like growth factor binding protein 2	1454159_a_at	16008	0.0001	-8.06452	6750440	0.000422569	-2.71
Igfbp3	NM_008343	insulin-like growth factor binding protein 3	1423062_at	16009	0.0001	-11.7925	6785865	6.3609e-06	-2.71
Igfbp4	NM_010517	insulin-like growth factor binding protein 4	1421992_a_at	16010	0.0016	-2.83688	6784062	0.00693426	-1.91
Igfbp5	NM_010518	insulin-like growth factor binding protein 5	1452114_s_at	16011	0.0051	-2.88268	6759664	0.000709846	-1.31
Igfbp6	NM_008344	insulin-like growth factor binding protein 6	1417933_at	16012	0.0001	-4.17014	6833393	8.60991e-06	-2.31
Igsf3	NM_207205	immunoglobulin superfamily member 3	1455048_at	78908	0	2.7256	6900014	0.000770976	1.51
Igsf9	NM_033608	immunoglobulin superfamily member 9	1420518_a_at	93842	0.0007	2.3142	6755241	0.0220446	1.21
Igtp	NM_018738	interferon gamma induced GTPase	1417141_at	16145	0	-2.02922	6781248	0.00118326	-1.81
Il11ra2	NM_010550	interleukin 11 receptor alpha chain 2	1417505_s_at	16157	0.0001	-2.05888	7008145	0.00013427	-1.51
Il17rd	NM_134437	interleukin 17 receptor D	1429893_at	171463	0	-3.93546	6817694	0.00033593	-1.71
Il18rap	NM_010553	interleukin 18 receptor accessory protein	1456545_at	16174	0	3.6827	6748893	4.01016e-08	2.41
Il2rg	NM_013563	interleukin 2 receptor gamma chain	1416296_at	16186	0	-2.12721	7018531	0.00435752	-1.81
Il6st	NM_010560	interleukin 6 signal transducer	1460295_s_at	16195	0.0143	-3.02024	6810260	0.00438909	-1.21
Impdh1	NM_011829	inosine 5'-phosphate dehydrogenase 1	1423239_at	23917	0	-3.67512	6952340	0.000368577	-2.21
Indo	NM_008324	indoleamine-pyrrole 2 3 dioxygenase	1420437_at	15930	0.0013	-5.37057	6981099	8.09655e-05	-1.91
Inpp5a	NM_183144	inositol polyphosphate-5-phosphatase A	1433605_at	212111	0	-2.1815	6965045	0.0108309	-1.31
Iqgap2	AK042038	IQ motif containing GTPase activating protein 2	1433885_at	544963	0.0007	2.2731	6815272	0.00352931	1.31
Iqgap3	NM_001033484	IQ motif containing GTPase activating protein 3	1434850_at	404710	0.0001	2.5439	6899053	7.2557e-05	2.01
Iqsec2	NM_001005475	IQ motif and Sec7 domain 2	1448063_at	245666	0.0003	-2.17581	7014560	0.00812348	-1.31
Irf7	AK158378	interferon regulatory factor 7	1417244_a_at	54123	0	-2.22519	6972192	0.00800346	-1.31
Isyna1	NM_023627	myo-inositol 1-phosphate synthase A1	1415977_at	71780	0	2.5576	6977016	0.00101634	1.71
Itga1	NM_001033228	integrin alpha 1	1439713_at	109700	0.0298	-6.28931	6816248	0.00417502	-1.91
Itga2b	NM_010575	integrin alpha 2b	1417758_at	16399	0.0003	-2.38607	6791570	0.0193785	-1.41
Itga4	X53177	integrin alpha 4	1436037_at	16401	0.0003	-2.74499	6878448	0.00251766	-1.91
Itga5	NM_010577	integrin alpha 5 (fibronectin receptor alpha)	1423267_s_at	16402	0.0005	-2.41488	6838809	0.000320565	-1.51
Itga7	NM_008398	integrin alpha 7	1418393_a_at	16404	0.0004	3.0526	6771718	5.58549e-07	2.51
Itga8	NM_001001309	integrin alpha 8	1427489_at	241226	0	-10.4932	6884750	0.000705319	-2.21
Itga9	NM_133721	integrin alpha 9	1450029_s_at	104099	0	2.4263	6992855	5.64287e-06	1.71
Itgae	NM_172944	integrin alpha E epithelial-associated	1447541_s_at	16407	0.0002	2.9029	6782286	0.00208456	1.51
Itgb3	NM_016780	integrin beta 3	1455257_at	16416	0	-2.87604	6784527	0.000427636	-1.61
Itih2	NM_010582	inter-alpha trypsin inhibitor heavy chain 2	1417618_at	16425	0	45.7542	6884646	1.91313e-05	3.91
Itih5	NM_172471	inter-alpha (globulin) inhibitor H5	1429159_at	209378	0.0005	-3.27332	6874947	0.00239768	-1.41
Itpr2	NM_019923	inositol 1 4 5-triphosphate receptor 2	1424834_s_at	16439	0.0001	-3.05904	6958269	0.00844524	-1.61
Itpr3	NM_080553	inositol 1 4 5-triphosphate receptor 3	1417297_at	16440	0	2.2208	6849481	0.000160572	1.31
Jam2	NM_023844	junction adhesion molecule 2	1436568_at	67374	0.0001	-2.25175	6842800	0.00232421	-1.51
Jun	NM_010591	Jun oncogene	1417409_at	16476	0	-2.77316	6923411	0.000557958	-2.21
Junb	NM_008416	Jun-B oncogene	1415899_at	16477	0.0006	2.4404	6983894	0.000538254	1.71
Kcnc3	NM_008422	potassium voltage gated channel Shaw-related subfamily member 3	1421980_at	16504	0.0171	4.2988	6960291	5.33563e-05	1.71
Kcnh1	NM_010600	potassium voltage-gated channel subfamily H (eag-related) member 1	1435994_at	16510	0.0032	-2.89436	6756419	0.00647888	-1.21
Kcnh2	NM_013569	potassium voltage-gated channel subfamily H (eag-related) member 2	1449544_a_at	16511	0.0001	-2.10926	6936719	0.00955614	-1.61
Kcnj15	NM_019664	potassium inwardly-rectifying channel subfamily J member 15	1435354_at	16516	0	2.1285	6843419	0.00324493	1.51
Kcnk1	NM_008430	potassium channel subfamily K member 1	1455896_a_at	16525	0	5.3353	6979914	0.00117743	1.71
Kcnk2	NM_010607	potassium channel subfamily K member 2	1449158_at	16526	0	5.5528	6765129	0.000715807	2.11
Kcnk3	NM_010608	potassium channel subfamily K member 3	1425341_at	16527	0.0029	-2.09776	6929622	0.0239533	-1.21
Kcnq5	NM_023872	potassium voltage-gated channel subfamily Q member 5	1457587_at	226922	0	-4.24268	6757329	0.00520252	-1.41
Kcns3	NM_173417	potassium voltage-gated channel delayed-rectifier subfamily S member 3	1445519_at	238076	0	-3.17058	6798933	0.00303581	-1.71
Kctd1	NM_134112	potassium channel tetramerisation domain containing 1	1425104_at	106931	0	2.2542	6863582	0.00684969	1.51
Kctd20	NM_025888	potassium channel tetramerisation domain containing 20	1416323_at	66989	0.0002	-2.0145	6849581	0.000143591	-1.41
Kdr	NM_010612	kinase insert domain protein receptor	1449379_at	16542	0.0032	-3.79219	6939241	0.00946058	-2.31
Kif11	NM_010615	kinesin family member 11	1435306_a_at	16551	0.0001	3.1935	6869503	1.84546e-05	1.81
Kif20a	NM_009004	kinesin family member 20A	1449207_a_at	19348	0.0001	4.7876	6859953	4.16508e-05	1.91
Kif23	NM_024245	kinesin family member 23	1455990_at	71819	0	4.1424	6996186	1.78837e-06	2.61
Kif26a	XM_138275	kinesin family member 26A	1447933_at	668303	0.0001	-6.30915	6798253	0.00149918	-1.41
Kif2c	NM_134471	kinesin family member 2C	1437611_x_at	73804	0.0028	2.8868	6924834	2.78821e-05	1.61
Kit	NM_021099	kit oncogene	1452514_a_at	16590	0.0006	-2.68097	6931759	0.0108033	-1.91
Kitl	NM_013598	kit ligand	1448117_at	17311	0.0026	-3.68324	6770201	0.00171736	-1.31
Klc1	NM_001025360	kinesin light chain 1	1428881_at	16593	0	-2.12495	6798232	0.0298011	-1.21
Klf12	NM_010636	Kruppel-like factor 12	1455521_at	16597	0	-5.94177	6826975	0.00103875	-1.11
Klf15	NM_023184	Kruppel-like factor 15	1448181_at	66277	0.0121	-2.78164	6947932	0.00321048	-1.51
Klf2	NM_008452	Kruppel-like factor 2 (lung)	1448890_at	16598	0.0009	-3.81098	6977151	0.00103655	-1.81
Klf4	NM_010637	Kruppel-like factor 4 (gut)	1417395_at	16600	0.0072	-4.56621	6921873	0.000396295	-2.51
Klf5	NM_009769	Kruppel-like factor 5	1451021_a_at	12224	0	3.2033	6821304	0.000105551	1.81
Klf6	AY027436	Kruppel-like factor 6	1459718_x_at	23849	0.0289	-2.23464	6804582	0.00585112	-1.21
Klf7	NM_033563	Kruppel-like factor 7 (ubiquitous)	1449439_at	93691	0.0005	-3.05344	6759297	0.0056027	-1.61
Klhl5	NM_175174	kelch-like 5 (Drosophila)	1426530_a_at	71778	0	-2.53936	6931229	0.00209889	-2.21
Klrk1	NM_033078	killer cell lectin-like receptor subfamily K member 1	1450495_a_at	27007	0.0002	-2.22272	6957406	0.0184632	-1.41
Krt18	NM_010664	keratin 18	1448169_at	16668	0	6.5186	6833382	5.81835e-06	2.71
Krt19	NM_008471	keratin 19	1417156_at	16669	0	3.0293	6791406	0.0296447	1.61
Krt23	NM_033373	keratin 23	1418213_at	94179	0	4.1028	6791338	3.24398e-06	2.81
Krt8	NM_031170	keratin 8	1420647_a_at	16691	0	3.1085	6838693	7.82831e-05	2.91
Krt80	NM_028770	keratin 80	1419619_at	74127	0.0005	-2.71444	6838621	0.00010569	-2.01
Lad1	NM_133664	ladinin	1418449_at	16763	0	16.0494	6753400	5.00598e-06	2.21
Lama4	NM_010681	laminin alpha 4	1424807_at	16775	0.0003	-2.60146	6767231	0.000353359	-1.91
Lamb1-1	NM_008482	laminin B1 subunit 1	1424113_at	16777	0.0007	-3.03951	6794202	0.000771369	-1.51
Lap3	NM_024434	leucine aminopeptidase 3	1450860_at	66988	0	2.3388	6930484	0.00220262	1.61
Lass4	NM_026058	longevity assurance homolog 4 (S. cerevisiae)	1417780_at	67260	0	-2.47219	6973757	0.000929858	-1.71
Lats2	NM_015771	large tumor suppressor 2	1439441_x_at	50523	0.0002	-2.97974	6824967	0.00948714	-1.21
Lbh	NM_029999	limb-bud and heart	1429088_at	77889	0	-3.59842	6852144	0.0179823	-1.31
Lcn2	NM_008491	lipocalin 2	1427747_a_at	16819	0	3.2125	6885873	0.000334308	2.01
Ldb2	NM_001077398	LIM domain binding 2	1439557_s_at	16826	0	-2.99222	6937844	0.0203178	-1.51
Ldha	NM_010699	lactate dehydrogenase A	1419737_a_at	16828	0	2.3819	6960498	6.45755e-06	1.61
Lef1	NM_010703	lymphoid enhancer binding factor 1	1454734_at	16842	0	-2.58598	6901380	0.00134824	-1.61
Lepr	NM_010704	leptin receptor	1425644_at	16847	0.0003	-3.64964	6915847	0.000511351	-2.11
Leprel2	NM_013534	leprecan-like 2	1449531_at	14789	0	-2.04834	6957138	0.000780885	-1.31
Lgi3	NM_145219	leucine-rich repeat LGI family member 3	1436238_at	213469	0.0001	2.2359	6820083	4.45241e-05	2.11
Lims2	NM_144862	LIM and senescent cell antigen like domains 2	1424408_at	225341	0.0021	-5.12295	6859790	7.16524e-05	-2.01
Lin52	NM_173756	lin-52 homolog (C. elegans)	1434161_at	217708	0.0007	-2.06271	6796606	0.00577794	-1.31
Lipg	NM_010720	lipase endothelial	1450188_s_at	16891	0	-7.25163	6866693	0.000304002	-2.21
Liph	NM_153404	lipase member H	1456619_at	239759	0	2.6927	6844544	3.87747e-07	2.21
Lmo2	NM_008505	LIM domain only 2	1454086_a_at	16909	0	-3.55114	6879637	0.0246788	-1.71
LOC623121	XM_994228	similar to Interferon-activatable protein 203 (Ifi-203) (Interferon-inducible protein p203)	1437636_at	623121	0	-6.42674	6764233	0.0115666	-1.61
Lphn3	NM_198702	latrophilin 3	1447551_x_at	319387	0.0005	-4.68384	6931961	0.00232904	-2.21
Lrat	NM_023624	lecithin-retinol acyltransferase (phosphatidylcholine-retinol-O-acyltransferase)	1444487_at	79235	0.0009	-10.101	6906381	0.020165	-1.21
Lrg1	NM_029796	leucine-rich alpha-2-glycoprotein 1	1417290_at	76905	0	3.696	6856203	9.75357e-07	2.81
Lrig3	NM_177152	leucine-rich repeats and immunoglobulin-like domains 3	1430554_at	320398	0.0013	-2.151	6771476	0.00878641	-1.31
Lrp2	NM_001081088	low density lipoprotein receptor-related protein 2	1427133_s_at	14725	0	2.7613	6887531	7.70831e-07	2.71
Lrp4	NM_172668	low density lipoprotein receptor-related protein 4	1426288_at	228357	0.0001	-2.13083	6879054	0.00629986	-1.41
Lrrc8c	NM_133897	leucine rich repeat containing 8 family member C	1455398_at	100604	0	2.5396	6933138	0.000830194	1.31
Lsr	NM_017405	lipolysis stimulated lipoprotein receptor	1451255_at	54135	0	2.7891	6966329	0.000797099	1.61
Ltb4dh	NM_025968	leukotriene B4 12-hydroxydehydrogenase	1417777_at	67103	0	10.4917	6922026	0.000355744	4.61
Ltbp1	NM_019919	latent transforming growth factor beta binding protein 1	1448870_at	268977	0	-4.22833	6852229	0.000233443	-1.71
Ltbp4	NM_175641	latent transforming growth factor beta binding protein 4	1436665_a_at	108075	0.0001	-2.85063	6966039	0.00249508	-1.71
Lysmd2	NM_027309	LysM putative peptidoglycan-binding domain containing 2	1428626_at	70082	0	-3.55114	6990564	0.00060381	-2.31
Lyz	NM_013590	lysozyme	1450822_at	17110	0.0047	-2.82566	6777310	0.000261446	-1.81
Lyzs	NM_017372	lysozyme	1450822_at	17110	0.0047	-2.82566	6777309	0.0145551	-1.11
Macf1	AK143540	microtubule-actin crosslinking factor 1	1439582_at	11426	0.0142	-3.46741	6925165	0.0484484	-1.61
Mad2l1	NM_019499	MAD2 (mitotic arrest deficient homolog)-like 1 (yeast)	1422460_at	56150	0	2.9986	6946778	4.84103e-05	1.61
Maf	NM_001025577	avian musculoaponeurotic fibrosarcoma (v-maf) AS42 oncogene homolog	1435828_at	17132	0	-3.91083	6985594	0.00430715	-1.21
Mal	NM_010762	myelin and lymphocyte protein T-cell differentiation protein	1432558_a_at	17153	0	6.7288	6890710	8.74114e-06	3.51
Mall	NM_145532	mal T-cell differentiation protein-like	1435693_at	228576	0.0002	2.8487	6890712	0.00308794	1.41
Malt1	NM_172833	mucosa associated lymphoid tissue lymphoma translocation gene 1	1445068_at	240354	0.0142	4.4113	6861627	2.82556e-05	2.71
Mamdc2	NM_174857	MAM domain containing 2	1453152_at	71738	0.0004	-4.662	6872204	0.0013193	-2.31
Map2k6	NM_011943	mitogen activated protein kinase kinase 6	1426850_a_at	26399	0.0003	-2.27015	6784829	0.00863783	-1.51
Map3k8	NM_007746	mitogen activated protein kinase kinase kinase 8	1419208_at	26410	0.0001	-2.30415	6863048	0.0490047	-1.41
Mapk11	NM_011161	mitogen-activated protein kinase 11	1421926_at	19094	0	4.2752	6837785	0.000969467	1.71
Mapk13	NM_011950	mitogen activated protein kinase 13	1448871_at	26415	0	7.0891	6849571	1.09291e-05	2.71
Mapkapk3	NM_178907	mitogen-activated protein kinase-activated protein kinase 3	1437494_at	102626	0	2.4779	6998606	0.000361245	1.41
Mapt	NM_010838	microtubule-associated protein tau	1424719_a_at	17762	0.0014	-5.98444	6784498	0.00702403	-1.71
March2	BC002144	membrane-associated ring finger (C3HC4) 2	1459871_x_at	224703	0.0004	-3.07882	6854954	0.00476226	-1.31
Marcks	NM_008538	myristoylated alanine rich protein kinase C substrate	1456700_x_at	17118	0	-2.75862	6773286	0.000173117	-1.71
Marco	NM_010766	macrophage receptor with collagenous structure	1449498_at	17167	0.0046	-3.45781	6761701	0.000141495	-1.51
Marveld3	NM_028584	MARVEL (membrane-associating) domain containing 3	1451764_at	73608	0.0003	2.7361	6985288	0.00281061	1.91
Mat1a	NM_133653	methionine adenosyltransferase I alpha	1423147_at	11720	0	5.4215	6818498	0.000774329	1.91
Mbip	NM_145442	MAP3K12 binding inhibitory protein 1	1424405_at	217588	0.0002	2.2508	6800968	0.0107905	1.61
Mbnl3	NM_134163	muscleblind-like 3 (Drosophila)	1422836_at	171170	0	2.2761	7016804	0.000447604	1.61
Mboat1	NM_153546	membrane bound O-acyltransferase domain containing 1	1435323_a_at	218121	0	6.0052	6805794	0.000272469	2.41
Mboat5	NM_145130	membrane bound O-acyltransferase domain containing 5	1423960_at	14792	0.0001	2.1637	6949797	2.53788e-05	1.61
Mcam	NM_023061	melanoma cell adhesion molecule	1416357_a_at	84004	0	-2.2779	6988609	0.000368474	-1.71
Mcc	NM_001033406	mutated in colorectal cancers	1438081_at	328949	0	-6.52742	6865148	0.0253776	-1.71
Mcm5	NM_008566	minichromosome maintenance deficient 5 cell division cycle 46 (S. cerevisiae)	1415945_at	17218	0	2.5776	6977261	0.00762195	1.71
Med12l	AK129412	mediator of RNA polymerase II transcription subunit 12 homolog (yeast)-like	1452864_at	329650	0	4.089	6897819	0.000107247	1.91
Meox2	NM_008584	mesenchyme homeobox 2	1424234_s_at	17286	0.002	-3.01205	6794550	0.0221488	-1.31
Mertk	NM_008587	c-mer proto-oncogene tyrosine kinase	1422869_at	17289	0.0016	-2.41255	6881087	0.0293877	-1.31
Mesdc1	NM_030705	mesoderm development candidate 1	1416397_at	80889	0	-2.10837	6969014	0.000206789	-1.51
Metrnl	NM_144797	meteorin glial cell differentiation regulator-like	1424356_a_at	210029	0	3.1747	6785558	0.0179783	1.31
Mfap2	NM_008546	microfibrillar-associated protein 2	1417359_at	17150	0	-2.22717	6918131	0.000102516	-1.81
Mfap4	NM_029568	microfibrillar-associated protein 4	1424010_at	76293	0.0002	-4.15455	6781515	0.00301317	-1.91
Mfhas1	XM_988067	malignant fibrous histiocytoma amplified sequence 1	1429005_at	52065	0	-2.84091	6975392	0.000509383	-1.51
Mfng	NM_008595	manic fringe homolog (Drosophila)	1416992_at	17305	0	-2.13356	6837045	0.000711321	-1.81
Mgat5	NM_145128	mannoside acetylglucosaminyltransferase 5	1428643_at	107895	0	2.2988	6752848	0.00423383	1.41
Mgll	NM_011844	monoglyceride lipase	1453836_a_at	23945	0.008	-3.99042	6947814	0.00115794	-1.71
Mki67	XM_989664	antigen identified by monoclonal antibody Ki 67	1426817_at	17345	0.0001	2.615	6971848	0.000110408	2.01
Mlph	NM_053015	melanophilin	1449896_at	171531	0	4.4862	6751520	0.000112752	2.01
Mmrn2	NM_153127	multimerin 2	1420276_x_at	105450	0	-4.73485	6818213	0.000509864	-2.21
Mobkl2b	NM_178061	MOB1 Mps One Binder kinase activator-like 2B (yeast)	1429284_at	214944	0.0009	2.5344	6920754	0.000409796	1.61
Mpdz	NM_010820	multiple PDZ domain protein	1418664_at	17475	0	-3.53482	6922808	6.85092e-06	-1.61
Mphosph1	BC048954	M-phase phosphoprotein 1	1439695_a_at	240641	0.0002	3.1485	6869370	0.000300967	1.41
Mpp6	NM_019939	membrane protein palmitoylated 6 (MAGUK p55 subfamily member 6)	1449348_at	56524	0	3.1966	6946138	0.000178405	1.81
Mpzl1	NM_001001880	myelin protein zero-like 1	1428167_a_at	68481	0.0035	-2.75482	6763777	0.0138035	-1.31
Mras	NM_008624	muscle and microspikes RAS	1453419_at	17532	0.0001	-2.51193	6998214	0.000465647	-1.51
Mrc2	NM_008626	mannose receptor C type 2	1421045_at	17534	0	-2.64201	6784564	0.0042137	-1.41
Mrpl32	NM_029271	mitochondrial ribosomal protein L32	1424372_at	75398	0	3.1276	6811140	0.0223188	1.21
Ms4a1	NM_007641	membrane-spanning 4-domains subfamily A member 1	1450912_at	12482	0.0056	-3.65497	6871542	0.0167181	-1.91
Ms4a4b	NM_021718	membrane-spanning 4-domains subfamily A member 4B	1423467_at	60361	0.0002	-2.45278	6868096	0.000934391	-2.21
Ms4a4c	NM_029499	membrane-spanning 4-domains subfamily A member 4C	1450291_s_at	64380	0	-5.04541	6868091	2.39573e-05	-1.91
Ms4a4d	NM_025658	membrane-spanning 4-domains subfamily A member 4D	1418990_at	66607	0.0001	-4.80307	6868110	5.0169e-05	-2.11
Msln	NM_018857	mesothelin	1460238_at	56047	0.0006	-4.34972	6854431	0.0278158	-2.01
Mt1	NM_013602	metallothionein 1	1422557_s_at	17748	0	5.3235	6978291	0.00466002	1.91
Mtap2	NM_008632	microtubule-associated protein 2	1434194_at	17756	0.0005	-2.07857	6750105	0.0242542	-1.11
Mtap4	NM_008633	microtubule-associated protein 4	1416091_at	17758	0.0003	-2.18962	6992415	0.0066752	-1.61
Mtus1	NM_001005865	mitochondrial tumor suppressor 1	1436501_at	102103	0.0002	-2.61028	6981905	0.0247385	-1.61
Muc1	NM_013605	mucin 1 transmembrane	1449199_at	17829	0	2.8619	6899218	0.00016984	2.41
Muc4	NM_080457	mucin 4	1438555_x_at	140474	0	4.7625	6840589	2.25148e-05	2.71
Mus81	NM_027877	MUS81 endonuclease homolog (yeast)	1431885_a_at	71711	0.0001	2.4439	6871119	0.0331809	1.31
Mustn1	AJ277212	musculoskeletal embryonic nuclear protein 1	1427201_at	66175	0.0004	-3.51741	6817954	8.29175e-05	-1.71
Mxra7	NM_026280	matrix-remodelling associated 7	1453855_at	67622	0.0219	-3.38409	6792550	0.00147375	-1.91
Mxra8	NM_024263	matrix-remodelling associated 8	1452330_a_at	74761	0	-2.52207	6919190	0.00838767	-1.61
Myc	NM_010849	myelocytomatosis oncogene	1424942_a_at	17869	0	3.02	6830927	0.000916316	1.81
Myct1	NM_026793	myc target 1	1447584_s_at	68632	0.0005	-3.48311	6771862	0.0322376	-1.61
Myh10	NM_175260	myosin heavy polypeptide 10 non-muscle	1452740_at	77579	0.0002	-3.38639	6781941	0.00415127	-2.01
Myh11	NM_013607	myosin heavy polypeptide 11 smooth muscle	1448962_at	17880	0.0061	-2.56937	6844112	0.0481069	-1.21
Myh6	NM_010856	myosin heavy polypeptide 6 cardiac muscle alpha	1448554_s_at	140781	0	10.98	6824785	5.51649e-07	4.21
Myl4	NM_010858	myosin light polypeptide 4	1422580_at	17896	0.0018	-3.02572	6784526	0.00020214	-1.41
Myo10	NM_019472	myosin X	1454731_at	17909	0	-2.16403	6829277	0.0152863	-1.61
Myo5b	NM_201600	myosin Vb	1452298_a_at	17919	0	2.2035	6862094	8.79353e-06	1.81
Myo6	NM_001039546	myosin VI	1435559_at	17920	0.0006	-3.06185	6990774	0.0237877	-1.61
Myrip	NM_144557	myosin VIIA and Rab interacting protein	1460601_at	245049	0.0001	-4.24809	6992942	0.00124837	-1.61
Naalad2	NM_028279	N-acetylated alpha-linked acidic dipeptidase 2	1422671_s_at	72560	0.0029	-2.01776	6993587	0.000660224	-1.41
Nab2	NM_008668	Ngfi-A binding protein 2	1417930_at	17937	0.0001	3.5236	6777960	0.000129567	2.01
Naprt1	NM_172607	nicotinate phosphoribosyltransferase domain containing 1	1454748_at	223646	0	2.3578	6836778	0.0117883	1.41
Nat6	NM_019750	N-acetyltransferase 6	1449954_at	15586	0.0077	-3.43643	6992225	0.00432641	-1.41
Ncald	NM_134094	neurocalcin delta	1417568_at	52589	0	-4.29553	6835045	0.0195062	-1.31
Ncoa3	NM_008679	nuclear receptor coactivator 3	1448027_at	17979	0.0006	-2.10704	6883210	0.00339809	-1.41
Ndrg2	NM_013864	N-myc downstream regulated gene 2	1448154_at	29811	0	-3.11721	6824610	0.000636368	-1.91
Nebl	NM_028757	nebulette	1438452_at	74103	0.0002	-2.46002	6884986	0.0350711	-1.21
Nek6	NM_021606	NIMA (never in mitosis gene a)-related expressed kinase 6	1425850_a_at	59126	0	4.0802	6876543	1.61569e-05	2.01
Neo1	NM_001042752	neogenin	1447693_s_at	18007	0.0002	-2.03252	6996018	0.00258309	-1.31
Nfatc4	NM_023699	nuclear factor of activated T-cells cytoplasmic calcineurin-dependent 4	1423380_s_at	73181	0	-2.29674	6819284	0.00298086	-1.41
Nfil3	NM_017373	nuclear factor interleukin 3 regulated	1418932_at	18030	0.0007	2.6833	6813246	0.000777396	2.21
Nhlrc2	NM_025811	NHL repeat containing 2	1453048_at	66866	0	-3.0012	6870617	0.00340567	-1.81
Nid1	NM_010917	nidogen 1	1416808_at	18073	0	-2.37135	6804893	0.00366907	-1.41
Nkg7	NM_024253	natural killer cell group 7 sequence	1450753_at	72310	0	-2.64271	6960144	0.000801398	-1.51
Nmnat2	NM_175460	nicotinamide nucleotide adenylyltransferase 2	1436155_at	226518	0	-2.33973	6754102	0.0176947	-1.21
Nola2	NM_026631	nucleolar protein family A member 2	1416606_s_at	52530	0	2.6561	6780863	0.000543808	1.31
Nostrin	NM_181547	nitric oxide synthase trafficker	1441075_at	329416	0	-4.24448	6877901	0.00958117	-1.91
Notch3	NM_008716	Notch gene homolog 3 (Drosophila)	1421964_at	18131	0.0003	-2.55493	6854864	0.000820068	-1.61
Notch4	NM_010929	Notch gene homolog 4 (Drosophila)	1449146_at	18132	0.0001	-3.63769	6850025	0.000780018	-2.01
Nova2	NM_001029877	neuro-oncological ventral antigen 2	1439192_at	384569	0.0006	-3.35121	6958975	0.0143264	-1.51
Nox4	NM_015760	NADPH oxidase 4	1419161_a_at	50490	0.0001	-5.27426	6962343	0.000337598	-2.61
Noxo1	NM_027988	NADPH oxidase organizer 1	1425151_a_at	71893	0.0005	4.2431	6849312	0.00185191	1.31
Npal1	NM_001081205	NIPA-like domain containing 1	1456321_at	70701	0.0001	3.0793	6928007	2.55918e-05	2.01
Npc2	NM_023409	Niemann Pick type C2	1455768_at	67963	0	2.925	6802349	9.98252e-07	2.51
Npr2	NM_173788	natriuretic peptide receptor 2	1427191_at	230103	0.0001	-2.21926	6913020	0.00590238	-1.51
Npr3	NM_001039181	natriuretic peptide receptor 3	1435184_at	18162	0	-5.41419	6834024	0.000125167	-3.31
Nptx1	NM_008730	neuronal pentraxin 1	1434877_at	18164	0.0091	-2.35183	6792708	0.0110291	-1.51
Nr2f2	NM_009697	nuclear receptor subfamily 2 group F member 2	1416158_at	11819	0	-2.86779	6968200	0.0071822	-1.41
Nrn1	NM_153529	neuritin 1	1428393_at	68404	0.0002	-3.12598	6812375	0.0204842	-1.81
Nrp2	NM_010939	neuropilin 2	1426528_at	18187	0.0017	-2.36855	6749911	0.00778987	-1.61
Nsg1	NM_010942	neuron specific gene family member 1	1423055_at	18196	0	-4.20521	6937585	2.73289e-05	-2.21
Nt5dc2	NM_027289	5'-nucleotidase domain containing 2	1424882_a_at	70021	0.0003	-3.72856	6817970	0.000161925	-2.11
Ntn1	NM_008744	netrin 1	1454974_at	18208	0	-2.8169	6789197	0.00662306	-1.41
Nuak1	NM_001004363	NUAK family SNF1-like kinase 1	1438684_at	77976	0.0002	-2.97796	6775625	0.0145069	-1.61
Nudt4	NM_027722	nudix (nucleoside diphosphate linked moiety X)-type motif 4	1418505_at	71207	0	2.1561	6776198	0.0110178	1.61
Nup210	NM_018815	nucleoporin 210	1417585_at	54563	0	-2.04541	6955514	0.0238644	-1.41
Nusap1	NM_001042652	nucleolar and spindle associated protein 1	1416309_at	108907	0	2.3835	6880529	0.000111682	1.51
Nxn	NM_008750	nucleoredoxin	1422465_a_at	18230	0	-2.82805	6789813	3.15924e-06	-1.31
Oas2	NM_145227	2'-5' oligoadenylate synthetase 2	1425065_at	246728	0.0022	-2.23714	6941647	0.000325841	-1.41
Oasl2	NM_011854	2'-5' oligoadenylate synthetase-like 2	1453196_a_at	23962	0.0012	-2.92997	6933625	0.000114838	-1.71
Ociad2	NM_026950	OCIA domain containing 2	1435917_at	433904	0	2.7262	6939130	0.000103862	1.51
Ogn	NM_008760	osteoglycin	1419662_at	18295	0.0017	-9.27644	6806960	0.00137785	-2.61
Oit1	NM_146050	oncoprotein induced transcript 1	1424502_at	18300	0.0029	14.6671	6822478	0.00209887	1.61
Olfml1	NM_172907	olfactomedin-like 1	1434632_at	244198	0	-3.29272	6963267	0.000810826	-2.11
Olfml2b	NM_177068	olfactomedin-like 2B	1423915_at	320078	0	4.161	6755125	0.00148515	1.81
Olfml3	NM_133859	olfactomedin-like 3	1448475_at	99543	0.0003	-2.50941	6907784	0.00160652	-1.41
OTTMUSG00000016644	AK090072	predicted gene OTTMUSG00000016644	1435529_at	667373	0	-3.29164	6872785	0.00167714	-1.51
Otub2	NM_026580	OTU domain ubiquitin aldehyde binding 2	1417575_at	68149	0	-2.65534	6797538	0.00206339	-1.41
Pafah1b3	NM_008776	platelet-activating factor acetylhydrolase isoform 1b alpha1 subunit	1416410_at	18476	0	3.3979	6965940	6.44865e-06	2.11
Palld	NM_001081390	palladin cytoskeletal associated protein	1433768_at	72333	0	-3.7679	6982828	2.33116e-05	-1.51
Palmd	NM_023245	palmdelphin	1417251_at	114301	0	-4.22476	6908528	0.00399077	-1.41
Papss2	NM_011864	3'-phosphoadenosine 5'-phosphosulfate synthase 2	1434510_at	23972	0.001	-3.22373	6869216	9.16128e-05	-2.01
Paqr3	NM_198422	progestin and adipoQ receptor family member III	1429216_at	231474	0.0059	-2.5413	6940201	0.0157954	-1.21
Paqr8	NM_028829	progestin and adipoQ receptor family member VIII	1435246_at	74229	0	3.2777	6747986	1.28441e-05	2.21
Parvb	NM_133167	parvin beta	1438672_at	170736	0.0002	-4.23012	6832300	0.00315428	-1.71
Pcbd1	NM_025273	pterin 4 alpha carbinolamine dehydratase/dimerization cofactor of hepatocyte nuclear factor 1 alpha (TCF1) 1	1418713_at	13180	0	6.9326	6768198	0.00063952	2.21
Pcbp3	NM_021568	poly(rC) binding protein 3	1437722_x_at	59093	0.0028	-3.45304	6775192	0.0355827	-1.51
Pcdh1	NM_029357	protocadherin 1	1452294_at	75599	0	-3.00481	6864776	0.00284699	-1.81
Pcdh12	NM_017378	protocadherin 12	1437928_at	53601	0.0002	-2.94551	6864783	0.00373487	-1.81
Pcdh18	NM_130448	protocadherin 18	1422890_at	73173	0.0002	-4.44247	6904856	0.00529852	-1.91
Pcdh19	XM_205287	protocadherin 19	1455145_at	279653	0	-3.37838	7019480	0.0017469	-1.31
Pcdhb16	NM_053141	protocadherin beta 16	1441994_at	93887	0.0017	-3.54108	6860198	5.32371e-05	-1.41
Pcdhb17	NM_053142	protocadherin beta 17	1448933_at	93888	0	-2.69034	6860199	0.0008744	-1.41
Pcdhb20	NM_053145	protocadherin beta 20	1449583_at	93891	0.0001	-2.09996	6860207	2.54772e-05	-1.31
Pcnx	NM_018814	pecanex homolog (Drosophila)	1419047_at	54604	0	-2.18436	6796485	0.00573325	-1.61
Pcolce2	NM_029620	procollagen C-endopeptidase enhancer 2	1451527_at	76477	0.0001	-5.12821	6991538	0.00162003	-2.41
Pcsk5	D12619	proprotein convertase subtilisin/kexin type 5	1451406_a_at	18552	0.0004	-4.05022	6871879	0.0169626	-1.31
Pcsk6	XM_919486	proprotein convertase subtilisin/kexin type 6	1426981_at	18553	0	6.0842	6961192	0.000590081	2.41
Pcx	NM_008797	pyruvate carboxylase	AFFX-PyruCarbMur/L09192_3_at	18563	0.0001	3.0507	6867677	0.00216536	2.51
Pde4b	NM_019840	phosphodiesterase 4B cAMP specific	1422473_at	18578	0.0115	-2.83447	6915856	0.00224057	-1.31
Pde7b	NM_013875	phosphodiesterase 7B	1445539_at	29863	0	2.4502	6772550	4.66947e-05	1.41
Pde8a	NM_008803	phosphodiesterase 8A	1418406_at	18584	0	-2.12857	6962054	3.80314e-05	-1.61
Pde9a	NM_008804	phosphodiesterase 9A	1449403_at	18585	0.0002	-4.0833	6849779	3.92361e-05	-1.71
Pdgfa	AK017169	platelet derived growth factor alpha	1449187_at	18590	0.0018	-2.08551	6942654	1.57512e-05	-1.61
Pdgfb	NM_011057	platelet derived growth factor B polypeptide	1450413_at	18591	0.0019	-3.3557	6837144	0.0091998	-1.61
Pdgfra	NM_011058	platelet derived growth factor receptor alpha polypeptide	1438946_at	18595	0.0001	-5.16529	6931740	0.00660549	-1.61
Pdzd2	NM_001081064	PDZ domain containing 2	1435553_at	68070	0	-3.50263	6834061	0.0306886	-1.91
Pdzk1ip1	NM_026018	PDZK1 interacting protein 1	1417689_a_at	67182	0.0003	2.6168	6916488	0.00974298	1.51
Pecam1	NM_001032378	platelet/endothelial cell adhesion molecule 1	1421287_a_at	18613	0.0002	-4.27899	6791960	0.00150484	-2.31
Perp	NM_022032	PERP TP53 apoptosis effector	1416271_at	64058	0.0001	2.5782	6766301	0.0151899	2.01
Pfkfb3	NM_133232	6-phosphofructo-2-kinase/fructose-2 6-biphosphatase 3	1416432_at	170768	0	-3.47705	6884709	6.31553e-05	-1.81
Pglyrp1	NM_009402	peptidoglycan recognition protein 1	1449184_at	21946	0	11.3059	6958974	0.00259117	2.21
Pgm2	NM_028132	phosphoglucomutase 2	1451149_at	72157	0	2.6425	6915791	1.22322e-05	1.71
Pgr	NM_008829	progesterone receptor	1439527_at	18667	0	-7.69823	6986781	0.000449139	-1.61
Pgrmc1	NM_016783	progesterone receptor membrane component 1	1423451_at	53328	0.0001	-3.06937	7010657	0.000984769	-1.61
Pgs1	NM_133757	phosphatidylglycerophosphate synthase 1	1454046_x_at	74451	0	2.1426	6785321	3.6377e-05	1.41
Phactr1	NM_001005740	phosphatase and actin regulator 1	1439022_at	218194	0.0031	-3.20924	6806581	0.00410722	-1.91
Phlda1	NM_009344	pleckstrin homology-like domain family A member 1	1418835_at	21664	0	2.5089	6770722	0.0059854	2.21
Phldb1	NM_153537	pleckstrin homology-like domain family B member 1	1424467_at	102693	0.0014	-2.0829	6995120	9.8321e-05	-1.41
Phlpp	XM_984950	PH domain and leucine rich repeat protein phosphatase	1426994_at	98432	0.0003	-2.531	6752083	0.00756863	-1.51
Pi4k2b	NM_028744	phosphatidylinositol 4-kinase type 2 beta	1416489_at	67073	0	2.3668	6930838	0.000122701	1.41
Pip5k1b	NM_008846	phosphatidylinositol-4-phosphate 5-kinase type 1 beta	1421833_at	18719	0.0004	2.8127	6872262	1.73416e-06	2.31
Pitpnc1	NM_145823	phosphatidylinositol transfer protein cytoplasmic 1	1452939_a_at	71795	0.0003	-5.45852	6791995	0.0412292	-1.31
Piwil4	NM_177905	piwi-like homolog 4 (Drosophila)	1447564_x_at	330890	0.0001	4.635	6993471	0.00103129	2.41
Pkhd1	NM_153179	polycystic kidney and hepatic disease 1	1419820_at	241035	0.0009	65.2977	6757270	0.000325668	1.31
Pkia	NM_008862	protein kinase inhibitor alpha	1420859_at	18767	0	-2.9824	6895532	0.0185205	-1.21
Pkib	NM_001039053	protein kinase inhibitor beta cAMP dependent testis specific	1421137_a_at	18768	0.0001	4.1804	6768071	1.15018e-05	2.01
Pkig	NM_001039390	protein kinase inhibitor gamma	1434820_s_at	18769	0.0004	-2.61165	6883034	0.00171274	-1.51
Pkn3	NM_153805	protein kinase N3	1434525_at	263803	0.0017	-2.23015	6876037	0.000236139	-1.51
Pknox2	NM_001029838	Pbx/knotted 1 homeobox 2	1433907_at	208076	0	-3.35683	6994672	0.00127801	-1.51
Pla2g1b	NM_011107	phospholipase A2 group IB pancreas	1437015_x_at	18778	0.0001	3.188	6933672	0.00118265	2.11
Pla2g4b	NM_145378	phospholipase A2 group IVB (cytosolic)	1425045_at	211429	0	4.0135	6880556	0.00312707	1.21
Pla2g4f	NM_001024145	phospholipase A2 group IVF	1455408_at	271844	0	3.4379	6890295	3.93168e-05	1.91
Pla2g7	NM_013737	phospholipase A2 group VII (platelet-activating factor acetylhydrolase plasma)	1430700_a_at	27226	0	3.7633	6850534	0.00591422	1.61
Pla2r1	NM_008867	phospholipase A2 receptor 1	1450144_at	18779	0	-3.21234	6887082	0.00141462	-1.91
Plac8	AJ422151	placenta-specific 8	1451335_at	231507	0.0001	-2.61506	6940358	0.0032581	-1.71
Plcb4	NM_013829	phospholipase C beta 4	1435771_at	18798	0.0002	-3.27976	6881455	0.00041153	-1.81
Plcd1	NM_019676	phospholipase C delta 1	1416675_s_at	18799	0.0001	-2.89436	6999404	0.000967087	-1.31
Plcd3	NM_152813	phospholipase C delta 3	1431892_a_at	72469	0	3.7325	6791666	0.00265685	1.71
Plce1	NM_019588	phospholipase C epsilon 1	1452398_at	74055	0.0005	-2.72183	6869570	0.00219174	-1.51
Plch1	NM_183191	phospholipase C eta 1	1457157_at	269437	0.0001	4.8181	6905570	0.00215203	2.21
Plch2	NM_175556	phospholipase C eta 2	1436335_at	269615	0.0021	2.7268	6927238	0.00295885	1.31
Plcl1	BC046582	phospholipase C-like 1	1445723_at	227120	0.0004	-5.31915	6749582	0.00146951	-1.51
Pld1	NM_008875	phospholipase D1	1437113_s_at	18805	0.0001	2.1664	6896406	3.63399e-06	1.81
Plekha2	NM_031257	pleckstrin homology domain-containing family A (phosphoinositide binding specific) member 2	1417289_at	83436	0.0006	-2.43191	6981113	0.000212228	-1.51
Plekho1	NM_023320	pleckstrin homology domain containing family O member 1	1417128_at	67220	0	-2.23264	6907226	0.00435234	-1.21
Plod2	NM_011961	procollagen lysine 2-oxoglutarate 5-dioxygenase 2	1416687_at	26432	0.0231	-5.17331	6991383	0.00146846	-2.11
Plscr1	NM_011636	phospholipid scramblase 1	1429527_a_at	22038	0.0011	-2.03004	6991358	0.00446554	-1.31
Plscr2	NM_008880	phospholipid scramblase 2	1448961_at	18828	0.0001	-5.87199	6991362	0.00248882	-2.31
Plscr4	NM_178711	phospholipid scramblase 4	1443406_at	235527	0.0008	-5.66893	6991368	0.000174916	-2.01
Pltp	NM_011125	phospholipid transfer protein	1417963_at	18830	0	-4.06174	6892964	0.000645284	-1.91
Plvap	NM_032398	plasmalemma vesicle associated protein	1418090_at	84094	0	-3.25627	6983262	1.43732e-05	-3.31
Plxdc1	NM_028199	plexin domain containing 1	1424902_at	72324	0	-4.12712	6791229	0.00912025	-1.61
Plxdc2	NM_026162	plexin domain containing 2	1449270_at	67448	0.0113	-4.61042	6875214	0.00154834	-1.91
Plxnb1	NM_172775	plexin B1	1435255_at	235611	0.0003	2.2245	6992387	1.78518e-07	2.41
Pmp22	NM_008885	peripheral myelin protein	1417133_at	18858	0.0002	-2.56739	6781612	0.0025535	-1.61
Pnkd	NM_001039509	paroxysmal nonkinesiogenic dyskinesia	1418746_at	56695	0	-2.6738	6750532	0.00759444	-1.41
Podxl	NM_013723	podocalyxin-like	1417396_at	27205	0.0108	-3.00933	6952500	0.000419855	-2.31
Pon3	NM_173006	paraoxonase 3	1419298_at	269823	0	2.0561	6951401	0.00297189	1.41
Popdc2	NM_001081984	popeye domain containing 2	1417806_at	64082	0	-2.89939	6840841	0.000358321	-1.61
Popdc3	NM_024286	popeye domain containing 3	1423856_at	78977	0.0001	-4.75511	6767613	6.62915e-05	-1.41
Pp11r	NM_008902	placental protein 11 related	1449937_at	19011	0	-2.87439	6838331	4.89679e-05	-1.41
Ppa1	NM_026438	pyrophosphatase (inorganic) 1	1416939_at	67895	0	2.233	6768232	0.0119485	1.71
Ppa2	NM_146141	pyrophosphatase (inorganic) 2	1424488_a_at	74776	0	2.2219	6901498	0.000289575	1.41
Ppap2a	NM_008903	phosphatidic acid phosphatase 2a	1422619_at	19012	0.0001	-4.93583	6810299	0.000371612	-2.21
Ppap2c	NM_015817	phosphatidic acid phosphatase type 2c	1451210_at	50784	0	4.0484	6775298	0.000467959	3.01
Ppbp	NM_023785	pro-platelet basic protein	1418480_at	57349	0.0007	-5.60538	6932367	0.0102458	-1.81
Ppm1f	NM_176833	protein phosphatase 1F (PP2C domain containing)	1454934_at	68606	0	-2.40096	6839703	0.000160678	-1.81
Ppp1r13l	NM_001010836	protein phosphatase 1 regulatory (inhibitor) subunit 13 like	1459592_a_at	333654	0	2.9332	6959007	0.00194927	1.51
Ppp1r14a	NM_026731	protein phosphatase 1 regulatory (inhibitor) subunit 14A	1418086_at	68458	0	-5.29661	6959487	0.000253358	-1.61
Ppp1r16b	NM_153089	protein phosphatase 1 regulatory (inhibitor) subunit 16B	1455080_at	228852	0	-3.16957	6882768	0.00754554	-1.81
Ppp1r2	NM_025800	protein phosphatase 1 regulatory (inhibitor) subunit 2	1456830_at	66849	0	-2.18866	6845074	0.00896329	-1.51
Ppp1r9a	NM_181595	protein phosphatase 1 regulatory (inhibitor) subunit 9A	1432037_at	243725	0	4.3499	6943862	0.00309861	1.71
Ppp2r1b	NM_001034085	protein phosphatase 2 (formerly 2A) regulatory subunit A (PR 65) beta isoform	1428265_at	73699	0	-3.05157	6989045	0.00223659	-1.31
Pqlc1	NM_025861	PQ loop repeat containing 1	1426567_a_at	66943	0.0029	2.6969	6862462	0.00223363	1.31
Prc1	NM_145150	protein regulator of cytokinesis 1	1423775_s_at	233406	0.0001	3.102	6961987	3.44027e-05	2.31
Prdm1	NM_007548	PR domain containing 1 with ZNF domain	1420425_at	12142	0.0026	-2.39808	6773655	0.0247994	-1.41
Prdm6	NM_001033281	PR domain containing 6	1436962_at	225518	0	-3.07598	6860936	0.000996184	-1.31
Prdx3	NM_007452	peroxiredoxin 3	1416292_at	11757	0	2.2577	6874215	0.0412351	1.51
Prelp	NM_054077	proline arginine-rich end leucine-rich repeat	1416321_s_at	116847	0.0001	-3.26584	6762328	0.00403393	-1.41
Prickle1	NM_001033217	prickle like 1 (Drosophila)	1452249_at	106042	0.0002	-4.8216	6838046	0.0100223	-2.01
Prkab2	NM_182997	protein kinase AMP-activated beta 2 non-catalytic subunit	1435875_at	108097	0	-2.70197	6899838	0.00311754	-1.51
Prkar1b	NM_008923	protein kinase cAMP dependent regulatory type I beta	1440132_s_at	19085	0.0037	-2.17202	6942655	1.6658e-05	-1.41
Prkce	NM_011104	protein kinase C epsilon	1452878_at	18754	0.0001	-3.003	6852820	0.0147254	-1.31
Prkcm	NM_008858	protein kinase C mu	1447623_s_at	18760	0.0003	-2.92398	6800675	0.00126431	-1.41
Prkcq	NM_008859	protein kinase C theta	1426044_a_at	18761	0.0007	-4.1632	6874979	0.00108794	-1.91
Prkd2	NM_178900	protein kinase D2	1434333_a_at	101540	0	-2.94551	6958914	7.88679e-06	-1.81
Prkg1	NM_011160	protein kinase cGMP-dependent type I	1449876_at	19091	0.0214	-5.29661	6872616	0.0274874	-1.31
Prkg2	NM_008926	protein kinase cGMP-dependent type II	1435162_at	19092	0	-6.96864	6940300	0.000588156	-2.21
Prrx1	NM_175686	paired related homeobox 1	1439774_at	18933	0.0016	-2.35294	6763646	0.000950756	-1.41
Prss23	NM_029614	protease serine 23	1431057_a_at	76453	0	-3.39559	6969207	5.0463e-06	-2.01
Prss8	NM_133351	protease serine 8 (prostasin)	1418320_at	76560	0.001	2.486	6971412	0.0474243	1.51
Prx	NM_019412	periaxin	1423292_a_at	19153	0.0007	-3.11236	6959306	0.00783321	-1.81
Psat1	NM_177420	phosphoserine aminotransferase 1	1454607_s_at	107272	0.0002	5.1028	6871768	0.000175626	2.61
Pscd3	NM_011182	pleckstrin homology Sec7 and coiled-coil domains 3	1418758_a_at	19159	0	-3.15956	6935408	0.00165426	-1.71
Psrc1	NM_019976	proline/serine-rich coiled-coil 1	1425416_s_at	56742	0.0009	8.908	6911013	1.13675e-05	3.61
Ptges	NM_022415	prostaglandin E synthase	1449450_at	64292	0.0006	2.3258	6885796	0.00169275	1.41
Ptgfr	AK014673	prostaglandin F receptor	1446331_at	19220	0.0002	-8.1103	6910597	0.00165532	-1.81
Ptgis	NM_008968	prostaglandin I2 (prostacyclin) synthase	1448816_at	19223	0.0001	-3.33778	6893139	0.000343525	-1.91
Ptgs1	AK167357	prostaglandin-endoperoxide synthase 1	1436448_a_at	19224	0	2.4117	6876430	2.84399e-05	1.51
Ptplb	NM_023587	protein tyrosine phosphatase-like (proline instead of catalytic arginine) member b	1449342_at	70757	0	2.2083	6840699	0.0361065	1.41
Ptpn2	NM_008977	protein tyrosine phosphatase non-receptor type 2	1425197_at	19255	0	2.2427	6866307	0.00378547	1.31
Ptprb	NM_029928	protein tyrosine phosphatase receptor type B	1427486_at	19263	0.0067	-4.0016	6770908	0.00631429	-2.21
Ptprd	NM_011211	protein tyrosine phosphatase receptor type D	1435537_at	19266	0.0001	-3.90016	6930077	0.00779556	-1.81
Ptpre	NM_011212	protein tyrosine phosphatase receptor type E	1418540_a_at	19267	0.0001	-2.1631	6964798	0.0359821	-1.31
Ptprg	NM_008981	protein tyrosine phosphatase receptor type G	1456070_at	19270	0.0343	-2.52143	6816951	0.0172194	-1.21
Ptprn	NM_008985	protein tyrosine phosphatase receptor type N	1416588_at	19275	0	10.5853	6759789	1.24127e-06	8.71
Pvrl2	NM_008990	poliovirus receptor-related 2	1424456_at	19294	0	2.9733	6973589	1.73413e-06	2.21
Pvrl4	NM_027893	poliovirus receptor-related 4	1428701_at	71740	0.0001	3.0534	6755175	0.00106352	1.71
Pxdn	NM_181395	peroxidasin homolog (Drosophila)	1428259_at	69675	0	-3.67782	6794111	0.00358316	-2.01
Pygm	NM_011224	muscle glycogen phosphorylase	1448602_at	19309	0.003	-3.22373	6867859	0.00111402	-1.91
Rab15	NM_134050	RAB15 member RAS oncogene family	1417829_a_at	104886	0	4.1606	6801917	2.02097e-06	3.31
Rab25	NM_016899	RAB25 member RAS oncogene family	1417738_at	53868	0	4.5471	6906762	0.00576279	1.61
Rab2b	NM_172601	RAB2B member RAS oncogene family	1428115_a_at	76338	0.0005	-2.37699	6824662	0.0015252	-1.41
Rab38	NM_028238	Rab38 member of RAS oncogene family	1417700_at	72433	0.0001	2.8487	6962379	0.00177201	2.01
Rab6b	NM_173781	RAB6B member RAS oncogene family	1434914_at	270192	0.0003	-2.4432	6992012	0.00258808	-1.31
Rac3	BC025842	RAS-related C3 botulinum substrate 3	1420554_a_at	170758	0	2.5621	6785483	0.0136041	1.41
Racgap1	NM_012025	Rac GTPase-activating protein 1	1421546_a_at	26934	0.0001	2.6858	6838469	5.64313e-05	1.71
Rai14	NM_030690	retinoic acid induced 14	1417400_at	75646	0	2.4746	6833980	2.98003e-05	1.91
Ramp2	NM_019444	receptor (calcitonin) activity modifying protein 2	1418187_at	54409	0.0003	-3.06654	6784251	0.000304929	-2.41
Rap1gap	NM_001081155	Rap1 GTPase-activating protein	1428443_a_at	110351	0	7.7803	6917963	7.33659e-05	2.91
Rapgef3	NM_144850	Rap guanine nucleotide exchange factor (GEF) 3	1437012_x_at	223864	0	-3.35008	6838332	0.00384033	-1.71
Rapgef4	NM_019688	Rap guanine nucleotide exchange factor (GEF) 4	1425518_at	56508	0.0006	-3.41297	6878038	0.00100923	-1.71
Rarres2	NM_027852	retinoic acid receptor responder (tazarotene induced) 2	1428538_s_at	71660	0.0003	-3.01477	6953395	0.000329877	-1.71
Rasal2	NM_177644	RAS protein activator like 2	1436910_at	226525	0.0006	-4.84966	6763316	0.0041735	-1.91
Rasgrf1	NM_011245	RAS protein-specific guanine nucleotide-releasing factor 1	1424734_at	19417	0.002	4.337	6991261	2.22188e-07	2.71
Rasgrp2	NM_011242	RAS guanyl releasing protein 2	1417804_at	19395	0	-4.64037	6867860	0.00167275	-1.81
Rasgrp3	NM_207246	RAS guanyl releasing protein 3	1438031_at	240168	0.0362	-4.65549	6852235	0.00616961	-2.31
Rasip1	NM_028544	Ras interacting protein 1	1428016_a_at	69903	0.0014	-2.83206	6960388	0.000720531	-1.91
Rasl11a	NM_026864	RAS-like family 11 member A	1429444_at	68895	0.0017	2.6541	6935557	0.000761273	2.01
Rassf8	NM_027760	Ras association (RalGDS/AF-6) domain family 8	1452283_at	71323	0	-2.10172	6951042	0.00407995	-1.31
Rbm35a	NM_194055	RNA binding motif protein 35A	1454681_at	207920	0	3.8435	6919693	7.22569e-07	2.51
Rbm35b	NM_176838	RNA binding motif protein 35b	1433683_at	77411	0	3.6095	6985021	4.96933e-07	2.01
Rbp1	NM_011254	retinol binding protein 1 cellular	1448754_at	19659	0	-2.38607	6991714	0.000148021	-2.11
Rbpms2	NM_028030	RNA binding protein with multiple splicing 2	1424008_a_at	71973	0.0005	-2.16403	6989948	0.00112351	-1.61
Rcc2	NM_173867	regulator of chromosome condensation 2	1452226_at	108911	0	2.3081	6918098	0.0026107	1.21
Rcn1	NM_009037	reticulocalbin 1	1417090_at	19672	0	-3.08071	6889413	0.000125233	-1.71
Rcsd1	NM_178593	RCSD domain containing 1	1424194_at	226594	0	-2.94985	6763787	0.00153811	-1.51
Reck	NM_016678	reversion-inducing-cysteine-rich protein with kazal motifs	1450784_at	53614	0	-3.97298	6913039	9.20759e-05	-2.31
Reep1	NM_178608	receptor accessory protein 1	1433509_s_at	52250	0.0003	-2.79877	6946945	8.33289e-05	-1.41
Reep3	NM_178606	receptor accessory protein 3	1424779_at	28193	0	2.5771	6774659	0.000166442	1.21
Reep4	NM_180588	receptor accessory protein 4	1428478_at	72549	0.0001	2.3271	6820084	0.000644559	1.71
Reep6	NM_139292	receptor accessory protein 6	1430128_a_at	70335	0	4.2559	6769212	0.0204806	2.11
Reps2	NM_178256	RALBP1 associated Eps domain containing protein 2	1435389_at	194590	0.0002	-2.11775	7020626	0.00504338	-1.21
Retnla	NM_020509	resistin like alpha	1449015_at	57262	0.0093	4.5164	6841362	0.0277712	2.81
Rfc5	NM_028128	replication factor C (activator 1) 5	1452917_at	72151	0	2.1029	6941423	0.00395592	1.31
Rfk	NM_019437	riboflavin kinase	1415737_at	54391	0	2.183	6868404	0.0133509	1.71
Rftn2	NM_028713	raftlin family member 2	1428895_at	74013	0.0003	-3.37952	6758754	0.000284839	-1.61
Rgl1	NM_016846	ral guanine nucleotide dissociation stimulator -like 1	1418535_at	19731	0.0001	-3.13185	6763090	0.00800066	-1.61
Rgs10	NM_026418	regulator of G-protein signalling 10	1416882_at	67865	0	2.7285	6971437	0.000901306	1.61
Rgs12	AK053804	regulator of G-protein signaling 12	1453129_a_at	71729	0.0001	-3.74111	6929861	0.0013554	-1.81
Rgs16	NM_011267	regulator of G-protein signaling 16	1455265_a_at	19734	0.0009	15.7123	6754138	1.28248e-05	3.11
Rgs3	NM_134257	regulator of G-protein signaling 3	1449516_a_at	50780	0	-2.72257	6913985	0.0306144	-1.21
Rgs5	NM_009063	regulator of G-protein signaling 5	1417466_at	19737	0.0102	-2.40732	6755054	0.00124652	-1.51
Rgs9	NM_011268	regulator of G-protein signaling 9	1418691_at	19739	0.0001	-2.87026	6792079	0.00746095	-1.61
Rhbdl2	AK162292	rhomboid veinlet-like 2 (Drosophila)	1445233_at	230726	0.0002	22.9836	6916991	2.35167e-06	4.31
Rhobtb3	NM_028493	Rho-related BTB domain containing 3	1433647_s_at	73296	0	-2.16123	6814441	0.0138351	-1.41
Rhod	NM_007485	ras homolog gene family member D	1419061_at	11854	0.0004	2.9765	6871002	0.0026747	1.51
Rhoj	NM_023275	ras homolog gene family member J	1418892_at	80837	0.0016	-3.39905	6796121	0.0298555	-1.41
Rhou	NM_133955	ras homolog gene family member U	1449027_at	69581	0	3.2833	6979721	0.00218323	2.01
Rian	AB063319	RNA imprinted and accumulated in nucleus	1452899_at	75745	0	27.0254	6797993	3.00805e-06	8.71
Rin1	NM_145495	Ras and Rab interactor 1	1424507_at	225870	0.0001	3.1465	6867715	3.31017e-05	1.41
Ripk4	NM_023663	receptor-interacting serine-threonine kinase 4	1418488_s_at	72388	0	2.4069	6848209	0.00106533	1.51
Rnf128	NM_023270	ring finger protein 128	1418318_at	66889	0	11.6166	7014110	0.00875295	3.21
Rnf149	NM_001033135	ring finger protein 149	1429321_at	67702	0	2.9355	6758032	0.000267573	1.41
Rnf167	NM_027445	ring finger protein 167	1430527_a_at	70510	0.0015	-2.28571	6782139	0.000337842	-1.41
Rnf186	NM_025786	ring finger protein 186	1424794_at	66825	0	2.4511	6918028	0.0131577	1.81
Rnf5	NM_019403	ring finger protein 5	1422888_at	54197	0	2.4076	6855037	0.0029402	1.31
Robo1	NM_019413	roundabout homolog 1 (Drosophila)	1427231_at	19876	0.0001	-4.36681	6842326	0.000244825	-1.51
Robo4	NM_028783	roundabout homolog 4 (Drosophila)	1426206_at	74144	0.0006	-2.48756	6988213	0.000400099	-1.91
Ros1	NM_011282	Ros1 proto-oncogene	1425970_a_at	19886	0	7.9152	6773933	2.90612e-08	4.51
RP23-157O10.7	NM_018873	P140 gene	1436621_at	56013	0.0005	2.4391	6791204	1.38445e-05	1.71
RP23-357I14.1	XM_983887	novel protein similar to solute carrier family 28 (sodium-coupled nucleoside transporter) member 2 (Slc28a2)	1450639_at	381417	0.0005	-3.16156	6880694	0.005619	-1.61
Rpo1-1	NM_009085	RNA polymerase 1-1	1417041_at	20016	0	2.2672	6855675	0.0102037	1.31
Rras2	NM_025846	related RAS viral (r-ras) oncogene homolog 2	1448689_at	66922	0	-2.06356	6970635	0.000356325	-1.31
Rsad2	NM_021384	radical S-adenosyl methionine domain containing 2	1421009_at	58185	0.0004	-4.13052	6799525	0.0143639	-1.71
Rtkn	NM_133641	rhotekin	1425601_a_at	20166	0	2.8114	6947396	5.1748e-06	1.41
Rtn2	NM_013648	reticulon 2 (Z-band associated protein)	1419056_at	20167	0.0002	-3.33444	6959000	0.000225282	-1.51
Rtp3	NM_153100	receptor transporter protein 3	1452472_at	235636	0	-3.72301	6998907	0.00370479	-1.71
Rtp4	NM_023386	receptor transporter protein 4	1418580_at	67775	0.0003	-2.18627	6840129	7.23346e-05	-1.91
Runx1t1	NM_009822	runt-related transcription factor 1; translocated to 1 (cyclin D-related)	1448785_at	12395	0	-4.20698	6911833	0.0116323	-1.41
Rusc2	NM_199057	RUN and SH3 domain containing 2	1426791_at	100213	0.0029	-2.96384	6913002	0.000246349	-1.41
S100a1	NM_011309	S100 calcium binding protein A1	1417421_at	20193	0	2.2658	6906903	0.000336035	1.31
S100a14	NM_025393	S100 calcium binding protein A14	1449166_at	66166	0	13.4175	6899360	1.45125e-05	3.81
Sacs	AK173011	sacsin	1434958_at	50720	0	-2.48694	6819596	0.00452347	-1.41
Samd10	NM_172676	sterile alpha motif domain containing 10	1435756_at	229011	0.0001	2.9123	6894304	0.000124594	1.51
Samd4	NM_001037221	sterile alpha motif domain containing 4	1436356_at	74480	0.0046	-2.81136	6818667	0.0335806	-1.31
Satb1	NM_009122	special AT-rich sequence binding protein 1	1416007_at	20230	0.0054	-2.6462	6855981	0.00796486	-1.51
Sbf2	BC051221	SET binding factor 2	1443762_s_at	319934	0	-2.52717	6970420	0.00215104	-1.51
Scamp1	NM_029153	secretory carrier membrane protein 1	1453054_at	107767	0.0003	2.7106	6815188	2.56803e-06	1.71
Scarf1	NM_001004157	scavenger receptor class F member 1	1434490_at	380713	0	-2.35128	6782449	0.00744138	-1.51
Scd1	NM_009127	stearoyl-Coenzyme A desaturase 1	1415965_at	20249	0.0001	2.2968	6873271	4.23812e-06	1.31
Scel	NM_022886	sciellin	1422837_at	64929	0.0001	-2.18914	6821514	0.00267916	-1.51
Scn3a	NM_018732	sodium channel voltage-gated type III alpha	1439204_at	20269	0.0001	-6.51042	6887324	0.00174362	-2.01
Scn7a	NM_009135	sodium channel voltage-gated type VII alpha	1436043_at	20272	0.0019	-3.42818	6887380	0.0222912	-1.81
Scnn1g	NM_011326	sodium channel nonvoltage-gated 1 gamma	1419079_at	20278	0	-2.50125	6964011	0.00040097	-1.51
Scrn1	NM_027268	secernin 1	1439500_at	69938	0.0001	-3.46141	6953762	0.000461078	-2.21
Scube2	NM_020052	signal peptide CUB domain EGF-like 2	1453486_a_at	56788	0.0003	-9.35454	6970392	0.000183731	-2.81
Sdc1	NM_011519	syndecan 1	1437279_x_at	20969	0.0001	2.7408	6793226	1.67399e-06	1.91
Sdc2	NM_008304	syndecan 2	1448545_at	15529	0.0009	-2.50188	6829598	0.000163556	-1.91
Sdc3	NM_011520	syndecan 3	1450027_at	20970	0	-2.18723	6917389	0.00849593	-1.61
Sdf4	NM_011341	stromal cell derived factor 4	1448367_at	20318	0.0012	-2.41779	6919208	0.00945873	-1.11
Sdpr	NM_138741	serum deprivation response	1443832_s_at	20324	0.0198	-4.51264	6749352	0.0257105	-1.81
Sell	NM_011346	selectin lymphocyte	1419481_at	20343	0	-3.74813	6754681	0.0211307	-1.51
Selm	NM_053267	selenoprotein M	1424394_at	114679	0	-2.99222	6778298	0.00489812	-1.91
Sema3c	NM_013657	sema domain immunoglobulin domain (Ig) short basic domain secreted (semaphorin) 3C	1420696_at	20348	0.0002	-2.82087	6928965	0.0077391	-2.41
Sema3e	NM_011348	sema domain immunoglobulin domain (Ig) short basic domain secreted (semaphorin) 3E	1419717_at	20349	0.0003	-4.47227	6928880	0.0216511	-1.41
Sema3f	NM_011349	sema domain immunoglobulin domain (Ig) short basic domain secreted (semaphorin) 3 F	1420508_at	20350	0	-3.10655	6998646	0.00101597	-1.91
Sema3g	NM_001025379	sema domain immunoglobulin domain (Ig) short basic domain secreted (semaphorin) 3G	1435361_at	218877	0.0002	-5.35619	6817980	0.00021934	-2.21
Sema4a	NM_013658	sema domain immunoglobulin domain (Ig) transmembrane domain (TM) and short cytoplasmic domain (semaphorin) 4A	1448110_at	20351	0.0002	2.2121	6906749	0.000551498	1.81
Sema4g	NM_011976	sema domain immunoglobulin domain (Ig) transmembrane domain (TM) and short cytoplasmic domain (semaphorin) 4G	1449202_at	26456	0	3.1522	6869974	0.00197182	1.31
Sema6a	NM_018744	sema domain transmembrane domain (TM) and cytoplasmic domain (semaphorin) 6A	1436458_at	20358	0	-5.05817	6865267	0.0171614	-1.61
Sema6d	NM_172537	sema domain transmembrane domain (TM) and cytoplasmic domain (semaphorin) 6D	1453055_at	214968	0.0001	-3.20307	6880776	0.0120904	-2.01
Sept4	NM_011129	septin 4	1455422_x_at	18952	0.0001	-3.95257	6783321	0.0111476	-1.81
Serinc2	NM_172702	serine incorporator 2	1434382_at	230779	0	4.1079	6925654	4.83645e-05	2.31
Serpina3c	NM_008458	serine (or cysteine) peptidase inhibitor clade A member 3C	1421564_at	16625	0.0001	-10.2987	6803284	0.00774819	-1.71
Serping1	NM_009776	serine (or cysteine) peptidase inhibitor clade G member 1	1416625_at	12258	0	-2.27739	6888324	0.000115503	-1.61
Sesn3	NM_030261	sestrin 3	1449303_at	75747	0	2.5335	6987065	1.23126e-05	1.71
Sfxn1	NM_027324	sideroflexin 1	1417560_at	14057	0	3.2155	6807154	0.000215316	1.71
Sfxn4	NM_053198	sideroflexin 4	1418873_at	94281	0.0097	-2.05804	6874214	0.00207033	-1.51
Sgcb	NM_011890	sarcoglycan beta (dystrophin-associated glycoprotein)	1436678_at	24051	0.0016	-3.19387	6939153	0.000845843	-1.61
Sgce	NM_011360	sarcoglycan epsilon	1420688_a_at	20392	0.0002	-2.01045	6951352	0.000135395	-1.51
Sgip1	NM_144906	SH3-domain GRB2-like (endophilin) interacting protein 1	1425180_at	73094	0.0003	-5.97372	6915871	0.014753	-1.61
Sgms1	NM_144792	sphingomyelin synthase 1	1436499_at	208449	0	2.2601	6872651	0.0124021	1.21
Sgpp2	NM_001004173	sphingosine-1-phosphate phosphotase 2	1457867_at	433323	0.0001	3.076	6750848	5.3913e-06	1.91
Sgtb	NM_144838	small glutamine-rich tetratricopeptide repeat (TPR)-containing beta	1437977_at	218544	0	-2.90782	6809806	0.00036514	-1.81
Sh2d3c	NM_013781	SH2 domain containing 3C	1415886_at	27387	0.0001	-2.47097	6876217	0.00065682	-2.11
Sh3bp5	NM_011894	SH3-domain binding protein 5 (BTK-associated)	1421922_at	24056	0.0025	-3.97772	6823721	0.046441	-1.41
Sh3d19	D89677	SH3 domain protein D19	1418461_at	27059	0	2.1104	6898940	0.0102289	1.31
Sh3gl2	NM_019535	SH3-domain GRB2-like 2	1418791_at	20404	0.0183	-4.84027	6915070	0.00496029	-1.41
Sh3glb1	NM_019464	SH3-domain GRB2-like B1 (endophilin)	1418011_a_at	54673	0.0021	-2.22222	6910122	0.0289626	-1.41
Sh3kbp1	NM_021389	SH3-domain kinase binding protein 1	1460337_at	58194	0	-2.09161	7014836	0.0245772	-1.21
Sh3pxd2b	NM_177364	SH3 and PX domains 2B	1435644_at	268396	0	2.7383	6779843	5.235e-05	1.81
Sh3tc2	NM_172628	SH3 domain and tetratricopeptide repeats 2	1456020_at	225608	0.0044	-4.50248	6861408	0.000874496	-1.71
Shank3	NM_021423	SH3/ankyrin domain gene 3	1419137_at	58234	0	-3.06748	6832587	0.00329264	-1.61
She	NM_172530	src homology 2 domain-containing transforming protein E	1438227_at	214547	0	-4.35161	6899277	0.00876721	-1.51
Shmt1	NM_009171	serine hydroxymethyltransferase 1 (soluble)	1425177_at	20425	0	4.821	6788791	6.12359e-05	2.41
Sipa1	NM_011379	signal-induced proliferation associated gene 1	1416206_at	20469	0	-3.48068	6871134	0.000601335	-1.81
Sipa1l1	NM_172579	signal-induced proliferation-associated 1 like 1	1434222_at	217692	0.0006	-2.04499	6796492	0.00781415	-1.81
Slc12a2	NM_009194	solute carrier family 12 member 2	1417622_at	20496	0	3.3623	6861200	4.75164e-10	2.81
Slc12a5	NM_020333	solute carrier family 12 member 5	1451674_at	57138	0	-3.71885	6883127	0.000222671	-1.31
Slc12a6	NM_133649	solute carrier family 12 member 6	1436989_s_at	107723	0.0001	-3.05437	6880035	0.0130314	-1.31
Slc13a3	NM_054055	solute carrier family 13 (sodium-dependent dicarboxylate transporter) member 3	1438377_x_at	114644	0.0015	-2.09952	6893002	0.000331774	-1.31
Slc13a4	NM_172892	solute carrier family 13 (sodium/sulfate symporters) member 4	1433734_at	243755	0.0085	-9.61538	6952679	0.000120084	-1.31
Slc15a1	NM_053079	solute carrier family 15 (oligopeptide transporter) member 1	1419343_at	56643	0.0007	2.6676	6827924	0.00792294	1.51
Slc15a2	NM_021301	solute carrier family 15 (H+/peptide transporter) member 2	1417600_at	57738	0.0009	3.533	6845444	1.83788e-05	3.01
Slc16a6	NM_134038	solute carrier family 16 (monocarboxylic acid transporters) member 6	1417884_at	104681	0	4.1262	6792097	1.30627e-05	1.91
Slc16a9	NM_025807	solute carrier family 16 (monocarboxylic acid transporters) member 9	1429727_at	66859	0.0001	-3.83142	6768618	0.00291139	-2.31
Slc22a3	NM_011395	solute carrier family 22 (organic cation transporter) member 3	1420444_at	20519	0.0006	-5.13084	6853766	0.000736034	-1.51
Slc23a1	NM_011397	solute carrier family 23 (nucleobase transporters) member 1	1421912_at	20522	0	3.0508	6864593	0.00995381	1.51
Slc23a3	NM_194333	solute carrier family 23 (nucleobase transporters) member 3	1460042_at	22626	0	15.8451	6759773	1.38826e-07	2.31
Slc24a3	NM_053195	solute carrier family 24 (sodium/potassium/calcium exchanger) member 3	1424308_at	94249	0	-3.69822	6881870	0.00930552	-1.31
Slc25a10	NM_013770	solute carrier family 25 (mitochondrial carrier dicarboxylate transporter) member 10	1416955_at	27376	0.0032	2.9555	6785446	0.00225624	2.11
Slc25a13	NM_015829	solute carrier family 25 (mitochondrial carrier adenine nucleotide translocator) member 13	1449481_at	50799	0.0029	2.8354	6951440	0.000733713	1.51
Slc25a32	NM_172402	solute carrier family 25 member 32	1435483_x_at	69906	0.003	-2.08638	6835149	0.00115107	-1.31
Slc25a37	NM_026331	solute carrier family 25 member 37	1417750_a_at	67712	0	2.293	6825638	0.012878	1.41
Slc26a4	NM_011867	solute carrier family 26 member 4	1419725_at	23985	0.0001	10.7974	6799842	1.17903e-06	5.81
Slc27a3	NM_011988	solute carrier family 27 (fatty acid transporter) member 3	1427180_at	26568	0.0077	-7.07214	6906893	0.00508446	-1.51
Slc29a1	NM_022880	solute carrier family 29 (nucleoside transporters) member 1	1451782_a_at	63959	0.011	-3.1348	6855615	2.09611e-06	-1.71
Slc2a12	NM_178934	solute carrier family 2 (facilitated glucose transporter) member 12	1435911_s_at	353169	0	-2.61849	6766491	0.00929156	-1.51
Slc2a13	NM_001033633	solute carrier family 2 (facilitated glucose transporter) member 13	1435387_at	239606	0.0002	-2.18007	6837941	0.00183683	-1.31
Slc2a3	NM_011401	solute carrier family 2 (facilitated glucose transporter) member 3	1437052_s_at	20527	0.0002	-3.64697	6957051	0.0127152	-1.51
Slc2a9	NM_145559	solute carrier family 2 (facilitated glucose transporter) member 9	1426568_at	117591	0.0003	-2.56937	6943641	0.00248637	-1.71
Slc36a2	NM_153170	solute carrier family 36 (proton/amino acid symporter) member 2	1436521_at	246049	0.0003	-3.90778	6788401	0.000242428	-2.01
Slc38a5	NM_172479	solute carrier family 38 member 5	1454622_at	209837	0.0001	-6.30517	7009834	0.000420287	-2.21
Slc39a11	NM_027216	solute carrier family 39 (metal ion transporter) member 11	1424905_a_at	69806	0	2.2754	6792296	0.0428179	1.21
Slc39a4	NM_028064	solute carrier family 39 (zinc transporter) member 4	1451139_at	72027	0.0001	2.2007	6836839	5.07e-05	1.51
Slc39a6	NM_139143	solute carrier family 39 (metal ion transporter) member 6	1424674_at	106957	0	-2.04332	6863973	0.000493945	-1.61
Slc43a3	NM_021398	solute carrier family 43 member 3	1422788_at	58207	0.0007	-4.28816	6878713	6.53906e-05	-2.01
Slc44a3	NM_145394	solute carrier family 44 member 3	1425109_at	213603	0	2.4215	6908775	0.00179653	1.61
Slc44a4	NM_023557	solute carrier family 44 member 4	1416596_at	70129	0	3.0351	6850077	0.0243652	2.11
Slc4a1	NM_011403	solute carrier family 4 (anion exchanger) member 1	1434502_x_at	20533	0.0005	-4.07664	6791561	0.00112123	-1.41
Slc4a4	NM_018760	solute carrier family 4 (anion exchanger) member 4	1434096_at	54403	0	2.5101	6932240	0.00439215	1.51
Slc6a2	NM_009209	solute carrier family 6 (neurotransmitter transporter noradrenalin) member 2	1460129_at	20538	0.0013	-3.79075	6978233	0.000633113	-1.81
Slc7a10	NM_017394	solute carrier family 7 (cationic amino acid transporter y+ system) member 10	1421093_at	53896	0.0001	-7.66871	6959800	0.000886499	-2.21
Slc7a5	NM_011404	solute carrier family 7 (cationic amino acid transporter y+ system) member 5	1418326_at	20539	0	2.516	6985900	0.00185001	1.41
Slfn1	NM_011407	schlafen 1	1418612_at	20555	0.0124	-2.63158	6782989	0.00428359	-1.31
Slfn2	NM_011408	schlafen 2	1450165_at	20556	0.0009	-2.62261	6782988	0.0243848	-1.31
Slfn4	NM_011410	schlafen 4	1427102_at	20558	0.0003	-5.8651	6783005	0.00181866	-1.31
Slfn5	NM_183201	schlafen 5	1456288_at	327978	0.0173	-3.61141	6782979	4.6739e-05	-2.41
Slit3	NM_011412	slit homolog 3 (Drosophila)	1452296_at	20564	0.0024	-5.44662	6779995	0.000630746	-1.81
Smad6	NM_008542	MAD homolog 6 (Drosophila)	1422771_at	17130	0.0013	-4.22119	6996263	0.00171648	-1.61
Smad7	NM_001042660	MAD homolog 7 (Drosophila)	1443771_x_at	17131	0.0005	-3.53607	6862133	0.000743229	-1.61
Smpdl3b	NM_133888	sphingomyelin phosphodiesterase acid-like 3B	1417300_at	100340	0.0001	-2.49377	6925829	0.000240439	-1.51
Smtn	NM_013870	smoothelin	1452469_a_at	29856	0.0013	-2.16544	6785609	0.0198846	-1.31
Smurf1	NM_029438	SMAD specific E3 ubiquitin protein ligase 1	1428396_at	75788	0.0002	14.1641	6942977	0.000122656	1.31
Snai2	NM_011415	snail homolog 2 (Drosophila)	1418673_at	20583	0.0051	-3.88954	6839624	0.000205373	-1.71
Sned1	NM_172463	sushi nidogen and EGF-like domains 1	1435603_at	208777	0.0002	-2.97708	6751684	0.00752797	-1.41
Snhg8	XM_619218	small nucleolar RNA host gene (non-protein coding) 8	1456204_at	66487	0.0001	-2.09293	6823707	0.00498818	-1.41
Snx7	NM_029655	sorting nexin 7	1428527_at	76561	0	3.4856	6908569	3.43418e-05	2.21
Sod3	NM_011435	superoxide dismutase 3 extracellular	1417633_at	20657	0	-3.23206	6930799	0.00154515	-2.71
Sorbs1	NM_178362	sorbin and SH3 domain containing 1	1436737_a_at	20411	0.0001	-4.33839	6873068	0.00212857	-1.71
Sorbs2	NM_172752	sorbin and SH3 domain containing 2	1437197_at	234214	0.0004	3.4418	6975861	6.52576e-05	1.81
Sorcs2	NM_030889	sortilin-related VPS10 domain containing receptor 2	1419358_at	81840	0	3.3377	6937466	3.77664e-05	1.81
Sox13	NM_011439	SRY-box containing gene 13	1450191_a_at	20668	0.0001	-3.07598	6762304	0.000873513	-1.61
Sox17	NM_011441	SRY-box containing gene 17	1429177_x_at	20671	0.0001	-3.62976	6756599	0.00909589	-1.81
Sox18	NM_009236	SRY-box containing gene 18	1449135_at	20672	0	-3.4459	6894310	6.78172e-07	-2.31
Sox7	NM_011446	SRY-box containing gene 7	1416564_at	20680	0	-3.97931	6819744	0.000842945	-2.61
Spc25	AK011893	SPC25 NDC80 kinetochore complex component homolog (S. cerevisiae)	1424118_a_at	66442	0	3.5804	6887520	0.000161567	1.61
Specc1l	NM_153406	SPECC1-like	1428300_at	74392	0	-2.44559	6768851	0.0112099	-1.71
Spg21	NM_138584	spastic paraplegia 21 homolog (human)	1451036_at	27965	0	3.0416	6989933	7.11319e-05	1.61
Spint1	AF099018	serine protease inhibitor Kunitz type 1	1416627_at	20732	0	5.3987	6880508	8.76909e-05	2.51
Spint2	NM_011464	serine protease inhibitor Kunitz type 2	1451935_a_at	20733	0	2.3606	6966198	5.62011e-06	1.71
Spn	NM_009259	sialophorin	1439034_at	20737	0.0008	-2.41313	6971326	0.000918261	-1.61
Spock2	NM_052994	sparc/osteonectin cwcv and kazal-like domains proteoglycan 2	1435026_at	94214	0	-5.35332	6768151	0.000543367	-2.11
Spon1	NM_145584	spondin 1 (f-spondin) extracellular matrix protein	1424415_s_at	233744	0.001	-4.78927	6963590	0.00153714	-2.01
Spred1	NM_033524	sprouty protein with EVH-1 domain 1 related sequence	1423161_s_at	114715	0.0002	2.2615	6880322	0.00031966	1.71
Srpx2	NM_026838	sushi-repeat-containing protein X-linked 2	1427919_at	68792	0.0001	-2.44499	7013837	0.00378814	-1.41
Sspn	NM_010656	sarcospan	1417644_at	16651	0.0018	-2.57136	6951054	0.0125132	-1.31
Ssx2ip	NM_138744	synovial sarcoma X breakpoint 2 interacting protein	1448743_at	99167	0.0001	2.4129	6902192	0.000434962	1.51
St14	NM_011176	suppression of tumorigenicity 14 (colon carcinoma)	1418076_at	19143	0	4.2805	6994353	4.19558e-05	2.41
St3gal2	NM_178048	ST3 beta-galactoside alpha-2 3-sialyltransferase 2	1421892_at	20444	0.0059	-3.35796	6979111	1.17106e-05	-1.81
St8sia4	AK003690	ST8 alpha-N-acetyl-neuraminide alpha-2 8-sialyltransferase 4	1419186_a_at	20452	0.0005	-2.82087	6760847	0.0216662	-2.11
St8sia6	NM_145838	ST8 alpha-N-acetyl-neuraminide alpha-2 8-sialyltransferase 6	1456147_at	241230	0	41.7137	6884820	5.96401e-07	11.01
Stab1	NM_138672	stabilin 1	1450199_a_at	192187	0	-3.20821	6823709	0.00284524	-1.81
Stard10	NM_019990	START domain containing 10	1448956_at	56018	0	3.4455	6963003	0.000544107	2.41
Stard9	AK138464	START domain containing 9	1436324_at	668880	0.0001	-6.07903	6880594	0.00690424	-2.21
Stat4	NM_011487	signal transducer and activator of transcription 4	1448713_at	20849	0.0016	-2.11416	6749392	0.00496465	-1.31
Stk39	NM_016866	serine/threonine kinase 39 STE20/SPS1 homolog (yeast)	1419550_a_at	53416	0.0001	12.7726	6887450	1.6717e-06	2.41
Stmn2	NM_025285	stathmin-like 2	1423281_at	20257	0	-5.50055	6895589	1.93023e-05	-3.11
Stox1	XM_125685	storkhead box 1	1456883_at	216021	0	-4.39754	6774407	0.000213847	-1.31
Stox2	NM_175162	storkhead box 2	1447624_s_at	71069	0	-2.18103	6982214	0.0315628	-1.21
Strbp	NM_009261	spermatid perinuclear RNA binding protein	1452061_s_at	20744	0.0004	3.1112	6886117	0.000856942	1.21
Stx11	AK171663	syntaxin 11	1453228_at	74732	0.0002	-2.36183	6772195	0.00608799	-1.41
Stxbp1	NM_009295	syntaxin binding protein 1	1420505_a_at	20910	0	-2.68097	6885912	0.00253512	-1.61
Stxbp2	NM_011503	syntaxin binding protein 2	1437048_x_at	20911	0	2.3348	6973689	2.50533e-06	1.61
Stxbp6	NM_144552	syntaxin binding protein 6 (amisyn)	1435396_at	217517	0	-3.93236	6800468	0.0146003	-1.11
Sult2b1	NM_017465	sulfotransferase family cytosolic 2B member 1	1417335_at	54200	0.0002	13.577	6967006	0.000151416	2.31
Svep1	NM_022814	sushi von Willebrand factor type A EGF and pentraxin domain containing 1	1419182_at	64817	0.0001	-3.77216	6921994	0.000629122	-1.91
Syde1	AK192739	synapse defective 1 Rho GTPase homolog 1 (C. elegans)	1431798_a_at	71709	0	-2.02799	6775272	0.0182055	-1.61
Syn2	NM_013681	synapsin II	1428460_at	20965	0.0001	-2.35294	6949191	0.00437025	-1.11
Syne1	NM_001079686	synaptic nuclear envelope 1	1455493_at	64009	0.0001	-3.42936	6765551	0.0416238	-1.51
Synpo2	AK035258	synaptopodin 2	1452879_at	118449	0.0001	-3.66703	6908927	0.000343552	-1.61
Syt12	NM_134164	synaptotagmin XII	1422878_at	171180	0	7.8383	6871004	0.000278221	2.01
Sytl1	NM_031393	synaptotagmin-like 1	1450240_a_at	269589	0.007	2.8958	6925878	0.048541	1.41
Tacstd1	NM_008532	tumor-associated calcium signal transducer 1	1416579_a_at	17075	0	4.8069	6852882	0.000132018	2.81
Tacstd2	NM_020047	tumor-associated calcium signal transducer 2	1423323_at	56753	0	3.0979	6954425	0.00564682	2.01
Tagln	NM_011526	transgelin	1423505_at	21345	0.0029	-2.49501	6995258	0.0103558	-1.81
Tal1	NM_011527	T-cell acute lymphocytic leukemia 1	1449389_at	21349	0	-3.28299	6916487	1.85249e-05	-1.51
Tanc2	NM_181071	tetratricopeptide repeat ankyrin repeat and coiled-coil containing 2	1435078_at	77097	0.0001	2.9323	6784578	8.92199e-09	2.01
Taok3	NM_001081308	TAO kinase 3	1435964_a_at	330177	0.001	3.0754	6933784	0.000318494	2.01
Tbc1d2	NM_198664	TBC1 domain family member 2	1456792_at	381605	0	2.8156	6921382	0.000789188	1.41
Tbkbp1	NM_198100	TBK1 binding protein 1	1435183_at	73174	0.0001	-2.09468	6791174	0.0486357	-1.41
Tbx2	NM_009324	T-box 2	1422545_at	21385	0.0001	-3.22685	6783204	0.00154972	-2.31
Tbx3	NM_011535	T-box 3	1445757_at	21386	0.0244	-6.11621	6933913	0.0015211	-1.91
Tbx4	NM_011536	T-box 4	1456033_at	21387	0	-2.76014	6783225	0.000785515	-1.61
Tbxa2r	NM_009325	thromboxane A2 receptor	1419222_at	21390	0	-2.21141	6769282	0.00169884	-1.41
Tcf21	NM_011545	transcription factor 21	1417447_at	21412	0.0002	-7.49064	6772723	0.000660631	-3.31
Tcf7	X61385	transcription factor 7 T-cell specific	1433471_at	21414	0.0005	-2.01167	6788172	0.00437219	-1.71
Tcfcp2l1	AK143960	transcription factor CP2-like 1	1418091_at	81879	0.0002	3.1389	6752425	5.33053e-06	2.01
Tek	NM_013690	endothelial-specific receptor tyrosine kinase	1418788_at	21687	0.0001	-5.10204	6915506	0.00903229	-2.31
Tes	NM_207176	testis derived transcript	1460378_a_at	21753	0.0006	2.5219	6944351	0.00482474	1.41
Tex11	NM_031384	testis expressed gene 11	1419729_at	83558	0.0005	-3.4626	7018522	0.00437072	-2.01
Tfpi	NM_011576	tissue factor pathway inhibitor	1438530_at	21788	0.0003	-3.0931	6888299	0.00293639	-1.81
Tgfb1i1	NM_009365	transforming growth factor beta 1 induced transcript 1	1418136_at	21804	0.0001	-2.12404	6964394	0.000984092	-1.51
Tgfb2	NM_009367	transforming growth factor beta 2	1438303_at	21808	0.0123	-2.21043	6764953	0.00027076	-1.31
Tgfbr3	NM_011578	transforming growth factor beta receptor III	1433795_at	21814	0.0001	-2.145	6940841	0.00319965	-1.91
Tgif1	NM_009372	TG interacting factor 1	1422286_a_at	21815	0	3.8329	6857022	0.000744909	1.41
Tgm1	NM_019984	transglutaminase 1 K polypeptide	1451416_a_at	21816	0	4.3704	6824838	7.07925e-05	2.51
Tgoln1	NM_009443	trans-golgi network protein	1423307_s_at	22134	0	2.8499	6954638	0.000339617	2.01
Tgtp	NM_011579	T-cell specific GTPase	1449009_at	21822	0.0039	-2.13858	6787909	0.000342054	-1.41
Thbd	NM_009378	thrombomodulin	1448529_at	21824	0.0001	-3.54359	6891879	0.000215571	-1.81
Thsd1	NM_019576	thrombospondin type I domain 1	1418205_at	56229	0	-3.0175	6974611	0.00639018	-1.71
Thsd4	NM_001040426	thrombospondin type I domain containing 4	1455262_at	207596	0	3.0426	6996124	2.08363e-07	1.71
Tie1	NM_011587	tyrosine kinase receptor 1	1416238_at	21846	0	-4.21053	6924894	0.000393256	-2.51
Tjp3	NM_013769	tight junction protein 3	1417896_at	27375	0	2.6898	6775451	0.000635808	1.51
Tk1	NM_009387	thymidine kinase 1	1416258_at	21877	0	3.8921	6792601	0.00079321	1.41
Tle4	NM_011600	transducin-like enhancer of split 4 homolog of Drosophila E(spl)	1450853_at	21888	0	-2.5974	6871700	0.00177994	-1.51
Tlr4	NM_021297	toll-like receptor 4	1418162_at	21898	0	2.2844	6914190	2.0519e-05	1.61
Tm4sf1	NM_008536	transmembrane 4 superfamily member 1	1439925_at	17112	0.0004	-4.81696	6905289	0.0216738	-1.41
Tmc4	NM_181820	transmembrane channel-like gene family 4	1427178_at	353499	0	5.0943	6973479	0.000532636	2.21
Tmcc2	NM_178874	transmembrane and coiled-coil domains 2	1452666_a_at	68875	0.0005	-5.29661	6762217	0.00103617	-1.61
Tmcc3	NM_172051	transmembrane and coiled coil domains 3	1451794_at	319880	0.0065	-4.5977	6769928	0.00802942	-1.21
Tmeff1	NM_021436	transmembrane protein with EGF-like and two follistatin-like domains 1	1426649_at	230157	0	-4.1511	6913348	0.00656334	-1.61
Tmeff2	NM_019790	transmembrane protein with EGF-like and two follistatin-like domains 2	1419073_at	56363	0.0005	-4.90918	6749346	5.60367e-05	-2.01
Tmem100	NM_026433	transmembrane protein 100	1449533_at	67888	0.0001	-6.37349	6783484	0.000269416	-2.61
Tmem116	NM_029912	transmembrane protein 116	1425318_a_at	77462	0	2.359	6934061	0.000218504	1.71
Tmem135	NM_028343	transmembrane protein 135	1426435_at	72759	0	2.206	6969196	3.71448e-05	1.11
Tmem139	BC096053	transmembrane protein 139	1436556_at	109218	0	4.1756	6945776	7.37475e-05	2.11
Tmem140	BC020080	transmembrane protein 140	1424354_at	68487	0	-2.77162	6945339	0.00256979	-1.71
Tmem163	NM_028135	transmembrane protein 163	1428077_at	72160	0	2.7088	6761964	0.000288987	1.61
Tmem16a	NM_178642	transmembrane protein 16A	1459713_s_at	101772	0	2.4285	6972473	0.000140533	1.71
Tmem178	NM_026516	transmembrane protein 178	1429175_at	68027	0.0001	-2.72777	6852542	0.00236451	-1.61
Tmem180	NM_029186	transmembrane protein 180	1438561_x_at	75146	0.0004	2.6484	6870068	0.000101941	1.71
Tmem2	NM_031997	transmembrane protein 2	1445918_at	83921	0.0121	-3.08071	6868650	0.00507357	-1.61
Tmem42	NM_025339	transmembrane protein 42	1421127_at	66079	0.0001	2.6641	6993099	0.00174808	1.41
Tmem44	NM_172614	transmembrane protein 44	1455044_at	224090	0	-4.23012	6845042	0.000961879	-1.81
Tmem45a	NM_019631	transmembrane protein 45a	1422587_at	56277	0	-2.73523	6846440	0.000590034	-1.71
Tmem46	NM_145463	transmembrane protein 46	1423852_at	219134	0.0013	-4.19815	6819511	0.00833033	-1.01
Tmem47	NM_175771	transmembrane protein 47	1420514_at	192216	0.0003	-4.93583	7012265	0.00170938	-2.21
Tmem49	NM_029478	transmembrane protein 49	1423722_at	75909	0	2.678	6790508	0.000175649	1.41
Tmem62	NM_175285	transmembrane protein 62	1455350_at	96957	0	2.4803	6880623	0.000586585	2.11
Tmem71	NM_172514	transmembrane protein 71	1436212_at	213068	0	-3.65497	6836325	0.00247463	-2.21
Tmod2	NM_001038710	tropomodulin 2	1435060_at	50876	0	-5.46448	6996952	0.00069702	-2.31
Tmprss4	NM_145403	transmembrane protease serine 4	1426302_at	214523	0	2.2026	6995177	0.000537104	1.31
Tmtc1	NM_198967	transmembrane and tetratricopeptide repeat containing 1	1439855_at	387314	0.0017	-2.44021	6958407	0.00126071	-1.81
Tnfrsf12a	NM_013749	tumor necrosis factor receptor superfamily member 12a	1418572_x_at	27279	0.0001	3.8459	6854260	0.00584374	2.01
Tnfrsf19	NM_013869	tumor necrosis factor receptor superfamily member 19	1448147_at	29820	0	-5.12033	6825192	0.00534986	-1.81
Tnfrsf21	NM_178589	tumor necrosis factor receptor superfamily member 21	1422740_at	94185	0.0001	4.1754	6850502	3.08388e-05	3.51
Tnfsf10	NM_009425	tumor necrosis factor (ligand) superfamily member 10	1439680_at	22035	0	-4.58295	6896353	0.00126984	-2.51
Tnfsf13b	NM_033622	tumor necrosis factor (ligand) superfamily member 13b	1460255_at	24099	0	-2.19491	6973937	0.000315152	-1.71
Tnfsf9	NM_009404	tumor necrosis factor (ligand) superfamily member 9	1422924_at	21950	0	15.6783	6851309	0.00135993	2.91
Tnik	AK122306	TRAF2 and NCK interacting kinase	1455256_at	665113	0.0001	-4.11862	6896424	0.00268731	-1.81
Tnk1	NM_031880	tyrosine kinase non-receptor 1	1422721_at	83813	0	2.3204	6789355	0.00443428	1.21
Tnxb	NM_031176	tenascin XB	1450798_at	81877	0.0002	-3.2352	6850066	0.00053628	-1.91
Tom1l1	NM_028011	target of myb1-like 1 (chicken)	1451117_a_at	71943	0	4.02	6790774	1.72623e-06	2.01
Top2a	NM_011623	topoisomerase (DNA) II alpha	1454694_a_at	21973	0	2.6485	6791298	7.42583e-05	2.01
Tox	NM_145711	thymocyte selection-associated HMG box gene	1442039_at	252838	0.0001	3.0678	6919417	6.86833e-05	1.41
Tox3	NM_172913	TOX high mobility group box family member 3	1436600_at	244579	0.0007	-3.23102	6984156	0.00991908	-1.31
Tpcn1	NM_145853	two pore channel 1	1434930_at	252972	0	-2.24115	6941637	7.27105e-05	-1.91
Tpcn2	NM_146206	two pore segment channel 2	1424304_at	233979	0.0004	2.4416	6972501	0.000271038	1.41
Tpd52	NM_001025262	tumor protein D52	1419493_a_at	21985	0	2.2556	6903099	3.40046e-05	1.21
Tpst1	NM_013837	protein-tyrosine sulfotransferase 1	1421733_a_at	22021	0	-3.64697	6934652	0.00094964	-2.11
Tpx2	NM_028109	TPX2 microtubule-associated protein homolog (Xenopus laevis)	1428104_at	72119	0.0008	2.5003	6882333	2.52982e-06	1.61
Traf4	NM_009423	Tnf receptor associated factor 4	1460642_at	22032	0.0001	3.2042	6789939	0.000168563	1.71
Traf5	NM_011633	Tnf receptor-associated factor 5	1448861_at	22033	0	-2.07039	6765275	0.00101993	-1.41
Treml4	NM_001033922	triggering receptor expressed on myeloid cells-like 4	1460014_at	224840	0.0005	-7.1582	6850821	6.4308e-06	-1.91
Trib2	NM_144551	tribbles homolog 2 (Drosophila)	1426640_s_at	217410	0	-3.03674	6799173	1.59249e-05	-1.81
Trim16	NM_053169	tripartite motif protein 16	1460629_at	94092	0.0001	-2.0842	6781605	0.0144705	-1.51
Trim37	NM_197987	tripartite motif protein 37	1436394_at	68729	0	-2.49626	6783297	0.0488518	1.31
Trip13	NM_027182	thyroid hormone receptor interactor 13	1429295_s_at	69716	0	2.4835	6814364	8.63743e-05	1.51
Trpc1	NM_011643	transient receptor potential cation channel subfamily C member 1	1421096_at	22063	0.0001	-4.54545	6998020	0.00124968	-1.71
Trpc3	NM_019510	transient receptor potential cation channel subfamily C member 3	1417577_at	22065	0.0001	-3.10559	6904303	0.000807167	-1.71
Trpc6	NM_013838	transient receptor potential cation channel subfamily C member 6	1449431_at	22068	0.0002	-2.3359	6986775	0.00114582	-1.51
Tspan1	NM_133681	tetraspanin 1	1417958_at	66805	0	5.6755	6924770	0.0123213	3.81
Tspan11	NM_026743	tetraspanin 11	1436626_at	68498	0	3.8428	6950030	1.44607e-05	2.91
Tspan12	NM_173007	tetraspanin 12	1454604_s_at	269831	0.0007	-3.67647	6952070	0.000268978	-1.41
Tspan13	NM_025359	tetraspanin 13	1460239_at	66109	0.0001	-3.47222	6800079	0.012777	-1.41
Tspan18	NM_183180	tetraspanin 18	1442174_at	241556	0	-4.52489	6894353	0.002599	-2.61
Tspan3	NM_019793	tetraspanin 3	1416009_at	56434	0.0002	-2.12089	6995825	0.0134998	-1.81
Tspan32	NM_020286	tetraspanin 32	1418398_a_at	27027	0.0069	-2.51826	6965314	0.00140701	-1.11
Tspan6	NM_019656	tetraspanin 6	1448501_at	56496	0	-2.81136	7021014	0.000127855	-1.81
Tspan7	NM_019634	tetraspanin 7	1417502_at	21912	0.0001	-5.79039	7021194	0.000209589	-2.31
Tspan8	NM_146010	tetraspanin 8	1424649_a_at	216350	0	2.1274	6770901	3.90538e-05	1.51
Tsr1	NM_177325	TSR1 20S rRNA accumulation homolog (yeast)	1433502_s_at	104662	0	2.0752	6782411	0.00190441	1.31
Ttc28	AK122427	tetratricopeptide repeat domain 28	1449520_at	209683	0.0001	-3.12695	6933474	0.00485952	-1.61
Ttc7	NM_028639	tetratricopeptide repeat domain 7	1435334_at	225049	0	2.646	6852874	1.25618e-05	1.41
Ttc7b	XM_975837	tetratricopeptide repeat domain 7B	1433460_at	104718	0	-3.03951	6803098	0.00155257	-1.71
Ttc9	NM_001033149	tetratricopeptide repeat domain 9	1455649_at	69480	0	4.3329	6796466	1.32284e-05	2.51
Ttyh3	NM_175274	tweety homolog 3 (Drosophila)	1454978_at	78339	0.0047	-2.16029	6942737	0.00395698	-1.51
Tubb4	NM_009451	tubulin beta 4	1423221_at	22153	0	-5.18403	6856279	0.00252876	-2.21
Tusc5	NM_177709	tumor suppressor candidate 5	1441096_at	237858	0.0019	-3.70096	6782533	0.00016415	-2.01
Tyki	L32973	thymidylate kinase family LPS-inducible member	1450484_a_at	22169	0.0001	-3.4904	6793961	0.00895402	-1.31
Tyms	BC020139	thymidylate synthase	1424991_s_at	22171	0	2.7581	6936981	1.45665e-05	1.41
Ube2c	NM_026785	ubiquitin-conjugating enzyme E2C	1452954_at	68612	0	4.7786	6883114	0.00435657	1.71
Ube2l6	NM_019949	ubiquitin-conjugating enzyme E2L 6	1417172_at	56791	0.0002	-2.55232	6878709	0.00320248	-1.51
Uhrf1	NM_010931	ubiquitin-like containing PHD and RING finger domains 1	1415810_at	18140	0.0001	3.1652	6851232	0.000140469	1.81
Unc45b	NM_178680	unc-45 homolog B (C. elegans)	1436939_at	217012	0.0001	-3.94477	6782977	0.00138243	-1.61
Unc5c	NM_009472	unc-5 homolog C (C. elegans)	1449522_at	22253	0.0002	-4.1684	6901898	0.000579078	-1.71
Upk1b	NM_178924	uroplakin 1B	1435831_at	22268	0	-6.69344	6845587	0.000555423	-2.61
Upk3b	NM_175309	uroplakin 3B	1454881_s_at	100647	0.0007	-7.02247	6934969	0.00335087	-1.81
Ushbp1	NM_181418	Usher syndrome 1C binding protein 1	1451500_at	234395	0	-3.4626	6983250	0.0144756	-1.61
Usp18	XM_978933	ubiquitin specific peptidase 18	1418191_at	24110	0.0005	-2.06313	6949588	0.00529041	-1.31
Vamp2	NM_009497	vesicle-associated membrane protein 2	1420834_at	22318	0.0001	-2.01126	6781982	0.0222657	-1.31
Vars2	NM_175137	valyl-tRNA synthetase 2 mitochondrial (putative)	1434349_at	68915	0.0002	2.2085	6855121	1.23335e-05	1.51
Vav3	NM_146139	vav 3 oncogene	1417122_at	57257	0.0004	-3.61011	6900456	0.0124253	-1.51
Vcan	AK032794	versican	1427256_at	13003	0.0001	2.2637	6814956	0.00142749	1.31
Vcl	NM_009502	vinculin	1416156_at	22330	0	-2.20653	6817393	0.0259603	-1.51
Vegfc	NM_009506	vascular endothelial growth factor C	1439766_x_at	22341	0.0003	-4.02739	6976200	0.00129324	-1.61
Vezf1	NM_016686	vascular endothelial zinc finger 1	1429084_at	22344	0.001	-2.06954	6783360	0.00136103	-1.61
Vgll3	AK007165	vestigial like 3 (Drosophila)	1430596_s_at	73569	0	-6.11247	6842129	0.00332097	-1.61
Vill	NM_011700	villin-like	1426022_a_at	22351	0	4.9317	6992866	0.000154221	2.41
Vsnl1	NM_012038	visinin-like 1	1420955_at	26950	0.0001	-6.37349	6798951	0.000794117	-1.41
Vtn	NM_011707	vitronectin	1455098_a_at	22370	0	-6.72043	6782702	6.92941e-05	-2.01
Vwf	NM_011708	Von Willebrand factor homolog	1435386_at	22371	0.0001	-3.50877	6949884	0.000933054	-2.01
Wasf3	NM_145155	WAS protein family member 3	1455722_at	245880	0	-4.29185	6935534	0.0072494	-1.41
Wdfy1	NM_027057	WD repeat and FYVE domain containing 1	1437358_at	69368	0	2.0913	6760006	1.54685e-06	1.51
Wdr16	NM_027963	WD repeat domain 16	1429552_at	71860	0.0002	6.7498	6789167	0.0469152	1.61
Wdr6	NM_031392	WD repeat domain 6	1415770_at	83669	0	2.6808	6998706	0.0033897	1.51
Wdr77	NM_027432	WD repeat domain 77	1422844_a_at	70465	0	2.4431	6900236	0.000101448	1.71
Wisp2	NM_016873	WNT1 inducible signaling pathway protein 2	1419015_at	22403	0	-3.16256	6883055	0.000372724	-1.51
Wnk4	NM_175638	WNK lysine deficient protein kinase 4	1427196_at	69847	0	6.6404	6784254	4.61108e-06	2.11
Wnt2	NM_023653	wingless-related MMTV integration site 2	1449425_at	22413	0.0001	-7.59878	6951974	0.00229077	-2.41
Wscd1	NM_177618	WSC domain containing 1	1455845_at	216881	0	-5.19211	6782201	0.000876486	-1.81
X99384	NM_013753	cDNA sequence X99384	1448134_at	27355	0	-2.11954	6774343	0.017682	-1.31
Xpnpep2	NM_178074	X-prolyl aminopeptidase (aminopeptidase P) 2 membrane-bound	1417805_at	170745	0	-3.36361	7011033	0.00023514	-2.51
Xrcc5	NM_009533	X-ray repair complementing defective repair in Chinese hamster cells 5	1451968_at	22596	0	2.0811	6750413	0.000521109	1.41
Zdhhc14	NM_146073	zinc finger DHHC domain containing 14	1438975_x_at	224454	0.001	-3.20513	6848479	0.00647065	-1.41
Zdhhc3	NM_026917	zinc finger DHHC domain containing 3	1423646_at	69035	0	2.275	6999642	0.000380147	1.81
Zeb1	NM_011546	zinc finger E-box binding homeobox 1	1418926_at	21417	0	-3.64431	6858575	0.0193372	-1.31
Zfp287	AK133603	zinc finger protein 287	1436220_at	170740	0.0004	-2.75103	6788928	0.00842154	-1.41
Zfp346	NM_012017	zinc finger protein 346	1417088_at	26919	0.0001	-2.01248	6807209	0.00724231	-1.51
Zfp354c	NM_013922	zinc finger protein 354C	1439044_at	30944	0.0128	-2.06016	6788054	6.76516e-05	-1.61
Zfp365	NM_178679	zinc finger protein 365	1433583_at	216049	0.0001	-3.87447	6774704	0.0400987	-1.11
Zfp7	NM_145916	zinc finger protein 7	1451323_at	223669	0	2.4769	7016538	0.000195549	1.51
Zyx	NM_011777	zyxin	1417240_at	22793	0	-2.37023	6945786	0.00206849	-1.21
