# Supplementary material for: A Cross-Platform Comparison of Genome-Wide Expression Changes of Laser Microdissected Lung Tissue of C-Raf Transgenic Mice Using 3′IVT and Exon Array
Source: PLoS One. 2012 Jul 16;7(7):e40778. doi: 10.1371/journal.pone.0040778 (PMC3397940; doi:10.1371/journal.pone.0040778)
Supplement: File S14 — List of common genes found when same platform of ArrayTrack software used for comparison between 3′IVT and exon array for comparing groups dysplasia vs non-transgenic. For 3′IVT array differential gene expression fold change obtained with parameters as false detection rate (FDR) of <0.001, fold change of ≥2, mean channel intensity (MCI) of 100, bad flag of 5. For exon array differential gene expression fold change obtained at core probeset level with parameters as false detection rate (FDR) of <0.05, mean channel intensity (MCI) of 100, bad flag of 4. (XLS) [file pone.0040778.s019.xls]

## Sheet: Sheet1
Gene symbol	NCBI annotation	gene discription	GEN_ID_MFR 3'IVT	LOCUSID 3'IVT	p value 3'IVT	fold change 3'IVT array	p value exon array for gene expression	fold change exon array_core probeset level by ArrayTrack
2310016C08Rik	NM_023516	Mus musculus RIKEN cDNA 2310016C08 gene (2310016C08Rik), mRNA.	1421031_a_at	69573	0	-6.43915	0.0013	-2.84091
3110049J23Rik	NM_026085	Mus musculus RIKEN cDNA 3110049J23 gene (3110049J23Rik), mRNA.	1449462_at	67307	0	10.3338	0	1.8232
Acsl4	NM_207625	Mus musculus acyl-CoA synthetase long-chain family member 4 (Acsl4), transcript variant 1, mRNA.	1451828_a_at	50790	0	6.4433	0.0001	2.3209
Adcyap1	NM_009625	Mus musculus adenylate cyclase activating polypeptide 1 (Adcyap1), mRNA.	1441778_at	11516	0.0006	41.1874	0.0001	4.3824
Adora1	NM_001008533	Mus musculus adenosine A1 receptor (Adora1), transcript variant 1, mRNA.	1435495_at	11539	0	7.3875	0.0014	1.9065
Adssl1	NM_007421	Mus musculus adenylosuccinate synthetase like 1 (Adssl1), mRNA.	1449383_at	11565	0	6.8574	0.0001	2.936
Akr1b8	NM_008012	Mus musculus aldo-keto reductase family 1, member B8 (Akr1b8), mRNA.	1448894_at	14187	0	6.756	0	2.8355
Akr1c19	NM_001013785	Mus musculus aldo-keto reductase family 1, member C19 (Akr1c19), mRNA.	1455454_at	432720	0.0002	5.9452	0.0001	2.1639
Ankrd22	NM_024204	Mus musculus ankyrin repeat domain 22 (Ankrd22), mRNA.	1453239_a_at	52024	0	47.3754	0.0009	6.3284
Ankrd38	NM_172872	Mus musculus ankyrin repeat domain 38 (Ankrd38), mRNA.	1436425_at	242553	0.0002	-5.66893	0.0029	-2.02102
Aqp3	NM_016689	Mus musculus aquaporin 3 (Aqp3), mRNA.	1450460_at	11828	0	5.9217	0.0007	1.952
Areg	NM_009704	Mus musculus amphiregulin (Areg), mRNA.	1421134_at	11839	0	35.6302	0	7.5908
Arg2	NM_009705	Mus musculus arginase type II (Arg2), mRNA.	1418847_at	11847	0	10.0437	0.0017	2.9865
Atp13a4	NM_172613	Mus musculus ATPase type 13A4 (Atp13a4), mRNA.	1438707_at	224079	0	25.3452	0	9.986
Atp6v0a1	NM_016920	Mus musculus ATPase, H+ transporting, lysosomal V0 subunit A1 (Atp6v0a1), mRNA.	1425227_a_at	11975	0	4.2371	0.0003	1.7513
Atp6v0a4	NM_080467	Mus musculus ATPase, H+ transporting, lysosomal V0 subunit A4 (Atp6v0a4), mRNA.	1422030_at	140494	0.0011	16.9188	0.0004	5.2717
Azin1	NM_018745	Mus musculus antizyme inhibitor 1 (Azin1), mRNA.	1450714_at	54375	0	3.9199	0	2.4675
B4galt6	NM_019737	Mus musculus UDP-Gal:betaGlcNAc beta 1,4-galactosyltransferase, polypeptide 6 (B4galt6), mRNA.	1460329_at	56386	0	6.2701	0.0007	3.8703
BC048546	NM_001001179	Mus musculus cDNA sequence BC048546 (BC048546), mRNA.	1436503_at	232400	0	28.4618	0.0037	3.1484
Cbln1	NM_019626	Mus musculus cerebellin 1 precursor protein (Cbln1), mRNA.	1423288_s_at	12404	0	12.3341	0.0008	7.3485
Cd177	NM_026862	Mus musculus CD177 antigen (Cd177), mRNA.	1424509_at	68891	0	37.2123	0	5.1755
Celsr1	NM_009886	Mus musculus cadherin EGF LAG seven-pass G-type receptor 1 (Celsr1), mRNA.	1418925_at	12614	0	5.526	0.0002	2.6005
Cep55	NM_028760	Mus musculus centrosomal protein 55 (Cep55), mRNA.	1452242_at	74107	0	4.8404	0.0038	1.992
Cftr	NM_021050	Mus musculus cystic fibrosis transmembrane conductance regulator homolog (Cftr), mRNA.	1420579_s_at	12638	0	-6.19579	0.0003	-2.28938
Chia	NM_023186	Mus musculus chitinase, acidic (Chia), mRNA.	1416456_a_at	81600	0	6.3827	0.001	9.0076
Chl1	NM_007697	Mus musculus cell adhesion molecule with homology to L1CAM (Chl1), mRNA.	1435190_at	12661	0.0013	30.539	0.0024	4.1709
Chrdl1	NM_031258	Mus musculus chordin-like 1 (Chrdl1), mRNA.	1434201_at	83453	0.0002	-10.4603	0.0031	-2.04708
Chst1	NM_023850	Mus musculus carbohydrate (keratan sulfate Gal-6) sulfotransferase 1 (Chst1), mRNA.	1449147_at	76969	0	-6.57895	0.0006	-1.94326
Cideb	NM_009894	Mus musculus cell death-inducing DNA fragmentation factor, alpha subunit-like effector B (Cideb), mRNA.	1418976_s_at	12684	0.0006	6.2494	0.0005	1.6423
Ckmt1	NM_009897	Mus musculus creatine kinase, mitochondrial 1, ubiquitous (Ckmt1), mRNA.	1417089_a_at	12716	0	12.7181	0.0004	4.1802
Cldn2	NM_016675	Mus musculus claudin 2 (Cldn2), mRNA.	1417231_at	12738	0.0001	122.382	0.0001	9.5894
Cldn3	NM_009902	Mus musculus claudin 3 (Cldn3), mRNA.	1426332_a_at	12739	0	6.5716	0.0022	2.2905
Cldn4	NM_009903	Mus musculus claudin 4 (Cldn4), mRNA.	1418283_at	12740	0	16.2288	0.0003	5.7202
Clu	NM_013492	Mus musculus clusterin (Clu), mRNA.	1418626_a_at	12759	0	6.7616	0.0002	3.3644
Cox4i2	NM_053091	Mus musculus cytochrome c oxidase subunit IV isoform 2 (Cox4i2), mRNA.	1421373_at	84682	0	-6.46412	0.0002	-1.93536
Crispld2	NM_030209	Mus musculus cysteine-rich secretory protein LCCL domain containing 2 (Crispld2), mRNA.	1460458_at	78892	0	-5.05817	0	-1.96348
Cyp1b1	NM_009994	Mus musculus cytochrome P450, family 1, subfamily b, polypeptide 1 (Cyp1b1), mRNA.	1416612_at	13078	0	9.7138	0.003	2.2959
Dfna5h	NM_018769	Mus musculus deafness, autosomal dominant 5 homolog (human) (Dfna5h), mRNA.	1417903_at	54722	0	6.9512	0.0009	1.3621
Dlk1	NM_010052	Mus musculus delta-like 1 homolog (Drosophila) (Dlk1), mRNA.	1449939_s_at	13386	0	83.8672	0	3.3546
Elf5	NM_010125	Mus musculus E74-like factor 5 (Elf5), mRNA.	1419555_at	13711	0	6.017	0.0016	2.7253
Ereg	NM_007950	Mus musculus epiregulin (Ereg), mRNA.	1419431_at	13874	0.0002	482.203	0.0008	24.7122
Fetub	NM_021564	Mus musculus fetuin beta (Fetub), transcript variant 1, mRNA.	1449555_a_at	59083	0	56.1463	0.0003	15.2881
Fgfr4	NM_008011	Mus musculus fibroblast growth factor receptor 4 (Fgfr4), mRNA.	1418596_at	14186	0	-9.46074	0.0007	-2.29938
Fgg	NM_133862	Mus musculus fibrinogen, gamma polypeptide (Fgg), mRNA.	1416025_at	99571	0.0014	5.9679	0.0002	6.0467
Fgl1	NM_145594	Mus musculus fibrinogen-like protein 1 (Fgl1), mRNA.	1424599_at	234199	0.0007	21.7728	0.0005	2.4835
Foxp2	NM_053242	Mus musculus forkhead box P2 (Foxp2), transcript variant 1, mRNA.	1438231_at	114142	0	7.0964	0	3.1329
Fut2	NM_018876	Mus musculus fucosyltransferase 2 (Fut2), mRNA.	1434862_at	14344	0	9.3571	0	5.1611
G0s2	NM_008059	Mus musculus G0/G1 switch gene 2 (G0s2), mRNA.	1448700_at	14373	0.0007	-7.54717	0	-2.88517
Gch1	NM_008102	Mus musculus GTP cyclohydrolase 1 (Gch1), mRNA.	1420499_at	14528	0	4.2254	0.0033	1.6275
Gjb1	NM_008124	Mus musculus gap junction membrane channel protein beta 1 (Gjb1), mRNA.	1448767_s_at	14618	0	10.1753	0	3.8478
Gjb2	NM_008125	Mus musculus gap junction membrane channel protein beta 2 (Gjb2), mRNA.	1423271_at	14619	0	5.6526	0.0015	2.6693
Gjb3	NM_008126	Mus musculus gap junction membrane channel protein beta 3 (Gjb3), mRNA.	1416715_at	14620	0	24.7726	0.0002	3.0376
Gjb4	NM_008127	Mus musculus gap junction membrane channel protein beta 4 (Gjb4), mRNA.	1422179_at	14621	0	35.3689	0.0017	4.0122
Gkn2	NM_025467	Mus musculus gastrokine 2 (Gkn2), mRNA.	1453132_a_at	66284	0	280.787	0.001	8.2217
Golm1	NM_027307	Mus musculus golgi phosphoprotein 2 (Golph2), transcript variant 1, mRNA.	1415698_at	105348	0	6.7878	0.0002	3.861
Gpm6a	NM_153581	Mus musculus glycoprotein m6a (Gpm6a), mRNA.	1456741_s_at	234267	0.0001	-8.38926	0.0019	-2.88184
Hdc	NM_008230	Mus musculus histidine decarboxylase (Hdc), mRNA.	1454713_s_at	15186	0	5.0709	0	4.5128
Hecw1	NM_001081348	Mus musculus HECT, C2 and WW domain containing E3 ubiquitin protein ligase 1 (Hecw1), mRNA.	1456527_at	94253	0.0001	9.6776	0.0001	3.4502
Hgfac	NM_019447	Mus musculus hepatocyte growth factor activator (Hgfac), mRNA.	1418405_at	54426	0	7.653	0.0006	1.9498
Hpn	NM_008281	Mus musculus hepsin (Hpn), mRNA.	1420712_a_at	15451	0	8.6959	0.0004	2.1571
Igfbp3	NM_008343	Mus musculus insulin-like growth factor binding protein 3 (Igfbp3), mRNA.	1458268_s_at	16009	0	-8.09717	0	-2.78629
Itih2	NM_010582	Mus musculus inter-alpha trypsin inhibitor, heavy chain 2 (Itih2), mRNA.	1417618_at	16425	0	45.7542	0.0001	7.2413
Kcnf1	NM_201531	Mus musculus potassium voltage-gated channel, subfamily F, member 1 (Kcnf1), mRNA.	1454768_at	382571	0	6.8568	0.0007	2.4471
Krt18	NM_010664	Mus musculus keratin 18 (Krt18), mRNA.	1448169_at	16668	0	6.5186	0	2.8853
Lad1	NM_133664	Mus musculus ladinin (Lad1), mRNA.	1418449_at	16763	0	16.0494	0.0002	2.3058
Lrtm2	NM_172492	Mus musculus leucine-rich repeats and transmembrane domains 2 (Lrtm2), mRNA.	1433744_at	211187	0.0018	-8.40336	0.0027	-1.96541
Ltb4dh	NM_025968	Mus musculus leukotriene B4 12-hydroxydehydrogenase (Ltb4dh), mRNA.	1417777_at	67103	0	10.4917	0.0022	4.2154
Mal	NM_010762	Mus musculus myelin and lymphocyte protein, T-cell differentiation protein (Mal), mRNA.	1432558_a_at	17153	0	6.7288	0.0001	3.2776
Mapk13	NM_011950	Mus musculus mitogen activated protein kinase 13 (Mapk13), mRNA.	1448871_at	26415	0	7.0891	0.0006	2.6849
Mboat1	NM_153546	Mus musculus membrane bound O-acyltransferase domain containing 1 (Mboat1), mRNA.	1435323_a_at	218121	0	6.0052	0.0025	2.2559
Mlph	NM_053015	Mus musculus melanophilin (Mlph), mRNA.	1449896_at	171531	0	4.4862	0.0002	2.2208
Mpzl2	NM_007962	Mus musculus epithelial V-like antigen 1 (Eva1), mRNA.	1416236_a_at	14012	0	6.9545	0.0002	3.1218
Nek6	NM_021606	Mus musculus NIMA (never in mitosis gene a)-related expressed kinase 6 (Nek6), mRNA.	1423596_at	59126	0	4.8657	0.0002	1.9087
Pcbd1	NM_025273	Mus musculus pterin 4 alpha carbinolamine dehydratase/dimerization cofactor of hepatocyte nuclear factor 1 alpha (TCF1) 1 (Pcbd1), mRNA.	1418713_at	13180	0	6.9326	0.0012	3.257
Pkhd1	NM_153179	Mus musculus polycystic kidney and hepatic disease 1 (Pkhd1), mRNA.	1419820_at	241035	0.0009	65.2977	0	2.3023
Plek2	NM_013738	Mus musculus pleckstrin 2 (Plek2), mRNA.	1449424_at	27260	0	7.6602	0.0003	2.7694
Prokr1	NM_021381	Mus musculus prokineticin receptor 1 (Prokr1), mRNA.	1456543_at	58182	0	10.8238	0.0021	1.8093
Psat1	NM_177420	Mus musculus phosphoserine aminotransferase 1 (Psat1), mRNA.	1451064_a_at	107272	0	5.3177	0.0022	2.1003
Ptgfr	ENSMUST00000029670	prostaglandin F receptor (Ptgfr), mRNA gene:ENSMUSG00000028036	1446331_at	19220	0.0002	-8.1103	0.004	-2.76472
Ptprn	NM_008985	Mus musculus protein tyrosine phosphatase, receptor type, N (Ptprn), mRNA.	1416588_at	19275	0	10.5853	0	11.3044
Rab3c	NM_023852	Mus musculus RAB3C, member RAS oncogene family (Rab3c), mRNA.	1449494_at	67295	0.0006	7.993	0.0029	3.8525
Rap1gap	NM_001081155	Mus musculus Rap1 GTPase-activating protein (Rap1gap), mRNA.	1428443_a_at	110351	0	7.7803	0.0002	2.9977
Rasgrf1	NM_011245	Mus musculus RAS protein-specific guanine nucleotide-releasing factor 1 (Rasgrf1), transcript variant 1, mRNA.	1422600_at	19417	0	25.7847	0.0001	2.5924
Rbm35a	NM_194055	Mus musculus RNA binding motif protein 35A (Rbm35a), mRNA.	1454681_at	207920	0	3.8435	0	2.5176
Rgs16	NM_011267	Mus musculus regulator of G-protein signaling 16 (Rgs16), mRNA.	1426037_a_at	19734	0.0004	42.7362	0	2.7085
Rhbdl2	NM_183163	Mus musculus rhomboid, veinlet-like 2 (Drosophila) (Rhbdl2), mRNA.	1442819_at	230726	0	65.3011	0.0003	3.9079
Ros1	NM_011282	Mus musculus Ros1 proto-oncogene (Ros1), mRNA.	1425970_a_at	19886	0	7.9152	0	7.4576
S100a14	NM_025393	Mus musculus S100 calcium binding protein A14 (S100a14), mRNA.	1449166_at	66166	0	13.4175	0.0004	7.7622
Sertad4	NM_198247	Mus musculus SERTA domain containing 4 (Sertad4), mRNA.	1454877_at	214791	0	5.064	0	1.8787
Shmt1	NM_009171	Mus musculus serine hydroxymethyltransferase 1 (soluble) (Shmt1), mRNA.	1425178_s_at	20425	0	5.1698	0.0006	2.5464
Slc15a2	NM_021301	Mus musculus solute carrier family 15 (H+/peptide transporter), member 2 (Slc15a2), mRNA.	1424730_a_at	57738	0	7.2453	0.0002	3.6266
Slc23a3	NM_194333	Mus musculus solute carrier family 23 (nucleobase transporters), member 3 (Slc23a3), mRNA.	1460042_at	22626	0	15.8451	0.0006	1.8756
Slc26a4	NM_011867	Mus musculus solute carrier family 26, member 4 (Slc26a4), mRNA.	1419725_at	23985	0.0001	10.7974	0	5.6021
Smurf1	NM_001038627	Mus musculus SMAD specific E3 ubiquitin protein ligase 1 (Smurf1), transcript variant 1, mRNA.	1428396_at	75788	0.0002	14.1641	0.002	1.2609
Spint1	NM_016907	Mus musculus serine protease inhibitor, Kunitz type 1 (Spint1), mRNA.	1416627_at	20732	0	5.3987	0.0033	2.3008
St14	NM_011176	Mus musculus suppression of tumorigenicity 14 (colon carcinoma) (St14), mRNA.	1418076_at	19143	0	4.2805	0.0009	2.3048
St8sia6	NM_145838	Mus musculus ST8 alpha-N-acetyl-neuraminide alpha-2,8-sialyltransferase 6 (St8sia6), mRNA.	1456440_s_at	241230	0	56.4507	0	16.4419
Stk39	NM_016866	Mus musculus serine/threonine kinase 39, STE20/SPS1 homolog (yeast) (Stk39), mRNA.	1419551_s_at	53416	0	22.5657	0.0001	5.0946
Sult2b1	NM_017465	Mus musculus sulfotransferase family, cytosolic, 2B, member 1 (Sult2b1), mRNA.	1417335_at	54200	0.0002	13.577	0.0001	2.1791
Tacstd1	NM_008532	Mus musculus tumor-associated calcium signal transducer 1 (Tacstd1), mRNA.	1416579_a_at	17075	0	4.8069	0.0003	2.43
Tcf21	NM_011545	Mus musculus transcription factor 21 (Tcf21), mRNA.	1417447_at	21412	0.0002	-7.49064	0.0003	-3.11721
Tmem100	ENSMUST00000092788	transmembrane protein 100 (Tmem100), mRNA gene:ENSMUSG00000069763	1449533_at	67888	0.0001	-6.37349	0.0009	-2.20653
Tmem139	NM_175408	Mus musculus transmembrane protein 139 (Tmem139), mRNA.	1436556_at	109218	0	4.1756	0.0005	2.1415
Tmem54	NM_025452	Mus musculus transmembrane protein 54 (Tmem54), mRNA.	1417895_a_at	66260	0	16.5583	0.0005	2.7473
Tnfrsf21	NM_178589	Mus musculus tumor necrosis factor receptor superfamily, member 21 (Tnfrsf21), mRNA.	1450731_s_at	94185	0	6.0676	0.0012	3.08
Treml4	NM_172623	Mus musculus triggering receptor expressed on myeloid cells-like 4 (Treml4), transcript variant 2, mRNA.	1460014_at	224840	0.0005	-7.1582	0.0002	-2.06996
Tspan11	NM_026743	Mus musculus tetraspanin 11 (Tspan11), mRNA.	1441776_at	68498	0	4.6865	0.0019	2.5362
Upk1b	NM_178924	Mus musculus uroplakin 1B (Upk1b), mRNA.	1435831_at	22268	0	-6.69344	0.0004	-2.82087
Vill	NM_011700	Mus musculus villin-like (Vill), mRNA.	1426022_a_at	22351	0	4.9317	0.002	2.2039
Wnk4	NM_175638	Mus musculus WNK lysine deficient protein kinase 4 (Wnk4), mRNA.	1427196_at	69847	0	6.6404	0	1.9872
Wscd1	NM_177618	Mus musculus WSC domain containing 1 (Wscd1), mRNA.	1455845_at	216881	0	-5.19211	0.0024	-1.87301
