# Supplementary material for: A Cross-Platform Comparison of Genome-Wide Expression Changes of Laser Microdissected Lung Tissue of C-Raf Transgenic Mice Using 3′IVT and Exon Array
Source: PLoS One. 2012 Jul 16;7(7):e40778. doi: 10.1371/journal.pone.0040778 (PMC3397940; doi:10.1371/journal.pone.0040778)
Supplement: File S16 — List of common genes found when same platform of ArrayTrack software used for comparison between 3′IVT and exon array for comparing groups tumor vs non-transgenic. For 3′IVT array differential gene expression fold change obtained with parameters as false detection rate (FDR) of <0.001, fold change of ≥2, mean channel intensity (MCI) of 100, bad flag of 5. For exon array differential gene expression fold change obtained at core probeset level with parameters as false detection rate (FDR) of <0.05, mean channel intensity (MCI) of 100, bad flag of 4. (XLS) [file pone.0040778.s021.xls]

## Sheet: Sheet1
Gene symbol	NCBI annotation	gene discription	GEN_ID_MFR 3'IVT	LOCUSID 3'IVT	p value 3'IVT	fold change 3'IVT array	p value exon array for gene expression	fold change exon array_core probeset level by ArrayTrack
1110032E23Rik	NM_133187	Mus musculus RIKEN cDNA 1110032E23 gene (1110032E23Rik), mRNA.	1416805_at	68659	0.0007	-6.02047	0	-5.23286
1200009O22Rik	NM_025817	Mus musculus RIKEN cDNA 1200009O22 gene (1200009O22Rik), mRNA.	1428922_at	66873	0	-8.84173	0	-3.07787
2310016C08Rik	NM_023516	Mus musculus RIKEN cDNA 2310016C08 gene (2310016C08Rik), mRNA.	1421031_a_at	69573	0	-10.8932	0	-5.82751
4732435N03Rik	NM_172753	Mus musculus RIKEN cDNA 4732435N03 gene (4732435N03Rik), mRNA.	1452366_at	234356	0	-6.78426	0	-5.73394
Aard	NM_175503	Mus musculus alanine and arginine rich domain containing protein (Aard), mRNA.	1434528_at	239435	0	-15.6495	0.0002	-2.84495
Abcg3	NM_030239	Mus musculus ATP-binding cassette, sub-family G (WHITE), member 3 (Abcg3), mRNA.	1421168_at	27405	0.0012	-15.949	0	-3.95257
Abi3bp	NM_001014423	Mus musculus ABI gene family, member 3 (NESH) binding protein (Abi3bp), transcript variant 5, mRNA.	1427054_s_at	320712	0.0004	-10.0705	0	-7.93021
Ablim3	NM_198649	Mus musculus actin binding LIM protein family, member 3 (Ablim3), mRNA.	1434013_at	319713	0.0006	-5.75043	0	-4.60405
Acoxl	NM_028765	Mus musculus acyl-Coenzyme A oxidase-like (Acoxl), mRNA.	1460470_at	74121	0.0017	-8.13008	0	-2.99312
Acvrl1	NM_009612	Mus musculus activin A receptor, type II-like 1 (Acvrl1), mRNA.	1435825_at	11482	0	-9.93049	0	-5.41712
Adcy8	NM_009623	Mus musculus adenylate cyclase 8 (Adcy8), mRNA.	1418754_at	11514	0	-26.6667	0	-9.38086
Adora1	NM_001008533	Mus musculus adenosine A1 receptor (Adora1), transcript variant 1, mRNA.	1435495_at	11539	0	7.4041	0.0001	2.799
Adssl1	NM_007421	Mus musculus adenylosuccinate synthetase like 1 (Adssl1), mRNA.	1449383_at	11565	0	8.4864	0	5.6639
Aff2	NM_008032	Mus musculus AF4/FMR2 family, member 2 (Aff2), mRNA.	1443847_x_at	14266	0.0002	-7.99361	0	-3.08928
Aff3	BC052061	Mus musculus AF4/FMR2 family, member 3, mRNA (cDNA clone MGC:62452 IMAGE:5702935), complete cds.	1433939_at	16764	0.0004	-18.4502	0	-5.73066
Agpat4	NM_026644	Mus musculus 1-acylglycerol-3-phosphate O-acyltransferase 4 (lysophosphatidic acid acyltransferase, delta) (Agpat4), mRNA.	1436640_x_at	68262	0	-6.16143	0	-4.07166
Agtr1a	NM_177322	Mus musculus angiotensin II receptor, type 1a (Agtr1a), mRNA.	1436739_at	11607	0.0005	-7.45712	0	-7.87402
Akap12	NM_031185	Mus musculus A kinase (PRKA) anchor protein (gravin) 12 (Akap12), mRNA.	1419706_a_at	83397	0.0008	-13.5685	0.0067	-2.28519
Akap2	NM_001035533	Mus musculus A kinase (PRKA) anchor protein 2 (Akap2), transcript variant 1, mRNA.	1455870_at	11641	0.0004	-6.76133	0	-6.96379
Alas2	NM_009653	Mus musculus aminolevulinic acid synthase 2, erythroid (Alas2), mRNA.	1451675_a_at	11656	0.001	-15.9236	0	-14.0845
Aldh1a1	NM_013467	Mus musculus aldehyde dehydrogenase family 1, subfamily A1 (Aldh1a1), mRNA.	1416468_at	11668	0	-5.0226	0	-5.84112
Amph	NM_175007	Mus musculus amphiphysin (Amph), mRNA.	1427044_a_at	218038	0.0003	-46.729	0	-7.26744
Angpt1	NM_009640	Mus musculus angiopoietin 1 (Angpt1), mRNA.	1439066_at	11600	0	-9.86193	0	-6.77966
Ankrd1	NM_013468	Mus musculus ankyrin repeat domain 1 (cardiac muscle) (Ankrd1), mRNA.	1420992_at	107765	0.0001	-10.5932	0	-5.60852
Ankrd22	NM_024204	Mus musculus ankyrin repeat domain 22 (Ankrd22), mRNA.	1453239_a_at	52024	0	53.5155	0	21.5489
Ankrd37	NM_001039562	Mus musculus ankyrin repeat domain 37 (Ankrd37), mRNA.	1436538_at	654824	0.0001	10.0446	0.0004	2.4002
Ankrd38	NM_172872	Mus musculus ankyrin repeat domain 38 (Ankrd38), mRNA.	1436425_at	242553	0.0001	-11.0375	0	-4.40529
Ankrd47	NM_030697	Mus musculus ankyrin repeat domain 47 (Ankrd47), mRNA.	1456629_at	80880	0	-5.78369	0	-2.81136
Areg	NM_009704	Mus musculus amphiregulin (Areg), mRNA.	1421134_at	11839	0	41.7888	0	12.8185
Arg2	NM_009705	Mus musculus arginase type II (Arg2), mRNA.	1418847_at	11847	0.0001	10.62	0	5.8969
Arhgap20	NM_175535	Mus musculus Rho GTPase activating protein 20 (Arhgap20), mRNA.	1429918_at	244867	0	-8.57633	0	-3.99202
Arhgef10	NM_172751	Mus musculus Rho guanine nucleotide exchange factor (GEF) 10 (Arhgef10), transcript variant 1, mRNA.	1452302_at	234094	0.0004	-6.32511	0	-3.85208
Arhgef15	NM_177566	Mus musculus Rho guanine nucleotide exchange factor (GEF) 15 (Arhgef15), mRNA.	1440358_at	442801	0	-5.62114	0	-3.75799
Armcx1	NM_030066	Mus musculus armadillo repeat containing, X-linked 1 (Armcx1), mRNA.	1425914_a_at	78248	0	-4.89716	0.0009	-3.885
Art3	NM_181728	Mus musculus ADP-ribosyltransferase 3 (Art3), mRNA.	1452474_a_at	109979	0.0007	-12.5945	0.0011	-3.72995
Asah3l	NM_139306	Mus musculus N-acylsphingosine amidohydrolase 3-like (Asah3l), mRNA.	1451355_at	230379	0.0003	-6.2422	0	-8.62813
Atp13a4	NM_172613	Mus musculus ATPase type 13A4 (Atp13a4), mRNA.	1438707_at	224079	0	22.9795	0	18.0693
Atp1a2	NM_178405	Mus musculus ATPase, Na+/K+ transporting, alpha 2 polypeptide (Atp1a2), mRNA.	1452308_a_at	98660	0	-8.84173	0	-7.0028
Atp6v0a4	NM_080467	Mus musculus ATPase, H+ transporting, lysosomal V0 subunit A4 (Atp6v0a4), mRNA.	1422030_at	140494	0.0002	55.1108	0	10.8258
Bche	AK052200	Mus musculus 13 days embryo heart cDNA, RIKEN full-length enriched library, clone:D330006P10 product:butyrylcholinesterase, full insert sequence.	1436098_at	12038	0.0026	-14.6199	0.0001	-6.06061
Blr1	NM_007551	Mus musculus Burkitt lymphoma receptor 1 (Blr1), mRNA.	1422003_at	12145	0.0002	-6.10501	0	-2.99133
C1qtnf2	NM_026979	Mus musculus C1q and tumor necrosis factor related protein 2 (C1qtnf2), mRNA.	1431079_at	69183	0	-8.57633	0	-5.18403
Cacna1d	NM_001083616	Mus musculus calcium channel, voltage-dependent, L type, alpha 1D subunit (Cacna1d), transcript variant 2, mRNA.	1427974_s_at	12289	0	-10.929	0	-5.64016
Calcrl	NM_018782	Mus musculus calcitonin receptor-like (Calcrl), mRNA.	1418489_a_at	54598	0	-14.2045	0	-6.00962
Casc4	NM_177054	Mus musculus cancer susceptibility candidate 4 (Casc4), transcript variant 1, mRNA.	1433779_at	319996	0.0003	-6.3857	0	-3.8835
Cbln1	NM_019626	Mus musculus cerebellin 1 precursor protein (Cbln1), mRNA.	1423286_at	12404	0	170.246	0	23.0684
Ccdc85a	NM_181577	Mus musculus coiled-coil domain containing 85A (Ccdc85a), mRNA.	1427157_at	216613	0	-9.57854	0	-4.86855
Cd14	NM_009841	Mus musculus CD14 antigen (Cd14), mRNA.	1417268_at	12475	0	8.9014	0.0026	3.5711
Cd177	NM_026862	Mus musculus CD177 antigen (Cd177), mRNA.	1424509_at	68891	0.0001	36.0427	0	19.6375
Cd19	NM_009844	Mus musculus CD19 antigen (Cd19), mRNA.	1450570_a_at	12478	0.0017	-8.12348	0.0006	-2.39177
Cd97	NM_011925	Mus musculus CD97 antigen (Cd97), mRNA.	1418394_a_at	26364	0.0001	-6.93963	0	-5.38213
Cdh5	NM_009868	Mus musculus cadherin 5 (Cdh5), mRNA.	1433956_at	12562	0.0002	-9.93049	0	-5.2687
Cdo1	NM_033037	Mus musculus cysteine dioxygenase 1, cytosolic (Cdo1), mRNA.	1448842_at	12583	0.0012	-6.98812	0	-16.1551
Cdr2	NM_007672	Mus musculus cerebellar degeneration-related 2 (Cdr2), mRNA.	1417430_at	12585	0	-6.37349	0	-5.28821
Celsr1	NM_009886	Mus musculus cadherin EGF LAG seven-pass G-type receptor 1 (Celsr1), mRNA.	1418925_at	12614	0	5.333	0.0003	3.4838
Centd3	NM_139206	Mus musculus centaurin, delta 3 (Centd3), mRNA.	1419833_s_at	106952	0	-12.2549	0	-5.24384
Cftr	NM_021050	Mus musculus cystic fibrosis transmembrane conductance regulator homolog (Cftr), mRNA.	1420579_s_at	12638	0.0002	-11.0865	0	-5.78035
Chl1	NM_007697	Mus musculus cell adhesion molecule with homology to L1CAM (Chl1), mRNA.	1435190_at	12661	0.0004	50.7558	0	11.5736
Chrdl1	NM_031258	Mus musculus chordin-like 1 (Chrdl1), mRNA.	1456722_at	83453	0	-14.2045	0	-7.05716
Chst1	NM_023850	Mus musculus carbohydrate (keratan sulfate Gal-6) sulfotransferase 1 (Chst1), mRNA.	1449147_at	76969	0	-15.2207	0.0011	-3.20205
Chst7	NM_021715	Mus musculus carbohydrate (N-acetylglucosamino) sulfotransferase 7 (Chst7), mRNA.	1449402_at	60322	0	-4.25894	0.0002	-2.24618
Ckmt1	NM_009897	Mus musculus creatine kinase, mitochondrial 1, ubiquitous (Ckmt1), mRNA.	1417089_a_at	12716	0	14.2717	0.0005	6.7303
Cldn2	NM_016675	Mus musculus claudin 2 (Cldn2), mRNA.	1417231_at	12738	0	123.473	0	23.5574
Cldn5	NM_013805	Mus musculus claudin 5 (Cldn5), mRNA.	1417839_at	12741	0.001	-11.5607	0	-8.98473
Clec14a	NM_025809	Mus musculus C-type lectin domain family 14, member a (Clec14a), mRNA.	1419467_at	66864	0	-11.3895	0	-11.0865
Clec1a	NM_175526	Mus musculus C-type lectin domain family 1, member a (Clec1a), mRNA.	1460039_at	243653	0.0002	-17.6991	0	-10.8696
Clec3b	NM_011606	Mus musculus C-type lectin domain family 3, member b (Clec3b), mRNA.	1449466_at	21922	0.0001	-21.5983	0.0019	-2.77624
Clu	NM_013492	Mus musculus clusterin (Clu), mRNA.	1418626_a_at	12759	0	7.53	0.0002	4.9982
Col13a1	NM_007731	Mus musculus procollagen, type XIII, alpha 1 (Col13a1), mRNA.	1422866_at	12817	0.0001	-10.8932	0.0002	-1.75469
Cox4i2	NM_053091	Mus musculus cytochrome c oxidase subunit IV isoform 2 (Cox4i2), mRNA.	1421373_at	84682	0	-10.3199	0.0001	-3.99202
Crispld2	NM_030209	Mus musculus cysteine-rich secretory protein LCCL domain containing 2 (Crispld2), mRNA.	1460458_at	78892	0.0004	-6.27353	0	-4.02414
Cspg4	NM_139001	Mus musculus chondroitin sulfate proteoglycan 4 (Cspg4), mRNA.	1423341_at	121021	0	-4.19111	0.0011	-1.63693
Cyp2d22	NM_019823	Mus musculus cytochrome P450, family 2, subfamily d, polypeptide 22 (Cyp2d22), mRNA.	1419040_at	56448	0.0001	-5.96659	0	-4.97265
Cyp2j9	NM_028979	Mus musculus cytochrome P450, family 2, subfamily j, polypeptide 9 (Cyp2j9), mRNA.	1424677_at	74519	0.0008	-6.49351	0	-4.05022
Cyp4b1	NM_007823	Mus musculus cytochrome P450, family 4, subfamily b, polypeptide 1 (Cyp4b1), mRNA.	1416194_at	13120	0.0005	-9.84252	0	-12.5628
Dach1	NM_007826	Mus musculus dachshund 1 (Drosophila) (Dach1), transcript variant 1, mRNA.	1433743_at	13134	0.0001	-9.03342	0	-4.56413
Ddah1	NM_026993	Mus musculus dimethylarginine dimethylaminohydrolase 1 (Ddah1), mRNA.	1454995_at	69219	0	-5.46747	0	-6.29723
Ddc	NM_016672	Mus musculus dopa decarboxylase (Ddc), mRNA.	1426215_at	13195	0.0002	-11.1607	0.0027	-2.13174
Des	NM_010043	Mus musculus desmin (Des), mRNA.	1426731_at	13346	0.0001	-4.63607	0	-4.01768
Diras2	NM_001024474	Mus musculus DIRAS family, GTP-binding RAS-like 2 (Diras2), mRNA.	1455436_at	68203	0.0003	-8.83392	0.0087	-1.99481
Dkk2	NM_020265	Mus musculus dickkopf homolog 2 (Xenopus laevis) (Dkk2), mRNA.	1420512_at	56811	0.0001	29.0669	0	3.3101
Dlk1	NM_010052	Mus musculus delta-like 1 homolog (Drosophila) (Dlk1), mRNA.	1449939_s_at	13386	0.0005	65.8058	0	4.8191
Dmn	NM_201639	Mus musculus desmuslin (Dmn), transcript variant 1, mRNA.	1455610_at	233335	0	-5.54324	0	-2.52334
Dnahc8	NM_013811	Mus musculus dynein, axonemal, heavy chain 8 (Dnahc8), mRNA.	1424936_a_at	13417	0	-12.0048	0.0071	-1.19947
Dpep1	NM_007876	Mus musculus dipeptidase 1 (renal) (Dpep1), mRNA.	1435943_at	13479	0.0004	-23.0947	0	-14.0252
Dpt	NM_019759	Mus musculus dermatopontin (Dpt), mRNA.	1418511_at	56429	0.0001	-5.97015	0	-5.54631
Ecm2	NM_001012324	Mus musculus extracellular matrix protein 2, female organ and adipocyte specific (Ecm2), mRNA.	1440096_at	407800	0.0001	-12.987	0	-5.43774
Edg3	NM_010101	Mus musculus endothelial differentiation, sphingolipid G-protein-coupled receptor, 3 (Edg3), mRNA.	1437173_at	13610	0	-6.27746	0.0001	-6.09385
Edil3	NM_010103	Mus musculus EGF-like repeats and discoidin I-like domains 3 (Edil3), transcript variant 2, mRNA.	1433474_at	13612	0.0018	-22.3714	0	-6.31313
Ednrb	NM_007904	Mus musculus endothelin receptor type B (Ednrb), mRNA.	1437347_at	13618	0.0003	-25.0627	0	-14.3472
Efemp1	NM_146015	Mus musculus epidermal growth factor-containing fibulin-like extracellular matrix protein 1 (Efemp1), mRNA.	1427183_at	216616	0.0004	-8.7108	0	-6.16523
Efnb2	NM_010111	Mus musculus ephrin B2 (Efnb2), mRNA.	1419639_at	13642	0.0002	-5.12033	0	-4.06504
Eng	NM_007932	Mus musculus endoglin (Eng), mRNA.	1417271_a_at	13805	0	-4.9334	0	-4.80077
Epb4.1l3	NM_013813	Mus musculus erythrocyte protein band 4.1-like 3 (Epb4.1l3), mRNA.	1419062_at	13823	0.0013	-9.05797	0	-5.10725
Ereg	NM_007950	Mus musculus epiregulin (Ereg), mRNA.	1419431_at	13874	0.0002	598.105	0	30.4236
Fetub	NM_021564	Mus musculus fetuin beta (Fetub), transcript variant 1, mRNA.	1449555_a_at	59083	0	78.9125	0.0003	31.3894
Fgf7	NM_008008	Mus musculus fibroblast growth factor 7 (Fgf7), mRNA.	1438405_at	14178	0.0002	-6.42261	0.0004	-7.32064
Fgfr4	NM_008011	Mus musculus fibroblast growth factor receptor 4 (Fgfr4), mRNA.	1418596_at	14186	0	-18.6567	0	-5.01002
Fgg	NM_133862	Mus musculus fibrinogen, gamma polypeptide (Fgg), mRNA.	1416025_at	99571	0	13.1669	0.0004	5.8851
Fgl1	NM_145594	Mus musculus fibrinogen-like protein 1 (Fgl1), mRNA.	1424599_at	234199	0.0003	47.9955	0	4.6203
Figf	NM_010216	Mus musculus c-fos induced growth factor (Figf), mRNA.	1438953_at	14205	0	-26.1097	0	-14.8368
Fmo1	NM_010231	Mus musculus flavin containing monooxygenase 1 (Fmo1), mRNA.	1417429_at	14261	0.0002	-24.0964	0	-14.4718
Foxa3	NM_008260	Mus musculus forkhead box A3 (Foxa3), mRNA.	1431900_a_at	15377	0.0001	12.1529	0.0095	1.4406
Foxf1a	NM_010426	Mus musculus forkhead box F1a (Foxf1a), mRNA.	1434939_at	15227	0	-10.8342	0	-7.54148
Foxq1	NM_008239	Mus musculus forkhead box Q1 (Foxq1), mRNA.	1438558_x_at	15220	0.0002	12.7958	0.0004	2.8289
Fut2	NM_018876	Mus musculus fucosyltransferase 2 (Fut2), mRNA.	1434862_at	14344	0	7.6088	0	9.2896
Fxyd1	NM_052992	Mus musculus FXYD domain-containing ion transport regulator 1 (Fxyd1), transcript variant 3, mRNA.	1421374_a_at	56188	0.0001	-7.62195	0.0002	-3.28299
G0s2	NM_008059	Mus musculus G0/G1 switch gene 2 (G0s2), mRNA.	1448700_at	14373	0	-12.7226	0	-6.0241
Galntl4	NM_173739	Mus musculus UDP-N-acetyl-alpha-D-galactosamine:polypeptide N-acetylgalactosaminyltransferase-like 4 (Galntl4), mRNA.	1454780_at	233733	0	-5.26316	0	-3.55492
Gap43	NM_008083	Mus musculus growth associated protein 43 (Gap43), mRNA.	1423537_at	14432	0.0001	-15.0376	0.0001	-2.82008
Gata2	NM_008090	Mus musculus GATA binding protein 2 (Gata2), mRNA.	1450333_a_at	14461	0	-7.4239	0	-6.8306
Gata3	NM_008091	Mus musculus GATA binding protein 3 (Gata3), mRNA.	1448886_at	14462	0.0004	-12.7714	0	-2.99043
Gcnt1	NM_173442	Mus musculus glucosaminyl (N-acetyl) transferase 1, core 2 (Gcnt1), mRNA.	1460431_at	14537	0	7.537	0	2.5061
Gfra2	NM_008115	Mus musculus glial cell line derived neurotrophic factor family receptor alpha 2 (Gfra2), mRNA.	1459847_x_at	14586	0.0002	-9.90099	0	-3.69413
Gimap6	NM_153175	Mus musculus GTPase, IMAP family member 6 (Gimap6), mRNA.	1427891_at	231931	0.0004	-6.77966	0	-5.19481
Gja5	NM_008121	Mus musculus gap junction membrane channel protein alpha 5 (Gja5), mRNA.	1429101_at	14613	0	-8.76424	0	-4.16493
Gjb3	NM_008126	Mus musculus gap junction membrane channel protein beta 3 (Gjb3), mRNA.	1416715_at	14620	0.0004	23.0431	0	3.8236
Gjb4	NM_008127	Mus musculus gap junction membrane channel protein beta 4 (Gjb4), mRNA.	1422179_at	14621	0	35.2805	0	5.9187
Gkn2	NM_025467	Mus musculus gastrokine 2 (Gkn2), mRNA.	1453132_a_at	66284	0	273.681	0	12.9005
Glrx	NM_053108	Mus musculus glutaredoxin (Glrx), mRNA.	1416592_at	93692	0.0001	5.5953	0	4.9136
Gna14	NM_008137	Mus musculus guanine nucleotide binding protein, alpha 14 (Gna14), mRNA.	1420385_at	14675	0	-7.44048	0	-4.79846
Golm1	NM_027307	Mus musculus golgi phosphoprotein 2 (Golph2), transcript variant 1, mRNA.	1415698_at	105348	0	6.9125	0	6.7222
Gpc3	NM_016697	Mus musculus glypican 3 (Gpc3), mRNA.	1450990_at	14734	0	-9.08265	0	-8.77193
Gpc6	NM_001079844	Mus musculus glypican 6 (Gpc6), transcript variant 1, mRNA.	1428774_at	23888	0	12.9897	0.0026	4.6807
Gpm6a	NM_153581	Mus musculus glycoprotein m6a (Gpm6a), mRNA.	1426442_at	234267	0	-14.2045	0	-13.6986
Gpr126	NM_001002268	Mus musculus G protein-coupled receptor 126 (Gpr126), mRNA.	1437409_s_at	215798	0	-8.56898	0	-5.98802
Grap	NM_027817	Mus musculus GRB2-related adaptor protein (Grap), mRNA.	1429387_at	71520	0.0001	-6.77507	0	-4.63177
Gsta4	NM_010357	Mus musculus glutathione S-transferase, alpha 4 (Gsta4), mRNA.	1416368_at	14860	0.0001	6.5556	0.0056	3.8603
Gstm2	NM_008183	Mus musculus glutathione S-transferase, mu 2 (Gstm2), mRNA.	1416411_at	14863	0	-6.84463	0.0014	-3.51989
Gucy1a3	NM_021896	Mus musculus guanylate cyclase 1, soluble, alpha 3 (Gucy1a3), mRNA.	1420534_at	60596	0	-8.77193	0	-4.2517
Gucy1b3	NM_017469	Mus musculus guanylate cyclase 1, soluble, beta 3 (Gucy1b3), mRNA.	1420872_at	54195	0.0002	-6.59631	0	-5.42005
Gzma	NM_010370	Mus musculus granzyme A (Gzma), mRNA.	1417898_a_at	14938	0.0003	-13.1062	0.0006	-5.52486
Gzme	ENSMUST00000089549	granzyme E (Gzme), mRNA gene:ENSMUSG00000022156	1421227_at	14942	0.0003	563.847	0	40.2761
Hey1	NM_010423	Mus musculus hairy/enhancer-of-split related with YRPW motif 1 (Hey1), mRNA.	1415999_at	15213	0	-10.4167	0	-3.5524
Hgfac	NM_019447	Mus musculus hepatocyte growth factor activator (Hgfac), mRNA.	1418405_at	54426	0	8.5856	0	3.7125
Hoxa4	NM_008265	Mus musculus homeo box A4 (Hoxa4), mRNA.	1427354_at	15401	0	-6.3012	0.0026	-1.34372
Hoxa5	NM_010453	Mus musculus homeo box A5 (Hoxa5), mRNA.	1448926_at	15402	0	-7.28863	0.0003	-5.29942
Hoxb5	NM_008268	Mus musculus homeo box B5 (Hoxb5), mRNA.	1418415_at	15413	0	-9.84252	0.0003	-1.86359
Hpcal4	NM_174998	Mus musculus hippocalcin-like 4 (Hpcal4), mRNA.	1433987_at	170638	0.0001	-47.3934	0.0093	-1.84434
Hpgd	NM_008278	Mus musculus hydroxyprostaglandin dehydrogenase 15 (NAD) (Hpgd), mRNA.	1419906_at	15446	0.0001	-20.8333	0	-14.8148
Hspa12b	NM_028306	Mus musculus heat shock protein 12B (Hspa12b), mRNA.	1460371_at	72630	0	-5.31067	0	-3.36022
Icam2	NM_010494	Mus musculus intercellular adhesion molecule 2 (Icam2), mRNA.	1448862_at	15896	0.0003	-10.4822	0	-5.55247
Igfbp2	NM_008342	Mus musculus insulin-like growth factor binding protein 2 (Igfbp2), mRNA.	1454159_a_at	16008	0.0001	-27.4725	0.0003	-9.58773
Il17rd	NM_134437	Mus musculus interleukin 17 receptor D (Il17rd), mRNA.	1429893_at	171463	0	-5.80383	0	-3.98248
Impdh1	NM_011829	Mus musculus inosine 5'-phosphate dehydrogenase 1 (Impdh1), mRNA.	1423239_at	23917	0	-4.67071	0	-4.68165
Itga8	NM_001001309	Mus musculus integrin alpha 8 (Itga8), mRNA.	1454966_at	241226	0.0002	-19.6464	0	-15.015
Itih2	NM_010582	Mus musculus inter-alpha trypsin inhibitor, heavy chain 2 (Itih2), mRNA.	1417618_at	16425	0	36.6753	0.0001	17.0405
Kcnk1	NM_008430	Mus musculus potassium channel, subfamily K, member 1 (Kcnk1), mRNA.	1448690_at	16525	0	6.6872	0.0021	3.3905
Kdr	NM_010612	Mus musculus kinase insert domain protein receptor (Kdr), mRNA.	1449379_at	16542	0	-8.39631	0	-5.84454
Kit	NM_021099	Mus musculus kit oncogene (Kit), mRNA.	1452514_a_at	16590	0	-7.20981	0	-5.38793
Kitl	NM_013598	Mus musculus kit ligand (Kitl), mRNA.	1415855_at	17311	0.0004	-6.97837	0	-8.81057
Klf12	NM_010636	Mus musculus Kruppel-like factor 12 (Klf12), mRNA.	1455521_at	16597	0	-11.6959	0	-4.56204
Klf2	NM_008452	Mus musculus Kruppel-like factor 2 (lung) (Klf2), mRNA.	1448890_at	16598	0	-7.61035	0	-3.79075
Kng1	NM_023125	Mus musculus kininogen 1 (Kng1), mRNA.	1416676_at	16644	0	144.426	0.006	1.7084
Krt18	NM_010664	Mus musculus keratin 18 (Krt18), mRNA.	1448169_at	16668	0	6.7541	0	4.242
Lad1	NM_133664	Mus musculus ladinin (Lad1), mRNA.	1418449_at	16763	0	12.7974	0	3.644
Ldb2	NM_001077398	Mus musculus LIM domain binding 2 (Ldb2), transcript variant 2, mRNA.	1439557_s_at	16826	0.0001	-6.07533	0	-4.52694
Lef1	NM_010703	Mus musculus lymphoid enhancer binding factor 1 (Lef1), mRNA.	1454734_at	16842	0	-4.52284	0	-2.0517
Limch1	NM_001001980	Mus musculus LIM and calponin homology domains 1 (Limch1), mRNA.	1435106_at	77569	0	-5.40833	0.0001	-4.25713
Lims2	NM_144862	Mus musculus LIM and senescent cell antigen like domains 2 (Lims2), mRNA.	1424408_at	225341	0	-8.285	0	-6.58328
Lipg	NM_010720	Mus musculus lipase, endothelial (Lipg), mRNA.	1421262_at	16891	0.0001	-16.9492	0.0001	-7.75795
Lmo2	NM_008505	Mus musculus LIM domain only 2 (Lmo2), mRNA.	1454086_a_at	16909	0	-4.6729	0	-2.66454
Lphn3	NM_198702	Mus musculus latrophilin 3 (Lphn3), mRNA.	1447551_x_at	319387	0.0001	-9.35454	0	-5.58659
Lrat	NM_023624	Mus musculus lecithin-retinol acyltransferase (phosphatidylcholine-retinol-O-acyltransferase) (Lrat), mRNA.	1444487_at	79235	0	-13.1926	0	-11.8483
Lrrn3	NM_010733	Mus musculus leucine rich repeat protein 3, neuronal (Lrrn3), mRNA.	1434539_at	16981	0.0001	-15.1976	0.0002	-5.18135
Lrtm2	NM_172492	Mus musculus leucine-rich repeats and transmembrane domains 2 (Lrtm2), mRNA.	1433744_at	211187	0.006	-13.5501	0.0024	-2.06911
Lyve1	NM_053247	Mus musculus lymphatic vessel endothelial hyaluronan receptor 1 (Lyve1), mRNA.	1453128_at	114332	0	-11.7786	0	-9.76562
Mal	NM_010762	Mus musculus myelin and lymphocyte protein, T-cell differentiation protein (Mal), mRNA.	1417275_at	17153	0.0001	7.3893	0.0002	4.3541
Mamdc2	NM_174857	Mus musculus MAM domain containing 2 (Mamdc2), mRNA.	1453152_at	71738	0.0014	-9.0009	0	-8.93655
Mapk13	NM_011950	Mus musculus mitogen activated protein kinase 13 (Mapk13), mRNA.	1448871_at	26415	0	6.9284	0	3.886
Mapt	NM_001038609	Mus musculus microtubule-associated protein tau (Mapt), transcript variant 1, mRNA.	1424718_at	17762	0	-19.6078	0	-8.23723
Mboat1	NM_153546	Mus musculus membrane bound O-acyltransferase domain containing 1 (Mboat1), mRNA.	1435323_a_at	218121	0	6.0946	0.0003	3.1942
Meis1	NM_010789	Mus musculus myeloid ecotropic viral integration site 1 (Meis1), mRNA.	1450992_a_at	17268	0	-6.18812	0	-7.01262
Mfap4	NM_029568	Mus musculus microfibrillar-associated protein 4 (Mfap4), mRNA.	1424010_at	76293	0.0003	-21.8818	0	-9.38967
Ms4a4b	NM_021718	Mus musculus membrane-spanning 4-domains, subfamily A, member 4B (Ms4a4b), mRNA.	1423467_at	60361	0	-5.47945	0	-4.26803
Mt1	NM_013602	Mus musculus metallothionein 1 (Mt1), mRNA.	1422557_s_at	17748	0	7.1926	0.0001	4.4299
Myh10	NM_175260	Mus musculus myosin, heavy polypeptide 10, non-muscle (Myh10), mRNA.	1452740_at	77579	0.0001	-6.64452	0	-6.02773
Myrip	NM_144557	Mus musculus myosin VIIA and Rab interacting protein (Myrip), mRNA.	1460601_at	245049	0.0002	-8.21018	0	-2.80034
Ncald	NM_134094	Mus musculus neurocalcin delta (Ncald), mRNA.	1417568_at	52589	0	-6.53168	0	-5.22193
Ndn	NM_010882	Mus musculus necdin (Ndn), mRNA.	1415923_at	17984	0	-5.01756	0	-2.11372
Nhlrc2	NM_025811	Mus musculus NHL repeat containing 2 (Nhlrc2), mRNA.	1453048_at	66866	0	-4.29369	0	-1.9992
Nostrin	NM_181547	Mus musculus nitric oxide synthase trafficker (Nostrin), mRNA.	1441075_at	329416	0.0003	-6.57895	0	-6.90608
Notch4	NM_010929	Mus musculus Notch gene homolog 4 (Drosophila) (Notch4), mRNA.	1449146_at	18132	0.0001	-7.65697	0	-3.25521
Npr3	NM_008728	Mus musculus natriuretic peptide receptor 3 (Npr3), transcript variant 1, mRNA.	1435184_at	18162	0	-6.99301	0	-9.60615
Nr2f1	NM_010151	Mus musculus nuclear receptor subfamily 2, group F, member 1 (Nr2f1), mRNA.	1418157_at	13865	0.0012	-7.93651	0.0002	-2.47097
Nsg1	NM_010942	Mus musculus neuron specific gene family member 1 (Nsg1), mRNA.	1423055_at	18196	0	-5.37057	0	-6.64011
Nt5dc2	NM_027289	Mus musculus 5'-nucleotidase domain containing 2 (Nt5dc2), mRNA.	1424882_a_at	70021	0.0001	-6.08643	0	-4.98504
Ogn	NM_008760	Mus musculus osteoglycin (Ogn), mRNA.	1419662_at	18295	0	-52.0833	0	-38.3142
Orm1	NM_008768	Mus musculus orosomucoid 1 (Orm1), mRNA.	1451054_at	18405	0.0001	215.591	0	9.8253
Pcdh1	NM_029357	Mus musculus protocadherin 1 (Pcdh1), mRNA.	1452294_at	75599	0.0006	-5.87199	0	-3.48068
Pcdh12	NM_017378	Mus musculus protocadherin 12 (Pcdh12), mRNA.	1437928_at	53601	0	-6.40205	0.0022	-1.82382
Pcdh18	NM_130448	Mus musculus protocadherin 18 (Pcdh18), mRNA.	1422890_at	73173	0	-8.55432	0.0001	-5.47945
Pcdha6	NM_007767	Mus musculus protocadherin alpha 6 (Pcdha6), mRNA.	1420798_s_at	116731	0	-36.1011	0.0006	-1.21403
Pcolce2	NM_029620	Mus musculus procollagen C-endopeptidase enhancer 2 (Pcolce2), mRNA.	1451527_at	76477	0.0003	-22.8311	0	-15.8983
Pde9a	NM_008804	Mus musculus phosphodiesterase 9A (Pde9a), mRNA.	1449403_at	18585	0	-9.68992	0	-5.35045
Pdgfb	NM_011057	Mus musculus platelet derived growth factor, B polypeptide (Pdgfb), mRNA.	1450414_at	18591	0.0001	-4.61042	0	-2.77239
Pdlim3	NM_016798	Mus musculus PDZ and LIM domain 3 (Pdlim3), mRNA.	1449178_at	53318	0	-6.12745	0.0004	-2.95072
Pgr	NM_008829	Mus musculus progesterone receptor (Pgr), mRNA.	1439527_at	18667	0	-10.5708	0.0001	-2.78319
Phactr1	NM_198419	Mus musculus phosphatase and actin regulator 1 (Phactr1), transcript variant 1, mRNA.	1454832_at	218194	0.0003	-5.19211	0	-3.4188
Phex	NM_011077	Mus musculus phosphate regulating gene with homologies to endopeptidases on the X chromosome (hypophosphatemia, vitamin D resistant rickets) (Phex), mRNA.	1421979_at	18675	0.0009	-8.74891	0.0103	-1.82415
Pitpnc1	NM_145823	Mus musculus phosphatidylinositol transfer protein, cytoplasmic 1 (Pitpnc1), mRNA.	1428878_a_at	71795	0	-6.47668	0	-6.54879
Pkhd1	NM_153179	Mus musculus polycystic kidney and hepatic disease 1 (Pkhd1), mRNA.	1419820_at	241035	0.0004	66.5231	0	4.2177
Plek2	NM_013738	Mus musculus pleckstrin 2 (Plek2), mRNA.	1449424_at	27260	0	7.0164	0.0001	4.2159
Plod2	NM_011961	Mus musculus procollagen lysine, 2-oxoglutarate 5-dioxygenase 2 (Plod2), mRNA.	1416686_at	26432	0	-7.3046	0	-9.02527
Pltp	NM_011125	Mus musculus phospholipid transfer protein (Pltp), mRNA.	1417963_at	18830	0	-8.62069	0	-6.83995
Plxdc1	NM_028199	Mus musculus plexin domain containing 1 (Plxdc1), mRNA.	1424902_at	72324	0	-4.90677	0	-3.01659
Pon1	NM_011134	Mus musculus paraoxonase 1 (Pon1), mRNA.	1418190_at	18979	0	-16.9492	0.0002	-14.0449
Popdc3	NM_024286	Mus musculus popeye domain containing 3 (Popdc3), mRNA.	1423856_at	78977	0.0001	-11.2233	0	-6.62691
Ppbp	NM_023785	Mus musculus pro-platelet basic protein (Ppbp), mRNA.	1418480_at	57349	0.0001	-30.03	0	-8.53971
Ppp1r14a	NM_026731	Mus musculus protein phosphatase 1, regulatory (inhibitor) subunit 14A (Ppp1r14a), mRNA.	1418086_at	68458	0	-12.0337	0.0001	-4.60193
Ppp1r16b	NM_153089	Mus musculus protein phosphatase 1, regulatory (inhibitor) subunit 16B (Ppp1r16b), mRNA.	1455080_at	228852	0	-6.94927	0	-3.54862
Prkce	NM_011104	Mus musculus protein kinase C, epsilon (Prkce), mRNA.	1437861_s_at	18754	0	-5.0813	0	-4.42087
Prkg2	NM_008926	Mus musculus protein kinase, cGMP-dependent, type II (Prkg2), mRNA.	1435460_at	19092	0	-20.0401	0	-12.9199
Prokr1	NM_021381	Mus musculus prokineticin receptor 1 (Prokr1), mRNA.	1456543_at	58182	0	11.3524	0	2.399
Prss22	NM_133731	Mus musculus protease, serine, 22 (Prss22), mRNA.	1420352_at	70835	0	14.085	0.0003	1.8422
Prx	NM_019412	Mus musculus periaxin (Prx), transcript variant 2, mRNA.	1423292_a_at	19153	0.0006	-10.2459	0	-3.0349
Ptgfr	ENSMUST00000029670	prostaglandin F receptor (Ptgfr), mRNA gene:ENSMUSG00000028036	1446331_at	19220	0.0026	-16.3934	0	-7.10732
Pthlh	NM_008970	Mus musculus parathyroid hormone-like peptide (Pthlh), mRNA.	1422324_a_at	19227	0	30.0844	0	3.6329
Ptprb	NM_029928	Mus musculus protein tyrosine phosphatase, receptor type, B (Ptprb), mRNA.	1427486_at	19263	0.0003	-9.29368	0	-8.46024
Ptprd	NM_011211	Mus musculus protein tyrosine phosphatase, receptor type, D (Ptprd), transcript variant b, mRNA.	1429052_at	19266	0.0003	-5.80046	0	-4.83559
Ptprn	NM_008985	Mus musculus protein tyrosine phosphatase, receptor type, N (Ptprn), mRNA.	1416588_at	19275	0	15.7064	0	18.5994
Ramp2	NM_019444	Mus musculus receptor (calcitonin) activity modifying protein 2 (Ramp2), mRNA.	1418187_at	54409	0.0004	-7.45712	0	-8.54701
Rap1gap	NM_001081155	Mus musculus Rap1 GTPase-activating protein (Rap1gap), mRNA.	1428443_a_at	110351	0	9.5634	0.0001	5.7417
Rapgef3	NM_144850	Mus musculus Rap guanine nucleotide exchange factor (GEF) 3 (Rapgef3), mRNA.	1437012_x_at	223864	0	-6.02773	0	-2.80584
Rasgrf1	NM_011245	Mus musculus RAS protein-specific guanine nucleotide-releasing factor 1 (Rasgrf1), transcript variant 1, mRNA.	1422600_at	19417	0	25.4103	0	3.2156
Rasgrp2	NM_011242	Mus musculus RAS, guanyl releasing protein 2 (Rasgrp2), mRNA.	1417804_at	19395	0	-9.9108	0	-3.25521
Rasgrp3	NM_207246	Mus musculus RAS, guanyl releasing protein 3 (Rasgrp3), mRNA.	1438030_at	240168	0.0001	-6.94927	0	-4.93097
Rcan2	NM_207649	Mus musculus regulator of calcineurin 2 (Rcan2), transcript variant 1, mRNA.	1421425_a_at	53901	0.0005	-13.6612	0	-2.2604
Reck	NM_016678	Mus musculus reversion-inducing-cysteine-rich protein with kazal motifs (Reck), mRNA.	1450784_at	53614	0.0005	-6.51466	0	-5.20291
Rgs12	NM_173402	Mus musculus regulator of G-protein signaling 12 (Rgs12), mRNA.	1453129_a_at	71729	0	-6.66223	0	-5.0025
Rgs16	NM_011267	Mus musculus regulator of G-protein signaling 16 (Rgs16), mRNA.	1426037_a_at	19734	0.0005	23.8335	0	3.0721
Rgs18	NM_022881	Mus musculus regulator of G-protein signaling 18 (Rgs18), mRNA.	1420398_at	64214	0	-6.9735	0	-3.61011
Rhbdl2	NM_183163	Mus musculus rhomboid, veinlet-like 2 (Drosophila) (Rhbdl2), mRNA.	1442819_at	230726	0	50.7924	0.0004	5.8
Ripply3	NM_133229	Mus musculus Down syndrome critical region homolog 6 (human) (Dscr6), mRNA.	1420459_at	170765	0.0003	-9.24214	0	-3.99361
Rnd1	NM_172612	Mus musculus Rho family GTPase 1 (Rnd1), mRNA.	1455197_at	223881	0	-6.48088	0.0003	-2.00924
Rnf128	NM_023270	Mus musculus ring finger protein 128 (Rnf128), mRNA.	1418318_at	66889	0	19.7497	0.002	8.9253
Ros1	NM_011282	Mus musculus Ros1 proto-oncogene (Ros1), mRNA.	1425970_a_at	19886	0	11.5626	0	20.1731
Rspo1	NM_138683	Mus musculus R-spondin homolog (Xenopus laevis) (Rspo1), mRNA.	1449319_at	192199	0.0006	-11.1235	0.0017	-1.41363
Rtn1	NM_153457	Mus musculus reticulon 1 (Rtn1), transcript variant 1, mRNA.	1429761_at	104001	0	-7.4239	0.001	-1.71321
Runx1t1	NM_009822	Mus musculus runt-related transcription factor 1; translocated to, 1 (cyclin D-related) (Runx1t1), mRNA.	1448785_at	12395	0	-5.79374	0	-3.0003
S100a14	NM_025393	Mus musculus S100 calcium binding protein A14 (S100a14), mRNA.	1449166_at	66166	0	11.9778	0	9.8293
Satb1	NM_009122	Mus musculus special AT-rich sequence binding protein 1 (Satb1), mRNA.	1416007_at	20230	0	-6.72948	0	-4.03877
Scn3a	NM_018732	Mus musculus sodium channel, voltage-gated, type III, alpha (Scn3a), mRNA.	1439204_at	20269	0.0004	-61.3497	0	-7.25689
Scn7a	NM_009135	Mus musculus sodium channel, voltage-gated, type VII, alpha (Scn7a), mRNA.	1436043_at	20272	0	-10.9051	0	-6.23053
Scrn1	NM_027268	Mus musculus secernin 1 (Scrn1), mRNA.	1439500_at	69938	0	-5.57414	0	-5.60538
Scube2	NM_020052	Mus musculus signal peptide, CUB domain, EGF-like 2 (Scube2), mRNA.	1453486_a_at	56788	0.0005	-34.965	0	-9.14913
Sdpr	NM_138741	Mus musculus serum deprivation response (Sdpr), mRNA.	1416778_at	20324	0	-6.93963	0	-9.06618
Sell	NM_011346	Mus musculus selectin, lymphocyte (Sell), mRNA.	1419481_at	20343	0.0001	-7.45712	0.0001	-4.51467
Sema3e	NM_011348	Mus musculus sema domain, immunoglobulin domain (Ig), short basic domain, secreted, (semaphorin) 3E (Sema3e), mRNA.	1442226_at	20349	0	-6.85401	0	-4.95295
Sema6a	NM_018744	Mus musculus sema domain, transmembrane domain (TM), and cytoplasmic domain, (semaphorin) 6A (Sema6a), mRNA.	1436458_at	20358	0.0001	-8.23723	0	-7.0028
Sema6d	NM_172537	Mus musculus sema domain, transmembrane domain (TM), and cytoplasmic domain, (semaphorin) 6D (Sema6d), transcript variant 1, mRNA.	1453055_at	214968	0.0003	-5.54017	0	-5.37634
Serpina3c	NM_008458	Mus musculus serine (or cysteine) peptidase inhibitor, clade A, member 3C (Serpina3c), mRNA.	1421564_at	16625	0.0078	-15.748	0	-6.17665
Sgip1	NM_144906	Mus musculus SH3-domain GRB2-like (endophilin) interacting protein 1 (Sgip1), mRNA.	1425181_at	73094	0.0001	-12.9534	0	-4.23908
Sh3bp5	NM_011894	Mus musculus SH3-domain binding protein 5 (BTK-associated) (Sh3bp5), mRNA.	1421923_at	24056	0	-5.77367	0.0001	-3.19591
Sh3gl2	NM_019535	Mus musculus SH3-domain GRB2-like 2 (Sh3gl2), mRNA.	1418791_at	20404	0.0013	-12.3916	0	-2.20167
Sh3tc2	NM_172628	Mus musculus SH3 domain and tetratricopeptide repeats 2 (Sh3tc2), mRNA.	1456020_at	225608	0.0003	-20.1207	0	-3.42349
Shank3	NM_021423	Mus musculus SH3/ankyrin domain gene 3 (Shank3), mRNA.	1419137_at	58234	0	-6.4433	0	-3.38066
She	NM_172530	Mus musculus src homology 2 domain-containing transforming protein E (She), mRNA.	1457094_at	214547	0.0003	-5.19481	0	-3.52858
Slc13a4	NM_172892	Mus musculus solute carrier family 13 (sodium/sulfate symporters), member 4 (Slc13a4), mRNA.	1433734_at	243755	0.0017	-24.0964	0	-2.30097
Slc15a2	NM_021301	Mus musculus solute carrier family 15 (H+/peptide transporter), member 2 (Slc15a2), mRNA.	1447808_s_at	57738	0.0001	8.2723	0.0002	5.0562
Slc16a9	NM_025807	Mus musculus solute carrier family 16 (monocarboxylic acid transporters), member 9 (Slc16a9), mRNA.	1429727_at	66859	0.0001	-5.31915	0	-4.80769
Slc22a3	NM_011395	Mus musculus solute carrier family 22 (organic cation transporter), member 3 (Slc22a3), mRNA.	1420444_at	20519	0.0031	-11.3122	0	-2.6295
Slc23a3	NM_194333	Mus musculus solute carrier family 23 (nucleobase transporters), member 3 (Slc23a3), mRNA.	1460042_at	22626	0	15.3364	0	2.5907
Slc24a3	NM_053195	Mus musculus solute carrier family 24 (sodium/potassium/calcium exchanger), member 3 (Slc24a3), mRNA.	1424308_at	94249	0.0005	-5.66893	0	-3.75375
Slc2a3	NM_011401	Mus musculus solute carrier family 2 (facilitated glucose transporter), member 3 (Slc2a3), mRNA.	1437052_s_at	20527	0	-7.33676	0.0002	-3.20924
Slc36a2	NM_153170	Mus musculus solute carrier family 36 (proton/amino acid symporter), member 2 (Slc36a2), mRNA.	1436521_at	246049	0.0001	-6.55308	0	-4.44247
Slc38a5	NM_172479	Mus musculus solute carrier family 38, member 5 (Slc38a5), mRNA.	1454622_at	209837	0.0013	-25.5754	0	-8.11688
Slc43a3	NM_021398	Mus musculus solute carrier family 43, member 3 (Slc43a3), mRNA.	1422788_at	58207	0.0007	-7.52445	0	-6.08643
Slc7a10	NM_017394	Mus musculus solute carrier family 7 (cationic amino acid transporter, y+ system), member 10 (Slc7a10), mRNA.	1421093_at	53896	0	-27.933	0.0003	-5.58347
Smad6	NM_008542	Mus musculus MAD homolog 6 (Drosophila) (Smad6), mRNA.	1422771_at	17130	0	-9.0009	0	-4.1511
Smurf1	NM_001038627	Mus musculus SMAD specific E3 ubiquitin protein ligase 1 (Smurf1), transcript variant 1, mRNA.	1428396_at	75788	0.0001	13.0034	0	1.7371
Snca	NM_001042451	Mus musculus synuclein, alpha (Snca), transcript variant 1, mRNA.	1436853_a_at	20617	0.0001	-19.9203	0	-1.97355
Sox7	NM_011446	Mus musculus SRY-box containing gene 7 (Sox7), mRNA.	1416564_at	20680	0	-5.69801	0	-5.89971
Spock2	NM_052994	Mus musculus sparc/osteonectin, cwcv and kazal-like domains proteoglycan 2 (Spock2), mRNA.	1435026_at	94214	0	-10.4603	0	-6.59631
Sprr1a	NM_009264	Mus musculus small proline-rich protein 1A (Sprr1a), mRNA.	1449133_at	20753	0	8.0171	0.0002	5.078
Srpk3	NM_019684	Mus musculus serine/arginine-rich protein specific kinase 3 (Srpk3), mRNA.	1447806_s_at	56504	0	-6.21118	0.0058	-1.34935
St8sia6	NM_145838	Mus musculus ST8 alpha-N-acetyl-neuraminide alpha-2,8-sialyltransferase 6 (St8sia6), mRNA.	1438566_at	241230	0	34.7768	0	22.2665
Stk39	NM_016866	Mus musculus serine/threonine kinase 39, STE20/SPS1 homolog (yeast) (Stk39), mRNA.	1419551_s_at	53416	0.0011	13.6952	0	7.8813
Stmn2	NM_025285	Mus musculus stathmin-like 2 (Stmn2), mRNA.	1423281_at	20257	0	-8.73362	0.0001	-9.8912
Stxbp6	NM_144552	Mus musculus syntaxin binding protein 6 (amisyn) (Stxbp6), mRNA.	1425749_at	217517	0	-5.90319	0	-8.09061
Tbx3	NM_011535	Mus musculus T-box 3 (Tbx3), transcript variant 1, mRNA.	1448029_at	21386	0	-10.1317	0	-6.0024
Tcf21	NM_011545	Mus musculus transcription factor 21 (Tcf21), mRNA.	1417447_at	21412	0	-20.8333	0	-13.1926
Tek	NM_013690	Mus musculus endothelial-specific receptor tyrosine kinase (Tek), mRNA.	1418788_at	21687	0.0002	-11.325	0	-8.4317
Thbd	NM_009378	Mus musculus thrombomodulin (Thbd), mRNA.	1448529_at	21824	0.0001	-5.98444	0	-7.88644
Tie1	NM_011587	Mus musculus tyrosine kinase receptor 1 (Tie1), mRNA.	1416238_at	21846	0	-7.45156	0	-4.72813
Tm4sf1	NM_008536	Mus musculus transmembrane 4 superfamily member 1 (Tm4sf1), mRNA.	1450958_at	17112	0	-5.02513	0	-4.91884
Tmcc2	NM_178874	Mus musculus transmembrane and coiled-coil domains 2 (Tmcc2), mRNA.	1428108_x_at	68875	0	-18.0832	0.0001	-8.68056
Tmcc3	NM_172051	Mus musculus transmembrane and coiled coil domains 3 (Tmcc3), mRNA.	1434252_at	319880	0.0001	-6.16903	0	-4.24268
Tmeff1	NM_021436	Mus musculus transmembrane protein with EGF-like and two follistatin-like domains 1 (Tmeff1), mRNA.	1426649_at	230157	0.0006	-8.45309	0	-6.90608
Tmeff2	NM_019790	Mus musculus transmembrane protein with EGF-like and two follistatin-like domains 2 (Tmeff2), mRNA.	1419073_at	56363	0	-7.89889	0.0003	-6.03136
Tmem100	ENSMUST00000092788	transmembrane protein 100 (Tmem100), mRNA gene:ENSMUSG00000069763	1446625_at	67888	0.0003	-20.5761	0	-15.456
Tmem46	NM_145463	Mus musculus transmembrane protein 46 (Tmem46), mRNA.	1423852_at	219134	0.002	-15.3139	0.0077	-1.44425
Tmem47	NM_175771	Mus musculus transmembrane protein 47 (Tmem47), mRNA.	1449885_at	192216	0.0004	-5.54324	0	-5.28541
Tmem54	NM_025452	Mus musculus transmembrane protein 54 (Tmem54), mRNA.	1417895_a_at	66260	0	20.3044	0	6.1466
Tmod2	NM_016711	Mus musculus tropomodulin 2 (Tmod2), transcript variant 2, mRNA.	1435060_at	50876	0.0007	-9.23361	0	-7.4239
Tmtc2	NM_177368	Mus musculus transmembrane and tetratricopeptide repeat containing 2 (Tmtc2), mRNA.	1429809_at	278279	0	-8.39631	0	-4.98504
Tnfsf10	NM_009425	Mus musculus tumor necrosis factor (ligand) superfamily, member 10 (Tnfsf10), mRNA.	1459913_at	22035	0	-7.82473	0	-7.09723
Tnfsf9	NM_009404	Mus musculus tumor necrosis factor (ligand) superfamily, member 9 (Tnfsf9), mRNA.	1422924_at	21950	0	20.6592	0	11.4181
Tnnc1	NM_009393	Mus musculus troponin C, cardiac/slow skeletal (Tnnc1), mRNA.	1418370_at	21924	0.0002	-6.30517	0.0011	-1.88041
Tox3	NM_172913	Mus musculus TOX high mobility group box family member 3 (Tox3), mRNA.	1436600_at	244579	0	-6.60939	0.0001	-2.79096
Tppp3	NM_026481	Mus musculus tubulin polymerization-promoting protein family member 3 (Tppp3), mRNA.	1416713_at	67971	0.0002	-8.63558	0	-4.2735
Treml4	NM_172623	Mus musculus triggering receptor expressed on myeloid cells-like 4 (Treml4), transcript variant 2, mRNA.	1460014_at	224840	0.0003	-10.582	0	-3.85208
Tspan11	NM_026743	Mus musculus tetraspanin 11 (Tspan11), mRNA.	1441776_at	68498	0	6.721	0.0005	3.4819
Tspan13	NM_025359	Mus musculus tetraspanin 13 (Tspan13), mRNA.	1418643_at	66109	0.0001	-8.2713	0	-6.32111
Tspan18	NM_183180	Mus musculus tetraspanin 18 (Tspan18), mRNA.	1442174_at	241556	0	-8.68056	0	-12.4688
Tspan7	NM_019634	Mus musculus tetraspanin 7 (Tspan7), mRNA.	1448737_at	21912	0	-11.274	0	-13.6799
Tubb4	NM_009451	Mus musculus tubulin, beta 4 (Tubb4), mRNA.	1423221_at	22153	0	-10.01	0	-3.42231
Unc45b	NM_178680	Mus musculus unc-45 homolog B (C. elegans) (Unc45b), mRNA.	1436939_at	217012	0.0002	-8.35422	0.0039	-1.63372
Upk1b	NM_178924	Mus musculus uroplakin 1B (Upk1b), mRNA.	1455464_x_at	22268	0	-8.34725	0	-8.02568
Ushbp1	NM_181418	Mus musculus Usher syndrome 1C binding protein 1 (Ushbp1), mRNA.	1451500_at	234395	0	-7.98722	0	-2.86205
Vill	NM_011700	Mus musculus villin-like (Vill), mRNA.	1426022_a_at	22351	0	5.6682	0.0007	3.2891
Vsnl1	NM_012038	Mus musculus visinin-like 1 (Vsnl1), mRNA.	1420955_at	26950	0	-24.6914	0	-10.7527
Vtn	NM_011707	Mus musculus vitronectin (Vtn), mRNA.	1420484_a_at	22370	0	-12.4688	0	-6.2422
Wisp2	NM_016873	Mus musculus WNT1 inducible signaling pathway protein 2 (Wisp2), mRNA.	1419015_at	22403	0	-6.34921	0.0001	-2.05002
Wnt2	NM_023653	Mus musculus wingless-related MMTV integration site 2 (Wnt2), mRNA.	1449425_at	22413	0	-16.2338	0	-9.38086
Wscd1	NM_177618	Mus musculus WSC domain containing 1 (Wscd1), mRNA.	1455845_at	216881	0.0013	-11.3636	0	-3.56379
Zeb1	NM_011546	Mus musculus zinc finger E-box binding homeobox 1 (Zeb1), mRNA.	1418926_at	21417	0.0001	-5.7971	0	-4.48229
